# Trade-Offs between the Metabolic Rate and Population Density of Plants

Jian-Ming Deng<sup>1</sup>, Tao Li<sup>1</sup>, Gen-Xuan Wang<sup>2\*</sup>, Jing Liu<sup>3</sup>, Ze-Long Yu<sup>1</sup>, Chang-Ming Zhao<sup>1</sup>, Ming-Fei Ji<sup>1</sup>, Qiang Zhang<sup>1</sup>, Jian-quan Liu<sup>1\*</sup>

**1** MOE Key Laboratory of Arid and Grassland, School of Life Science, Lanzhou University, Lanzhou, China, **2** Institute of Agroecology and Ecoengineering, College of Life Sciences, Zhejiang University, Hangzhou, China, **3** Institute of Modern Physics, Chinese Academy of Sciences, Lanzhou, Gansu

## Abstract

The energetic equivalence rule, which is based on a combination of metabolic theory and the self-thinning rule, is one of the fundamental laws of nature. However, there is a progressively increasing body of evidence that scaling relationships of metabolic rate vs. body mass and population density vs. body mass are variable and deviate from their respective theoretical values of  $3/4$  and  $-3/4$  or  $-2/3$ . These findings questioned the previous hypotheses of energetic equivalence rule in plants. Here we examined the allometric relationships between photosynthetic mass ( $M_p$ ) or leaf mass ( $M_l$ ) vs. body mass ( $\beta$ ); population density vs. body mass ( $\delta$ ); and leaf mass vs. population density, for desert shrubs, trees, and herbaceous plants, respectively. As expected, the allometric relationships for both photosynthetic mass (i.e. metabolic rate) and population density varied with the environmental conditions. However, the ratio between the two exponents was  $-1$  (i.e.  $\beta/\delta = -1$ ) and followed the trade-off principle when local resources were limited. Our results demonstrate for the first time that the energetic equivalence rule of plants is based on trade-offs between the variable metabolic rate and population density rather than their constant allometric exponents.

**Citation:** Deng J-M, Li T, Wang G-X, Liu J, Yu Z-L, et al. (2008) Trade-Offs between the Metabolic Rate and Population Density of Plants. PLoS ONE 3(3): e1799. doi:10.1371/journal.pone.0001799

**Editor:** Jerome Chave, Centre National de la Recherche Scientifique, France

**Received:** January 4, 2008; **Accepted:** January 24, 2008; **Published:** March 19, 2008

**Copyright:** © 2008 Deng et al. This is an open-access article distributed under the terms of the Creative Commons Attribution License, which permits unrestricted use, distribution, and reproduction in any medium, provided the original author and source are credited.

**Funding:** This study was supported by the Natural Science Foundation of China (Grant 30730020 and 30430560) and the hi-tech research and development program (863 Program) of China (Grant 2006AA100202).

**Competing Interests:** The authors have declared that no competing interests exist.

\* E-mail: wanggx@zju.edu.cn (GW); Liujq@nwipb.ac.cn (JL)

## Introduction

Many studies of mammals suggested that the relationship between basal metabolic rate and body mass can be expressed as the  $3/4$  power of the former [1–3]. In addition, when analyzing mammalian data from a wide variety of habitats across the world, Damuth [4–5] showed that population density was inversely scaled with body size and had an allometric exponent of  $-3/4$ . By combining both scaling relationships, they further proposed the energetic equivalence rule, which states that the amount of energy per unit area used by a population of a specific species is independent of body size. Recently, West et al. [6–8] developed a general mechanistic model (the WBE model), based on the fractal volume-filling theory, to predict and explain the  $3/4$  scaling exponent for animals and plants. Enquist et al. [9] extended the energetic equivalence rule from mammal populations to plant populations based on the WBE theory,  $R = N_{\max} Q \propto M^{3/4} M^{-3/4} = M^0$ , where  $R$  is the rate of resource use per unit area;  $N_{\max}$  is the maximum population density;  $Q$  is the average rate of resource use or the metabolic rate per individual; and  $M$  is the average individual mass. These authors then extrapolated their data and concluded that the allometric exponent of the density–mass relationship for plants should be  $-4/3$  rather than  $-3/2$ , and that energy-equivalence as a general model could be applicable to all plant populations in any environment [9–12].

The researchers who developed the WBE theory have claimed that the  $3/4$  exponent contains mathematical errors and is derived

on the basis of an explicit assumption [13–16] and therefore does not generally apply to all organisms. Recent analyses of very large data sets on the basal metabolic rates of mammals and birds support a  $2/3$  exponent, rather than  $3/4$ , derived from Euclidean geometric scaling [13,17]. In addition, the  $-3/2$  power rule for plants (i.e.  $N \propto M^{-2/3}$ ) was ever treated as a general principle of plant population biology [18–19] and the total energy or resource use per unit area for a population can be expressed as:  $R = N_{\max} Q \propto M^{2/3} M^{-2/3} = M^0 = \text{constant}$ . Both of these models show that the rate of resource use per unit area is independent of plant size, although both models assume different allometric exponents. It remains unclear whether the energy equivalence relationship can be derived from  $R \propto M^{3/4} M^{-3/4} = M^0$  or  $R \propto M^{2/3} M^{-2/3} \propto M^0$ .

The process for examining the applicability of the energy equivalence model is difficult and appears logically inappropriate (for discussion see [9]). In our study, we assumed that the relationship between the rate of limiting resource use per unit area and the mean plant size can be described by  $R = KM^\alpha$  (where  $K$  is a constant and  $\alpha$  is an exponent). Since the rate of resource supply per unit area is limiting, the dependent variable  $R$  is a constant  $K'$  so that the exponent ( $\alpha$ ) of the independent variable  $M$  must be zero for any body size, as  $R = KM^0 = K'$ . Therefore, the energy equivalence rule  $R \propto M^0$  should be suitable for any given environment only if the population resource is limited [20]. The process of examining the applicability of the energy equivalence rule is mathematically difficult, and the  $-4/3$  power rule derived

from this energetic equivalence rule has been criticized and questioned by several authors [20–22]. In fact, many authors have suggested that the allometric exponents for the metabolic rate can vary with some biotic and abiotic factors [15,23–26], just as the slopes of self-thinning lines vary between species, shade tolerance and site quality [20,22,27–31]. If the allometric exponent of the average rate of resource use per individual  $Q$  vs. plant mass is  $\beta$ , i.e.  $Q \propto M^\beta$  (where  $\beta$  is variable), according to the general model of energy equivalence,  $R = N_{\max} Q \propto M^0$ , the relationship between population density and plant mass should theoretically follow the model:  $N_{\max} \propto M^\delta$ , where  $\delta = -\beta$  or  $\delta/\beta = -1$ . Currently, it is unclear if this trade-off relationship between the two scaling exponents is valid in natural systems. It is, therefore, necessary to investigate any synchrony in the scaling relationships between metabolic rate and population density, and plant body mass, under different environmental conditions and for different plant types. We will also examine the variability in the allometric exponents  $\beta$  and  $\delta$  that are  $3/4$  and  $-3/4$ , or  $2/3$  and  $-2/3$ , respectively.

The accurate and consistent measurement of metabolic rates is very difficult [3]. According to the predictions of the WBE model, the metabolic rate of plants,  $B$ ; rate of biomass production,  $G$ ; photosynthetic biomass,  $M_p$  (i.e. the total leaf biomass,  $M_L$ ); covary and all should be proportional to the  $3/4$  power of total plant mass,  $M$ , i.e.  $B \propto G \approx M_p$  (or  $M_L$ )  $\propto M^{3/4}$  [3,6–8]. These scaling relationships have been demonstrated by a large number of authors, especially for angiosperms and gymnosperms [32–36]. The rate of biomass production, however, may not adequately reflect the metabolic rate or the rate of resource use because growth rates only provide estimates of an organism's net assimilation, and exclude any dissimilation energy. For the energetic equivalence rule, the average resource use rate or metabolic rate of individual plants,  $Q$ , should be more appropriately replaced by photosynthetic biomass,  $M_L$ . Assuming that the rate of resource use per unit leaf biomass,  $K_i$ , is constant in the same plant type (where  $i$  represents the different plant types or environmental conditions), we can generate the equation:  $Q = M_L \times K_i \propto M_L$ . Combining the models:  $Q \propto M^\beta$ ,  $N \propto M^\delta$ , and  $Q \propto M_L$ , the relationship between leaf mass and density can be obtained by the equation,  $M_L \propto N^{\beta/\delta}$ . If the trade-off relationship between the two scaling exponents holds true, i.e.  $\delta/\beta = -1$ , the predicted leaf mass–density relationship should be consistent with previous studies [12] that have shown a scaling exponent of  $-1$ .

In this study we examined the relationships between metabolic rate and population density, and body size, for a range of plant populations including desert shrubs, different forest types, and monoculture herbage. Our analysis of these data, which spans a size range of 11 orders of magnitude, unequivocally shows that allometric relationships between photosynthetic mass ( $M_p$ ) or leaf mass ( $M_L$ ), and population density and body mass varied greatly between desert shrubs, trees, and herbaceous plants, respectively. We further confirmed that the energetic equivalence rule of plants is based on trade-offs between the variable metabolic rate and population density.

## Results

The scaling exponents ( $\beta$ ) of photosynthetic mass and body mass were statistically analyzed and ranged between 0.47 and 1.06 for the trees, shrubs and herbaceous plants (Table 1). Among the 17 forest types, the 95% confidence intervals (CIs) showed that only one scaling exponent included  $3/4$ , three values contained both  $2/3$  and  $3/4$ , three values included  $2/3$ , and the ten remaining values fell outside the  $2/3$  and  $3/4$  range. For desert shrubs and

spring wheat, the CIs were above  $3/4$  and below  $2/3$ , respectively (Fig. 1A, Fig. 2A, Table 1).

The regression slopes of population density vs. body mass among the forest types had high variability and ranged from  $-0.52$  to  $-1.15$ . Among the 17 forest types, two slope values had 95% CIs that contained  $2/3$ , three contained  $3/4$ , six had both  $2/3$  and  $3/4$  within them, and six fell outside the  $2/3$  and  $3/4$  range (Table 2). The CI for the desert shrubs was greater than the theoretical value of  $3/4$  (Fig. 1B). The regression slope for spring wheat in 2002 was very close to  $-3/4$  (Fig. 2B). These slopes were close to  $-2/3$  in 2003 and 2004, although they were significantly different from  $3/4$  (Table 2).

The ratio value,  $\delta/\beta$ , was calculated for the scaling exponents,  $\delta$  and  $\beta$ . The average value of the  $\delta/\beta$  ratio was  $-0.99$  (Table 2). Furthermore, the regression slope between the two scaling exponents was not statistically different from the predicted value of  $-1$  (Fig. 3).

## Discussion

Our results showed that the scaling exponents of both photosynthetic mass vs. body mass and population density vs. body mass varied depending on plant species and habitat type (Table 1, 2). More importantly, the trade-off relationship between the two scaling exponents supported our prediction, i.e.  $\delta/\beta = -1$  (Table 2). The regression slope values between the two scaling exponents, and density vs. average leaf mass were also close to the theoretical value of  $-1$  (Fig. 3, Fig. 4) and with the previous study by Niklas et al. [12].

There are two main power rules concerning the density/abundance–body size relationship, which are supported by empirical data, i.e. the  $-3/2$  power rule [19,37–40] and the  $-4/3$  power rule [3,9,11,35–36,41]. However, other researchers consider that the allometric exponents vary with environmental factors or between species [20,22,27–28,42–44]. White [18] suggested that the slopes (i.e.  $1/\delta$ ) of biomass–density relationships varied within the range of  $-1.8$  to  $-1.3$ , while Wang and Zhang [45] suggested that the theoretical values of slopes should continuously vary from  $-1$  to  $-\infty$  when the growth forms of plants are transformed from a purely horizontal extension to absolute height growth. In fact, according to the predictions of the WBE model,  $B \propto Q \propto a \propto M^{3/4 + \epsilon_a + \epsilon_l}$  (where  $0 \leq \epsilon_a$  or  $\epsilon_l \leq 1$ , both of which are arbitrary exponents and  $a$  is the total plant leaf area; see [7]), the theoretical values of exponents should range between  $1/2$  and  $3/4$  when plants evolve by natural selection under different conditions of environmental stress [46]. Our results showed that allometric exponents of metabolic rate vary greatly according to a number of biotic and abiotic factors; this supports previous metabolic rate studies [13–14,23–26,47–50]. Although there is considerable evidence that the allometric exponents,  $\beta$  and  $\delta$ , are variable, we found that these different values follow the trade-off law based on the energetic equivalence rule. Furthermore, this trade-off relationship implies that not only are the two types of exponents variable, but they are also co-dependent.

The trade-off relationship is a fundamental principle of strategy theory in evolutionary ecology [51], which considers that an organism adopts a suitable strategy to survive and grow under a given environment stress. The mechanism of both density–leaf mass and the allometric exponents  $\delta$ , or  $1/\delta$ – $\beta$  trade-off relationships may derive from intraspecific plant dynamics. Some researchers have suggested that the leaf biomass per individual inversely scales with population density in populations that are undergoing self-thinning [12,43,52]. The decline in leaf mass per individual with increasing density results in a decrease in the rate of resource use and the allometric exponent  $\beta$  (Fig. 5). Some studies have shown that the exponent,  $1/\delta$ , depends on the

**Table 1.** The scaling relationship between photosynthetic biomass,  $M_p$ , and the body mass,  $M$ , for trees, desert shrubs and herbaceous plants.

| Plant type                                                                              | $n$ | Slope, $\beta \pm SE$ | IT     | 95% CI     | $r^2$ |
|-----------------------------------------------------------------------------------------|-----|-----------------------|--------|------------|-------|
| <b>Trees/Forest</b>                                                                     |     |                       |        |            |       |
| Boreal/temperate <i>Larix</i> forest                                                    | 48  | $0.97 \pm 0.017$      | -1.35  | 0.93, 1.00 | 0.986 |
| Boreal/alpine <i>Picea abies</i> forest                                                 | 168 | $0.61 \pm 0.023$      | 0.81   | 0.53, 0.67 | 0.761 |
| Boreal <i>Pinus sylvestris</i> var. <i>mongolica</i> forest                             | 10  | $0.65 \pm 0.040$      | 0.44   | 0.56, 0.69 | 0.970 |
| Temperate <i>Pinus tabulaeformis</i> forest                                             | 154 | $0.87 \pm 0.023$      | -0.45  | 0.82, 0.93 | 0.897 |
| Temperate mixed coniferous-broadleaved forest                                           | 22  | $0.57 \pm 0.037$      | 0.88   | 0.51, 0.59 | 0.915 |
| Temperate typical deciduous broadleaved forest                                          | 165 | $1.06 \pm 0.041$      | -1.51  | 0.94, 1.20 | 0.758 |
| Temperate/subtropical montane <i>Populus-Betula</i> deciduous forest                    | 127 | $0.99 \pm 0.026$      | -1.39  | 0.93, 1.05 | 0.911 |
| Desert riverside woodland                                                               | 9   | $0.82 \pm 0.14$       | -0.84  | 0.66, 0.90 | 0.791 |
| Subtropical mixed evergreen-deciduous broadleaved forest                                | 22  | $0.89 \pm 0.079$      | -0.81  | 0.79, 1.22 | 0.841 |
| Subtropical evergreen broadleaved forest                                                | 238 | $0.94 \pm 0.015$      | -1.08  | 0.92, 0.96 | 0.940 |
| Sclerophyllous evergreen <i>Quercus</i> forest                                          | 9   | $0.87 \pm 0.049$      | -0.76  | 0.81, 0.93 | 0.977 |
| Tropical rainforest and monsoon forest                                                  | 13  | $0.96 \pm 0.13$       | -1.14  | 0.35, 1.12 | 0.793 |
| Subtropical montane <i>Pinus yunnanensis</i> and <i>P. khasya</i> forest                | 46  | $0.93 \pm 0.02$       | -0.88  | 0.89, 0.96 | 0.980 |
| Subtropical <i>Pinus massoniana</i> forest                                              | 66  | $0.92 \pm 0.052$      | -0.84  | 0.83, 1.02 | 0.798 |
| Subtropical montane <i>Pinus armandii</i> , <i>P. taiwanensis</i> and <i>P. densata</i> | 55  | $0.77 \pm 0.034$      | -0.013 | 0.71, 0.85 | 0.899 |
| Subtropical <i>Cunninghamia lanceolata</i> forest                                       | 98  | $0.81 \pm 0.065$      | -0.21  | 0.65, 0.97 | 0.382 |
| Subtropical montane <i>Cupressus</i> and <i>Sabina</i> forest                           | 16  | $0.55 \pm 0.084$      | 1.14   | 0.43, 0.67 | 0.677 |
| <b>Shrubs</b>                                                                           |     |                       |        |            |       |
| Desert shrubs                                                                           | 148 | $0.92 \pm 0.047$      | -0.71  | 0.84, 1.00 | 0.618 |
| <b>Herbages</b>                                                                         |     |                       |        |            |       |
| Spring wheat 2002                                                                       | 15  | $0.61 \pm 0.075$      | -0.70  | 0.48, 0.70 | 0.803 |
| Spring wheat 2003                                                                       | 10  | $0.47 \pm 0.096$      | -1.02  | 0.36, 0.69 | 0.662 |
| Spring wheat 2004                                                                       | 23  | $0.65 \pm 0.097$      | -0.75  | 0.50, 0.72 | 0.528 |

SE is the standard error, and CI is the confidence interval of the slope.  
doi:10.1371/journal.pone.0001799.t001

allometric exponent between height and stem diameter [45–46]. The latter exponent increases with density because more energy and resources may be allocated to stem height growth as a result of

competition [53–54]. Thus the dynamics of populations with different plant densities and height–stem diameter relationships largely determine the trade-off relationship between the expo-

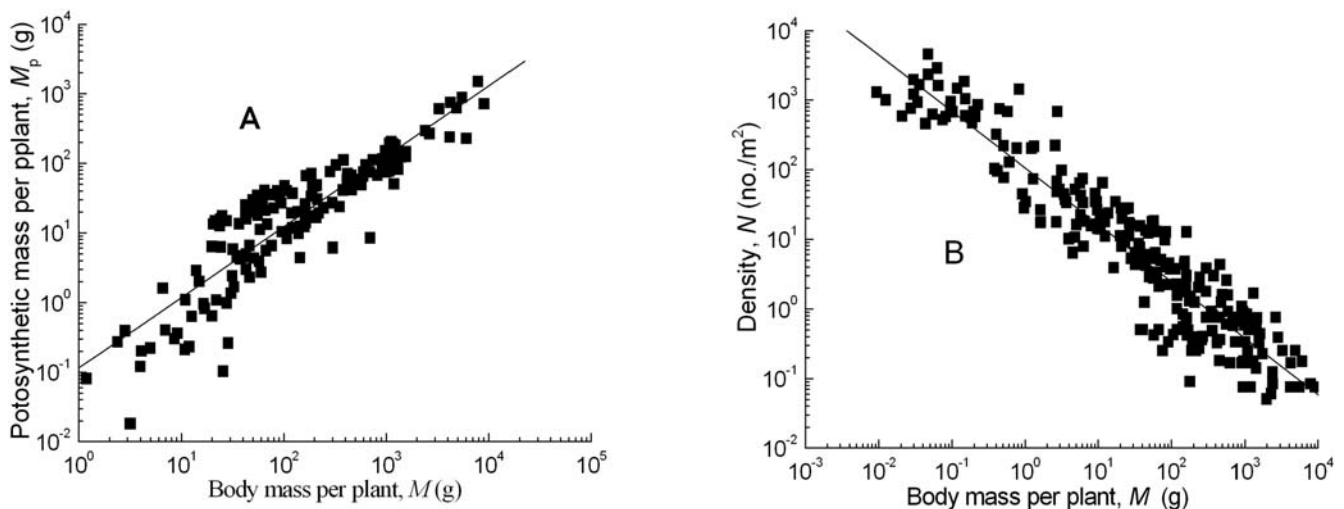

**Figure 1.** The allometric relationships between photosynthetic mass and body mass (A), and population density and body mass (B) for desert shrubs. All regressions are significant at  $P < 0.0001$  and the 95% CI of the slopes are statistically different from  $3/4$  and  $-3/4$  (also see Table 1, 2), but the ratio of the two exponents is not statistically different from  $-1$ .  
doi:10.1371/journal.pone.0001799.g001

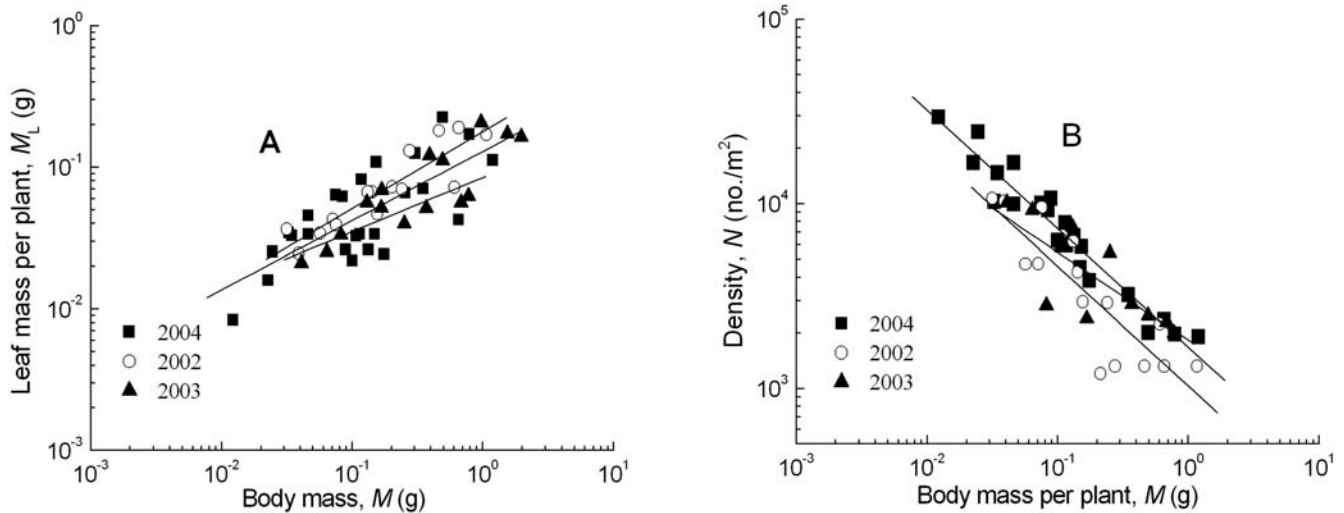

**Figure 2. The allometric relationships between photosynthetic mass and body mass (A), and population density and body mass (B) for dense spring wheat populations.** All regressions are significant at  $P < 0.0001$  and the 95% CI of the slopes are statistically different from  $3/4$  and  $-3/4$  (also see Table 1, 2), but the ratio of the two exponents is not statistically different from  $-1$ .  
doi:10.1371/journal.pone.0001799.g002

**Table 2.** The scaling relationship between population density,  $N$ , and body mass,  $M$ , and the ratio of the allometric exponent  $\delta$  to  $\beta$  for trees, desert shrubs and herbaceous plants.

| Plant type                                                                              | $n$ | Slope, $\delta \pm SE$ | IT   | 95% CI         | $r^2$                              | $\delta/\beta$ |
|-----------------------------------------------------------------------------------------|-----|------------------------|------|----------------|------------------------------------|----------------|
| <b>Trees/Forest</b>                                                                     |     |                        |      |                |                                    |                |
| Boreal/temperate <i>Larix</i> forest                                                    | 48  | $-0.81 \pm 0.040$      | 3.20 | $-0.88, -0.74$ | 0.887                              | $-0.84$        |
| Boreal/alpine <i>Picea abies</i> forest                                                 | 168 | $-0.671 \pm 0.023$     | 2.50 | $-0.72, -0.61$ | 0.802                              | $-1.10$        |
| Boreal <i>Pinus sylvestris</i> var. <i>mongolica</i> forest                             | 10  | $-0.70 \pm 0.055$      | 2.51 | $-0.76, -0.51$ | 0.952                              | $-1.08$        |
| Temperate <i>Pinus tabulaeformis</i> forest                                             | 154 | $-0.81 \pm 0.037$      | 2.88 | $-0.90, -0.71$ | 0.691                              | $-0.93$        |
| Temperate mixed coniferous-broadleaved forest                                           | 22  | $-0.64 \pm 0.027$      | 2.30 | $-0.67, -0.60$ | 0.964                              | $-1.13$        |
| Temperate typical deciduous broadleaved forest                                          | 165 | $-0.88 \pm 0.033$      | 3.34 | $-0.97, -0.81$ | 0.773                              | $-0.83$        |
| Temperate/subtropical montane <i>Populus-Betula</i> deciduous forest                    | 127 | $-0.89 \pm 0.042$      | 3.50 | $-0.97, -1.82$ | 0.729                              | $-0.90$        |
| Desert riverside woodland                                                               | 9   | $-1.13 \pm 0.15$       | 4.42 | $-1.44, -1.02$ | 0.877                              | $-1.37$        |
| Subtropical mixed evergreen-deciduous broadleaved forest                                | 22  | $-0.66 \pm 0.08$       | 2.48 | $-0.90, -0.47$ | 0.700                              | $-0.74$        |
| Subtropical evergreen broadleaved forest                                                | 238 | $-0.72 \pm 0.022$      | 2.85 | $-0.78, -0.68$ | 0.781                              | $-0.77$        |
| Sclerophyllous evergreen <i>Quercus</i> forest                                          | 9   | $-1.15 \pm 0.15$       | 5.21 | $-1.21, -0.89$ | 0.879                              | $-1.32$        |
| Tropical rainforest and monsoon forest                                                  | 13  | $-0.76 \pm 0.12$       | 3.09 | $-1.16, -0.64$ | 0.737                              | $-0.79$        |
| Subtropical montane <i>Pinus yunnanensis</i> and <i>P. khasya</i> forest                | 46  | $-0.85 \pm 0.033$      | 3.31 | $-0.91, -0.77$ | 0.933                              | $-0.90$        |
| Subtropical <i>Pinus massoniana</i> forest                                              | 66  | $-0.73 \pm 0.051$      | 2.74 | $-0.84, -0.63$ | 0.685                              | $-0.79$        |
| Subtropical montane <i>Pinus armandii</i> , <i>P. taiwanensis</i> and <i>P. densata</i> | 55  | $-0.71 \pm 0.038$      | 2.59 | $-0.79, -0.66$ | 0.844                              | $-0.92$        |
| Subtropical <i>Cunninghamia lanceolata</i> forest                                       | 98  | $-0.52 \pm 0.047$      | 1.78 | $-0.64, -0.44$ | 0.211                              | $-0.64$        |
| Subtropical montane <i>Cupressus</i> and <i>Sabina</i> forest                           | 16  | $-0.66 \pm 0.091$      | 2.40 | $-0.84, -0.55$ | 0.731                              | $-1.19$        |
| <b>Shrubs</b>                                                                           |     |                        |      |                |                                    |                |
| Desert shrubs                                                                           | 239 | $-0.87 \pm 0.019$      | 2.10 | $-0.90, -0.83$ | 0.882                              | $-0.94$        |
| <b>Herbages</b>                                                                         |     |                        |      |                |                                    |                |
| Spring wheat 2002                                                                       | 15  | $-0.75 \pm 0.10$       | 2.94 | $-1.08, -0.61$ | 0.752                              | $-1.23$        |
| Spring wheat 2003                                                                       | 10  | $-0.61 \pm 0.14$       | 3.17 | $-0.73, -0.55$ | 0.598                              | $-1.31$        |
| Spring wheat 2004                                                                       | 23  | $-0.66 \pm 0.037$      | 3.20 | $-0.73, -0.62$ | 0.936                              | $-1.03$        |
| <b>Mean value of <math>\beta/\delta \pm SE</math></b>                                   |     |                        |      |                | <b><math>-0.99 \pm 0.21</math></b> |                |

SE is the standard error, and CI is the confidence interval of the slope.  
doi:10.1371/journal.pone.0001799.t002

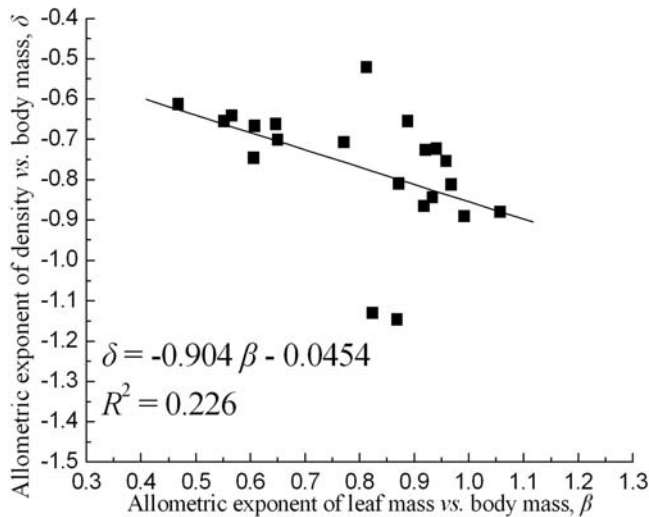

**Figure 3. The regression relationships between the two allometric exponents for trees, desert shrubs and monoculture herbaceous plants (spring wheat).** The slope is very close to  $-1$ . doi:10.1371/journal.pone.0001799.g003

nents,  $\beta$  and  $1/\delta$ , especially in dense populations. Moreover, this trade-off relationship indicates that the values of the scaling exponents,  $\beta$  and  $1/\delta$ , should be continuous variables, rather than constants (Fig. 5B). It remains unclear how the scaling exponent between height and stem diameter quantitatively varies with population density or the intensity of competition.

As reported for metabolic rates [55], we found that the leaf mass reflects both photosynthetic ability and the absorptency of water and nutrients from soil. Under drought conditions, the plant individual has the relatively high ratio of photosynthetic mass to body mass may result from the thick leaves and the assimilating shoots of plants and the relatively small body size, which may lead to increases in the photosynthetic efficiency and the capacity to

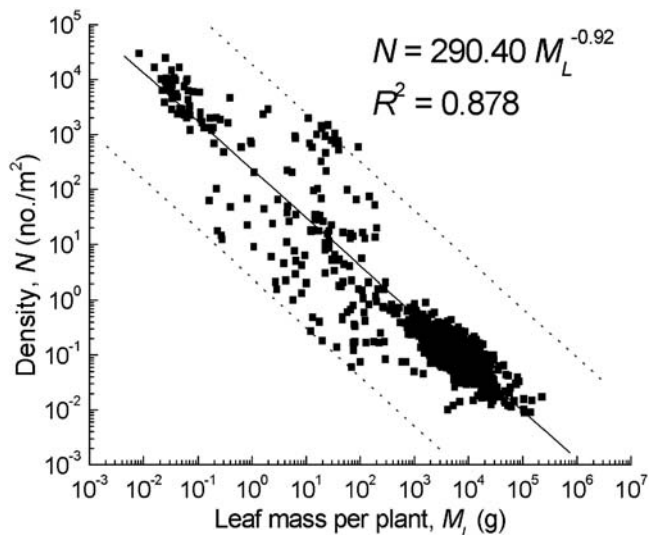

**Figure 4. The allometric relationships between population density and photosynthetic mass or leaf mass for trees, desert shrubs and monoculture herbaceous plants (spring wheat).** The regression is significant at  $P < 0.0001$  and the exponent approximates to the theoretical value of  $-1$  (also see Table 1, 2). doi:10.1371/journal.pone.0001799.g004

absorb water, and also decrease soil evaporation through canopy shading, thereby enhancing the drought stress resistance [56–57]. Moreover, leaves with high ratios of leaf mass/body mass may have further ecological significance in harsh environments; for example, most leaves will fall and decompose to increase soil fertility in nutrient-poor soil [58]. In contrast, high ratios imply that the body size of an individual will be constrained within a relatively small range to reduce the use of the limiting resource and enhance survival ability. The self-thinning phenomenon in plants occurs in dense populations mainly ascribing to the leaf mass per individual (or the value of exponent  $\beta$ ), which drops sharply with increased density and growth. It is noticeable that the fluctuating scaling relationships of leaf mass and body mass for trees are also dependent on environmental conditions and are species-specific. If only resources are limited, both the leaf mass vs. density relationship and the relationship between the scaling exponents,  $\beta$  and  $1/\delta$ , would follow the trade-off law for any given environmental condition. Overall, our results demonstrate for the first time that the energetic equivalence rule of plants is based on trade-offs between the variable metabolic rate and population density rather than their constant allometric exponents.

## Materials and Methods

### Desert shrubs

All of the data used in our analyses were collected in July and August between 2003 and 2007 from shrub-dominated communities at our experimental sites (See the Dataset S2.). The experimental plots are located in the central and western parts of the Gansu province, China (Baiyin, Jingtai, Minqin and Linze sites) between  $100^{\circ}08'$  and  $104^{\circ}24'$  E longitude and between  $39^{\circ}22'$  and  $36^{\circ}29'$  N latitude. They are classified as arid and semi-arid regions on the boundaries of the Tengger and Badain Jaran deserts, where the annual mean precipitation ranges between 115 mm and 209 mm. The design of the sampling quadrats and the measurement of the stand density and total biomass for each population are described by Deng et al. [20]. Because the assimilating branches, twigs and petioles (green tissue) of most xerophyte plants have considerable photosynthetic capacity (in addition to the leaves), enabling them to adapt to arid environments, the mass of all the photosynthetic tissues was measured separately for sub-samples of aboveground and belowground parts of each plant species.

### Trees

All of the data used in this study were collected from the primary literature ([59], included in the Dataset S1., also see <http://www.geodata.cn>). These data spanned a range of latitudes ( $18^{\circ}\text{N}$  and  $53^{\circ}\text{N}$ ), and altitudes (10 m to 4240 m above sea level), including 1266 plots/populations from six biomes and 17 forest types across China [59]. The species under investigation included angiosperms and gymnosperms.

Luo [59] provided information on the average mass and annual net production for different plant parts (leaf, stem, and root) for different aged plants, densities and species. The units of mass and density were converted from tons of dry matter and the number of plants per ha. to grams per individual plant and number of plants per square meter, respectively.

### Herbage

Field experiments with spring wheat (*Triticum aestivum* L. New Cultivar No.3) were conducted at the Yuzhong experimental station of Lanzhou University, China, from May to July in 2002

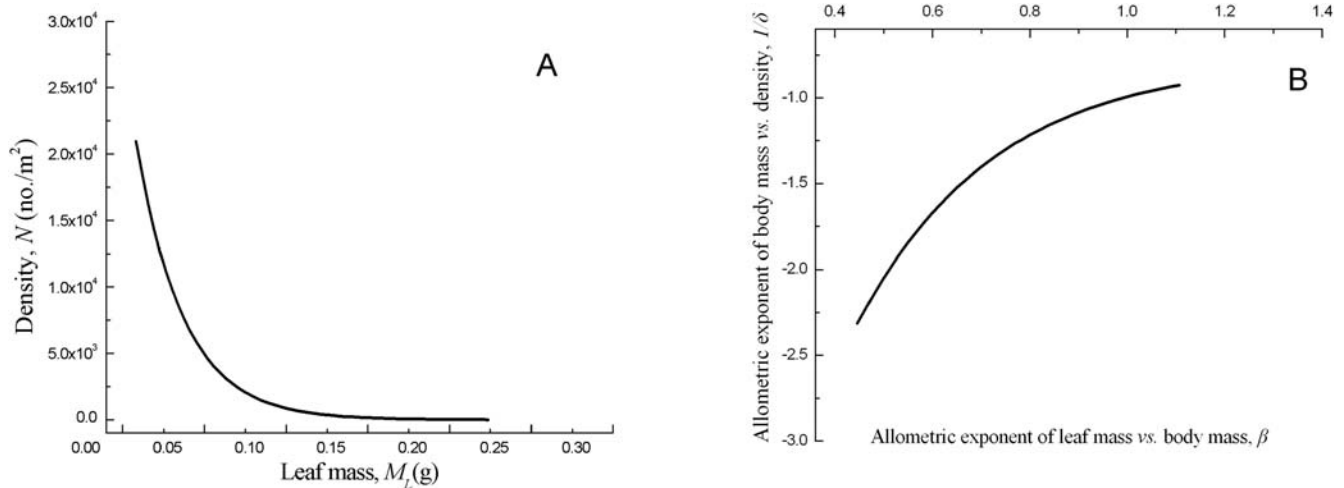

**Figure 5. The trade-off relationships between population density vs. the photosynthetic mass/leaf mass (A) and the allometric exponents,  $1/\delta$  vs.  $\beta$  (B).** The population density and the photosynthetic mass show a reciprocal relationship (A) and the exponents  $1/\delta$  and  $\beta$  show a negative reciprocal relationship (B). doi:10.1371/journal.pone.0001799.g005

and 2004. We also re-analyzed some relevant data from self-thinning experiments of spring wheat populations conducted in 2003 (See the Dataset S3.) [31].

The experimental design combined populations sown at six and ten densities: 1, 10, 100,  $1 \times 10^3$ ,  $4 \times 10^3$ , and  $1 \times 10^4$  seeds  $m^{-2}$ , and 1, 100, 500,  $1 \times 10^3$ ,  $2 \times 10^3$ ,  $6 \times 10^3$ ,  $1 \times 10^4$ ,  $2 \times 10^4$ , and  $4 \times 10^4$  seeds  $m^{-2}$  in 2002 and 2004, respectively, with four replicates for each seed density. The area of each plot was 1 m $\times$ 1 m, with a 0.3 m-wide buffer zone to avoid any marginal effects. The soil moisture and fertility was sufficient to ensure plant growth without any water or nutrient stress [31]. The stand density, leaf area, leaf biomass and body mass were measured in each plot at the three-leaf, tillering, elongation, heading and ripening stages, respectively. The leaf area was estimated by the Dry Weight Method described by Deng et al. [60]. The mean dry mass data were collected from 50 randomly sampled individuals in the populations with sowing densities  $>500/m^2$  in four replicate plots at each sowing density. The dry plant mass was weighed after harvesting and being dried by ovens.

### Statistical Analyses

To meet the requirement of the energetic equivalence rule for spring wheat populations, we analyzed the relevant data for closed populations with sowing densities  $>1000$  seeds  $m^{-2}$ . All the allometric exponents, the intercepts and the 95% confidence intervals were evaluated by Model Type II (reduced major axis i.e. RMA, 1.17version) regression of the log-transformed data. The

### References

1. Kleiber M (1932) Body size and metabolism. *Hilgardia* 6: 315–332.
2. Peters RH (1983) The ecological implications of body size. Cambridge, UK: Cambridge University Press.
3. Brown JH, Gillooly JF, Allen PA, Savage VM, West GB (2004) Toward a metabolic theory of ecology. *Ecology* 85: 1771–1789.
4. Damuth J (1981) Population density and body size in mammals. *Nature*, 290: 699–700.
5. Damuth J (1987) Interspecific allometry of population-density in mammals and other animals: the independence of body-mass and population energy-use. *Biol J Linn Soc* 31: 193–246.
6. West GB, Brown JH, Enquist BJ (1997) A general model for the origin of allometric scaling laws in biology. *Science* 276: 122–126.

95% confidence intervals were used to assess whether an empirically calculated allometric exponent included the predicted theoretical values [32].

### Supporting Information

**Dataset S1** The dataset S1 used in the analysis of our paper. Found at: doi:10.1371/journal.pone.0001799.s001 (0.11 MB PDF)

**Dataset S2** The dataset S2 was used in the analysis of our paper. Found at: doi:10.1371/journal.pone.0001799.s002 (0.13 MB PDF)

**Dataset S3** The dataset S3 was used in the analysis of our paper. Found at: doi:10.1371/journal.pone.0001799.s003 (0.04 MB PDF)

### Acknowledgments

We thank Xiao-Ping Wei, Dong-xiu Li, Xiao-Yan Zhang, Hui-Min Yang and Lian Yang for assistance with the field experiments.

### Author Contributions

Conceived and designed the experiments: JL JD GW. Performed the experiments: JD TL JL ZY MJ QZ. Analyzed the data: JD. Contributed reagents/materials/analysis tools: JL CZ. Wrote the paper: JL JD. Other: Revised the paper: TL GW. Teaching technique: JD.

7. West GB, Brown JH, Enquist BJ (1999a) The fourth dimension of life: fractal geometry and allometric scaling of organism. *Science*, 284: 1677–1679.
8. West GB, Brown JH, Enquist BJ (1999b) A general model for the structure and allometry of plant vascular systems. *Nature* 400: 664–667.
9. Enquist BJ, Brown JH, West GB (1998) Allometric scaling of plants energetics and population density. *Nature* 395: 163–165.
10. Enquist BJ, Brown JH, West GB (1999) Plant energetics and population density. *Nature* 398: 573.
11. Enquist BJ, Niklas KJ (2001) Invariant scaling relations across tree-dominated communities. *Nature* 410: 655–660.
12. Niklas KJ, Midgley JJ, Enquist BJ (2003) A general model for mass-growth-density relations across tree-dominated communities. *Evol Ecol Res* 5: 459–468.

13. Dodds PS, Rothman DH, Weitz JS (2001) Re-examination of the “3/4-law” of metabolism. *J Theor Biol* 209: 9–27.
14. Kozłowski J, Konarzewski M (2004) Is West, Brown and Enquist’s model of allometric scaling mathematically correct and biologically relevant? *Funct Ecol* 18: 283–289.
15. Kozłowski J, Konarzewski M (2005) West, Brown and Enquist’s model of allometric scaling again: the same questions remain. *Funct Ecol* 19: 739–743.
16. O’Connor MP, Kemp ST, Agosta SJ, Hansen F, Sieg AE, et al. (2007) Reconsidering the mechanistic basis of the metabolic theory of ecology. *Oikos* 116: 1058–1072.
17. White CR, Seymour RS (2003) Mammalian basal metabolic rate is proportional to body mass<sup>2/3</sup>. *Proc Natl Acad Sci U S A* 100: 4046–4049.
18. White J (1980) Demographic factors in populations of plants. in: OTSolbrig, ed. *Demography and evolution in plant populations*. Berkeley, California, USA: University of California Press. pp 21–48.
19. Hutchings MJ (1983) Ecology’s law in search of a theory. *New Sci* 98: 765–767.
20. Deng JM, Wang GX, Morris EC, Wei XP, Li DX, et al. (2006a) Plant mass-density relationship along a moisture gradient in north-west China. *J Ecol* 94: 953–958.
21. Li HT, Han XG, Wu JG (2006) Variant scaling relationship for mass-density across tree-dominated communities. *J Integr P Biol* 48: 268–277.
22. Pretzsch H (2006) Species-specific allometric scaling under self-thinning: evidence from long-term plots in forest stands. *Oecologia* 146: 572–583.
23. Ricklefs RE (2003) Is rate of ontogenetic growth constrained by resource supply or tissue growth potential? A comment on West *et al.*’s model. *Funct Ecol* 17: 384–393.
24. Reich PB, Tjoelker MG, Machado JL, Oleksyn J (2006) Universal scaling of respiratory metabolism, size and nitrogen in plants. *Nature* 439: 457–461.
25. Duncan RP, Forsyth DM, Hone J (2007) Testing the Metabolic theory of ecology: allometric scaling exponents in mammals. *Ecology* 88: 324–333.
26. White CR, Cassey P, Blackburn TM (2007) Allometric exponents do not support a universal metabolic allometry. *Ecology* 88: 315–323.
27. Weller DE (1987) Self-thinning exponent correlated with allometric measures of plant geometry. *Ecology* 64: 813–821.
28. Lonsdale WM (1990) The self-thinning rule: dead or alive? *Ecology* 71: 1373–1388.
29. Morris EC (2002) Self-thinning lines differ with fertility level. *Ecol Res* 17: 17–28.
30. Roderick ML, Barnes B (2004) Self-thinning of plant populations from a dynamic viewpoint. *Funct Ecol* 18: 197–203.
31. Liu J, Wei L, Wang CM, Wang GX, Wei XP (2006) Effect of water deficit on self-thinning line in even-aged monocultures of spring wheat (*Triticum aestivum* L.). *J Integr P Biol* 48: 415–419.
32. Niklas KJ, Enquist BJ (2001) Invariant scaling relationships for interspecific plant biomass production rates and body size. *Proc Natl Acad Sci U S A* 98: 2922–2927.
33. Niklas KJ, Enquist BJ (2002a) On the vegetative biomass partitioning of seed plant leaves, stems, and roots. *Am Nat* 5: 482–497.
34. Niklas KJ, Enquist BJ (2002b) Canonical rules for plant organ biomass partitioning and annual allocation. *Am J Bot* 89: 812–819.
35. Enquist BJ, Niklas KJ (2002) Global allocation rules for patterns of biomass partitioning in seed plants. *Science* 295: 1517–1520.
36. Enquist BJ (2003) *Scaling the macroecological and evolutionary implications of size and metabolism within and across plant taxa*. Birmingham, UK: Blackwell publishing.
37. Yoda K, Kira T, Ogawa H, Hozumi K (1963) Self-thinning in overcrowded pure stands under cultivated and natural conditions. (Intraspecific competition among higher plants XI). *Journal of the Institute of Polytechnics, Osaka City University, Series D* 14: 107–129.
38. White J, Harper JL (1970) Correlated changes in plant size and number in plant populations. *J Ecol* 58: 467–485.
39. Begon M, Harper JL, Townsend CR (1996) *Ecology* 3<sup>rd</sup> ed. Oxford, UK: Blackwell Science Ltd.
40. Bi HQ, Wan GH, Turvey ND (2000) Estimating the self-thinning boundary line as a density-dependent stochastic biomass frontier. *Ecology* 81: 1477–1483.
41. Price CA, Enquist BJ (2007) Scaling mass and morphology in leaves: an extension of the WBE model. *Ecology* 88: 1132–1141.
42. Weller DE (1991) The self-thinning rule: dead or unsupported? A reply to Lonsdale. *Ecology* 72: 747–750.
43. Osawa A, Allen RB (1993) Allometric theory explains self-thinning relationships of mountain beech and red pine. *Ecology* 74: 1020–1032.
44. Reynolds JH, Ford ED (2005) Improving competition representation in theoretical models of self-thinning: a critical review. *J Ecol* 93: 362–372.
45. Wang G, Zhang DY (1996) *Theories of biological competition*. In: *Intraspecific competition*. Xi’an, Shanxi, China: Science and technology press. pp 28–43.
46. Wang G, Yuan JL, Wang XZ, Xiao S, Huang WB (2004) Competitive regulation of plant allometry and a generalized model for the plant self-thinning process. *J Theor Biol* 66: 1875–1885.
47. Bokma F (2004) Evidence against universal metabolic allometry. *Funct Ecol* 18: 184–187.
48. Cry H, Walker SC (2004) An illusion of Mechanistic understanding. *Ecology* 85: 1802–1804.
49. Anderson KJ, Jetz W (2005) The broad-scale ecology of energy expenditure of endotherms. *Ecol Lett* 8: 310–318.
50. Loeuille N, Michel L (2006) Evolution of body size in food webs: does the energetic equivalence rule hold? *Ecol Lett* 9: 171–178.
51. Kleiman D, Aarssen LW (2007) The leaf size/number trade-off in trees. *J Ecol* 95: 376–382.
52. Long JN, Smith FW (1984) Relation between size and density in developing stands: a description and possible mechanisms. *Fores Ecol Mana* 7: 191–206.
53. Richards RA (1991) Crop improvement for temperate Australia: future opportunities. *Field Crop Res* 26: 141–169.
54. Zhang DY, Sun GJ, Jiang XH (1999) Donald’s ideotype and growth redundancy: a game theoretical analysis. *Field Crop Res* 61: 179–187.
55. Banavar JR, Damuth J, Maritan A, Rinaldo A (2002) Supply-demand balance and metabolic scaling. *Proc Natl Acad Sci U S A* 99: 10506–10509.
56. Lyshede OB (1979) Xeromorphic features of three stem assimilating in relation to their ecology. *Bot J Lin Soc* 78: 85–98.
57. Gong CM, Gao XW, Cheng DL, Wang GX (2006) C<sub>4</sub> photosynthetic characteristics and antioxidative protection of C<sub>3</sub> desert shrub *Hedysarum scoparium* in northwest China. *Pakistan J Bot* 38: 647–661.
58. Chen BM, Wang GX, Cheng DL, Deng JM, Peng SL, et al. (2007) Vegetation change and soil nutrient distribution along an oasis-desert transitional zone in Northwestern China. *J Integr P Biol* 49: 1537–1547.
59. Luo TX (1996) *Patterns of biological production and its mathematical 50 models for main forest types of China* (in Chinese). Committee of Synthesis Investigation of Natural Resources, the Chinese Academy of Sciences, Beijing.
60. Deng JM, Zhang XY, Wang GX, Wei XP, Zhao CM (2006b) The relationship between the energy use and densities of spring wheat under the different moisture levels (In Chinese with English abstract). *Acta Ecologica Sinica* 26: 2282–2287.
