# Supplementary material for: Trade-Offs between the Metabolic Rate and Population Density of Plants
Source: PubMed Central journal article supplement (PMC2265546; doi:10.1371/journal.pone.0001799), 2008-03-19
Supplement: pone.0001799.s001.pdf [file pone.0001799.s001.pdf]

| <b>Dataset S1. Tree data</b>         |         |               |              |         |            |              |                        |
|--------------------------------------|---------|---------------|--------------|---------|------------|--------------|------------------------|
| Province/Sites                       | Alt.(m) | Long.(E,deg.) | Lat.(N,deg.) | Born    | L(g/no.)   | M(g/no.)     | D(no./m <sup>2</sup> ) |
| <b>Boreal/temperate Larix forest</b> |         |               |              |         |            |              |                        |
| Heilongjiang                         | 800     | 129.40        | 44.30        | natural | 17538.0711 | 610989.8477  | 0.0394                 |
| Heilongjiang                         | 550     | 124.70        | 52.30        | natural | 9312.7148  | 298384.8797  | 0.0291                 |
| Heilongjiang                         | 441     | 126.60        | 51.70        | natural | 2570.1754  | 82175.4386   | 0.1140                 |
| Heilongjiang                         | 590     | 131.80        | 46.50        | natural | 13939.3939 | 422030.3030  | 0.0330                 |
| Heilongjiang                         | 800     | 130.20        | 44.10        | natural | 14375.0000 | 450643.3824  | 0.0544                 |
| Heilongjiang                         | 590     | 125.20        | 51.40        | natural | 9016.6667  | 318266.6667  | 0.0600                 |
| Heilongjiang                         | 876     | 124.20        | 52.60        | natural | 2146.9860  | 50235.3427   | 0.2422                 |
| Heilongjiang                         | 500     | 128.40        | 49.50        | natural | 5896.2963  | 198770.3704  | 0.0675                 |
| Jilin                                | 880     | 128.10        | 42.40        | natural | 28991.8256 | 655231.6076  | 0.0367                 |
| Jilin                                | 900     | 128.27        | 42.75        | natural | 14055.5556 | 683583.3333  | 0.0360                 |
| Jilin                                | 1075    | 127.30        | 42.20        | natural | 48219.1781 | 1095525.1142 | 0.0219                 |
| Mongolia                             | 650     | 124.50        | 52.50        | natural | 5675.0000  | 136450.0000  | 0.0400                 |
| Mongolia                             | 700     | 123.00        | 50.33        | natural | 2261.1940  | 73067.1642   | 0.1340                 |
| Mongolia                             | 800     | 120.80        | 52.20        | natural | 5224.3590  | 221474.3590  | 0.0624                 |
| Mongolia                             | 800     | 121.70        | 50.40        | natural | 790.9029   | 25101.8330   | 0.2946                 |
| Mongolia                             | 781     | 121.50        | 50.80        | natural | 6270.0535  | 222847.5936  | 0.0748                 |
| Mongolia                             | 637     | 124.00        | 50.40        | natural | 6477.8761  | 223946.9027  | 0.0565                 |
| Mongolia                             | 820     | 121.40        | 48.40        | natural | 530.9370   | 15162.5737   | 0.7289                 |
| Mongolia                             | 1280    | 119.90        | 47.10        | natural | 1786.6435  | 56418.0399   | 0.1153                 |
| Mongolia                             | 812     | 121.00        | 50.90        | natural | 787.7261   | 23531.0282   | 0.4367                 |
| Mongolia                             | 676     | 123.20        | 50.50        | natural | 356.2728   | 10095.9196   | 0.6568                 |
| Mongolia                             | 774     | 121.50        | 51.30        | natural | 143.1702   | 3841.2467    | 2.0535                 |
| Mongolia                             | 810     | 122.40        | 50.60        | natural | 1355.7105  | 41464.6905   | 0.2294                 |
| Mongolia                             | 887     | 121.60        | 50.00        | natural | 1043.7619  | 31291.1117   | 0.3679                 |
| Mongolia                             | 660     | 122.20        | 52.00        | natural | 276.0657   | 7787.6220    | 1.5576                 |
| Mongolia                             | 660     | 122.20        | 52.30        | natural | 193.2160   | 5209.9614    | 1.1645                 |
| Mongolia                             | 737     | 120.80        | 51.30        | natural | 214.1680   | 5940.3117    | 1.5782                 |
| Mongolia                             | 846     | 121.30        | 49.50        | natural | 933.1683   | 27985.1485   | 0.4040                 |
| Shanxi                               | 2212    | 111.57        | 37.86        | natural | 2990.7975  | 119907.9755  | 0.0652                 |
| Shanxi                               | 2123    | 111.88        | 38.67        | natural | 2736.2482  | 111001.4104  | 0.0709                 |
| Shanxi                               | 2299    | 112.04        | 38.84        | natural | 1520.9472  | 63315.1184   | 0.1098                 |
| Shanxi                               | 2278    | 112.12        | 38.95        | natural | 3979.5918  | 158486.3946  | 0.0588                 |
| Shanxi                               | 2367    | 113.64        | 39.16        | natural | 3013.1004  | 102366.8122  | 0.1145                 |
| Shanxi                               | 2055    | 111.46        | 37.91        | natural | 2482.8874  | 108662.1033  | 0.1607                 |
| Shanxi                               | 2300    | 112.20        | 39.00        | natural | 2019.3237  | 83444.4444   | 0.2070                 |
| Shanxi                               | 1850    | 111.50        | 37.83        | natural | 1962.1422  | 71772.8532   | 0.2166                 |
| Sichuan                              | 3638    | 102.40        | 30.90        | natural | 10533.3333 | 388693.3333  | 0.0375                 |
| Sichuan                              | 3600    | 102.30        | 30.90        | natural | 10934.5794 | 372383.1776  | 0.0428                 |
| Sinkiang                             | 1650    | 88.10         | 47.80        | natural | 203.6247   | 5536.2473    | 0.9380                 |
| Sinkiang                             | 2100    | 93.00         | 43.80        | natural | 4157.7061  | 135008.9606  | 0.1116                 |
| Sinkiang                             | 1900    | 86.40         | 48.10        | natural | 4191.9192  | 108976.1249  | 0.2178                 |

|          |      |       |       |         |            |             |        |
|----------|------|-------|-------|---------|------------|-------------|--------|
| Sinkiang | 1883 | 86.90 | 48.00 | natural | 7733.4630  | 261994.1634 | 0.1028 |
| Sinkiang | 1700 | 86.90 | 47.70 | natural | 9006.2668  | 330572.9633 | 0.1117 |
| Sinkiang | 1946 | 88.70 | 47.80 | natural | 3842.2535  | 109357.7465 | 0.1775 |
| Sinkiang | 1871 | 89.40 | 47.00 | natural | 10673.6243 | 366574.9526 | 0.1054 |
| Sinkiang | 1989 | 89.30 | 47.10 | natural | 2636.7373  | 85074.2966  | 0.3163 |
| Sinkiang | 2298 | 93.10 | 42.80 | natural | 8448.1394  | 242565.3207 | 0.1263 |
| Yunnan   | 4240 | 99.22 | 28.62 | natural | 9976.6355  | 355210.2804 | 0.0428 |

**Boreal/alpine Picea-Abies forest**

|              |      |        |       |         |            |              |        |
|--------------|------|--------|-------|---------|------------|--------------|--------|
| Gansu        | 3280 | 103.50 | 34.60 | natural | 8746.2006  | 88529.6353   | 0.2632 |
| Hebei        | 1536 | 117.20 | 42.40 | natural | 4401.7632  | 58280.8564   | 0.1588 |
| Heilongjiang | 508  | 131.80 | 46.50 | natural | 4938.0300  | 82335.2903   | 0.1533 |
| Heilongjiang | 1017 | 129.40 | 44.30 | natural | 19635.4992 | 307496.0380  | 0.0631 |
| Heilongjiang | 950  | 124.20 | 52.60 | natural | 6720.4696  | 94057.2267   | 0.1363 |
| Heilongjiang | 410  | 125.40 | 52.40 | natural | 3765.8537  | 66809.7561   | 0.1025 |
| Heilongjiang | 487  | 124.50 | 52.50 | natural | 3537.5869  | 62867.9722   | 0.1583 |
| Heilongjiang | 523  | 124.70 | 52.30 | natural | 6702.5641  | 104948.7179  | 0.1950 |
| Heilongjiang | 800  | 128.90 | 47.70 | natural | 15490.1961 | 221514.1612  | 0.0918 |
| Hubei        | 3300 | 110.30 | 31.00 | natural | 9027.2374  | 123297.6654  | 0.1028 |
| Hubei        | 3260 | 110.70 | 32.00 | natural | 15894.7368 | 220035.0877  | 0.0570 |
| Hubei        | 3200 | 110.60 | 31.70 | natural | 18440.1709 | 262820.5128  | 0.0468 |
| Hubei        | 3200 | 110.70 | 31.20 | natural | 5349.4874  | 71957.1295   | 0.1073 |
| Jilin        | 1286 | 128.10 | 42.40 | natural | 17638.2488 | 296025.3456  | 0.0868 |
| Jilin        | 900  | 129.70 | 43.30 | natural | 15502.7174 | 235652.1739  | 0.0736 |
| Mongolia     | 1300 | 117.22 | 43.51 | natural | 10235.2941 | 127124.1830  | 0.0765 |
| Mongolia     | 2384 | 105.90 | 38.77 | natural | 9685.6810  | 57211.8743   | 0.1718 |
| Shanxi       | 2415 | 111.83 | 38.73 | natural | 5646.0263  | 75148.7079   | 0.2051 |
| Shanxi       | 2475 | 111.88 | 38.75 | natural | 5337.1593  | 71061.6930   | 0.1394 |
| Shanxi       | 2327 | 111.88 | 38.77 | natural | 6985.5072  | 93739.1304   | 0.1035 |
| Shanxi       | 2276 | 111.93 | 38.79 | natural | 4319.8681  | 57065.1278   | 0.1213 |
| Shanxi       | 2243 | 112.03 | 38.89 | natural | 4188.8620  | 55746.5698   | 0.1239 |
| Shanxi       | 2490 | 113.57 | 39.12 | natural | 5525.3490  | 73490.0808   | 0.1361 |
| Shanxi       | 2310 | 112.20 | 39.50 | natural | 3159.4906  | 41485.7489   | 0.3298 |
| Shanxi       | 2680 | 107.90 | 33.50 | natural | 7603.3553  | 107789.0953  | 0.1669 |
| Shanxi       | 2250 | 108.30 | 33.30 | natural | 13628.0488 | 213460.3659  | 0.0656 |
| Shanxi       | 2772 | 107.70 | 33.90 | natural | 9557.6037  | 134976.9585  | 0.1085 |
| Shanxi       | 2770 | 107.50 | 33.20 | natural | 8138.7182  | 115557.5066  | 0.1139 |
| Sichuan      | 3550 | 98.80  | 31.20 | natural | 16461.5385 | 375288.4615  | 0.0520 |
| Sichuan      | 3750 | 101.60 | 31.70 | natural | 20450.2370 | 738175.3555  | 0.0422 |
| Sichuan      | 3675 | 101.10 | 31.00 | natural | 20367.5048 | 626460.3482  | 0.0517 |
| Sichuan      | 3075 | 103.00 | 28.80 | natural | 20706.6381 | 1383062.0985 | 0.0467 |
| Sichuan      | 3480 | 102.90 | 32.00 | natural | 20075.9013 | 665313.0930  | 0.0527 |
| Sichuan      | 3633 | 101.50 | 29.00 | natural | 21838.4401 | 847771.5877  | 0.0359 |
| Sichuan      | 2804 | 103.10 | 31.40 | natural | 19861.3518 | 556863.0849  | 0.0577 |
| Sichuan      | 3000 | 102.80 | 31.60 | natural | 16830.6011 | 457117.4863  | 0.0732 |

|         |      |        |       |         |            |             |        |
|---------|------|--------|-------|---------|------------|-------------|--------|
| Sichuan | 3475 | 102.60 | 32.00 | natural | 22685.8513 | 956834.5324 | 0.0417 |
| Sichuan | 3638 | 102.20 | 31.90 | natural | 21311.9534 | 820699.7085 | 0.0343 |
| Sichuan | 3500 | 102.20 | 31.80 | natural | 16783.6812 | 428937.3814 | 0.1054 |
| Sichuan | 3178 | 103.80 | 31.60 | natural | 17687.8613 | 414523.1214 | 0.0692 |
| Sichuan | 3722 | 101.20 | 27.90 | natural | 16083.7070 | 394439.4619 | 0.0669 |
| Sichuan | 3200 | 103.77 | 33.25 | natural | 15754.2768 | 378195.9565 | 0.0643 |
| Sichuan | 3200 | 103.76 | 32.60 | natural | 16156.2500 | 362546.8750 | 0.0640 |
| Sichuan | 3200 | 103.75 | 33.30 | natural | 15287.3563 | 326724.1379 | 0.0696 |
| Sichuan | 3200 | 103.76 | 33.52 | natural | 13547.6718 | 387982.2616 | 0.0451 |
| Sichuan | 3200 | 104.90 | 33.52 | natural | 16490.5660 | 490150.9434 | 0.0530 |
| Sichuan | 3195 | 103.67 | 33.57 | natural | 16882.5911 | 472408.9069 | 0.0494 |
| Sichuan | 3200 | 103.73 | 33.58 | natural | 14748.9540 | 335711.2971 | 0.0478 |
| Sichuan | 3480 | 103.33 | 33.60 | natural | 15691.6427 | 344178.6744 | 0.0694 |
| Sichuan | 3200 | 103.74 | 33.60 | natural | 12978.7234 | 311042.5532 | 0.0470 |
| Sichuan | 3252 | 103.73 | 33.62 | natural | 12909.7606 | 337974.2173 | 0.0543 |
| Sichuan | 3200 | 103.76 | 33.63 | natural | 23538.4615 | 971730.7692 | 0.0260 |
| Sichuan | 3142 | 103.75 | 33.65 | natural | 15944.4444 | 460597.2222 | 0.0720 |
| Sichuan | 3204 | 103.77 | 33.67 | natural | 13321.6169 | 346186.2917 | 0.0569 |
| Sichuan | 3200 | 104.55 | 33.55 | natural | 18709.6774 | 513241.9355 | 0.0620 |
| Sichuan | 3190 | 104.66 | 33.57 | natural | 14713.3758 | 387500.0000 | 0.0628 |
| Sichuan | 3200 | 104.04 | 33.67 | natural | 17735.2941 | 440367.6471 | 0.0680 |
| Sichuan | 3200 | 104.03 | 33.01 | natural | 17094.9721 | 550782.1229 | 0.0358 |
| Sichuan | 3200 | 104.10 | 33.38 | natural | 12362.0934 | 227072.1358 | 0.0707 |
| Sichuan | 3200 | 103.88 | 33.42 | natural | 15308.8235 | 329455.8824 | 0.0680 |
| Sichuan | 3421 | 103.53 | 33.47 | natural | 15366.2182 | 337967.1151 | 0.0669 |
| Sichuan | 3238 | 103.70 | 33.23 | natural | 16862.7451 | 458322.4401 | 0.0459 |
| Sichuan | 3200 | 104.12 | 33.07 | natural | 16901.9608 | 525274.5098 | 0.0510 |
| Sichuan | 3200 | 104.41 | 33.60 | natural | 15020.3252 | 410853.6585 | 0.0492 |
| Sichuan | 3200 | 104.05 | 33.63 | natural | 15444.4444 | 417740.7407 | 0.0540 |
| Sichuan | 3200 | 104.05 | 33.65 | natural | 17538.9948 | 528526.8631 | 0.0577 |
| Sichuan | 3200 | 104.03 | 33.68 | natural | 16341.0853 | 412868.2171 | 0.0645 |
| Sichuan | 3188 | 103.92 | 33.17 | natural | 15703.4221 | 410684.4106 | 0.0526 |
| Sichuan | 3200 | 104.15 | 33.33 | natural | 12950.8197 | 301762.2951 | 0.0488 |
| Sichuan | 3500 | 103.32 | 33.38 | natural | 16444.4444 | 350185.1852 | 0.0540 |
| Sichuan | 3500 | 103.34 | 33.53 | natural | 15575.6579 | 347878.2895 | 0.0608 |
| Sichuan | 3500 | 103.30 | 33.55 | natural | 15874.6356 | 354373.1778 | 0.0686 |
| Sichuan | 3320 | 103.61 | 33.32 | natural | 18051.0441 | 512227.3782 | 0.0431 |
| Sichuan | 3371 | 103.47 | 33.33 | natural | 16996.9970 | 389909.9099 | 0.0666 |
| Sichuan | 3500 | 103.41 | 33.35 | natural | 19144.9275 | 521855.0725 | 0.0690 |
| Sichuan | 3500 | 103.36 | 33.37 | natural | 17793.8517 | 454068.7161 | 0.0553 |
| Sichuan | 3436 | 103.50 | 33.38 | natural | 15972.9272 | 363807.1066 | 0.0591 |
| Sichuan | 3500 | 103.37 | 33.40 | natural | 16345.2566 | 368227.0607 | 0.0643 |
| Sichuan | 3450 | 103.49 | 33.43 | natural | 16888.1119 | 408496.5035 | 0.0572 |
| Sichuan | 3433 | 103.46 | 33.47 | natural | 17249.5756 | 452767.4024 | 0.0589 |

|         |      |        |       |         |             |              |        |
|---------|------|--------|-------|---------|-------------|--------------|--------|
| Sichuan | 3433 | 103.54 | 33.48 | natural | 14329.5019  | 270485.3129  | 0.0783 |
| Sichuan | 3500 | 103.39 | 33.62 | natural | 14192.7711  | 316337.3494  | 0.0830 |
| Sichuan | 3275 | 103.66 | 33.53 | natural | 18094.3396  | 499773.5849  | 0.0530 |
| Sichuan | 3500 | 103.30 | 33.85 | natural | 13460.8379  | 304772.3133  | 0.0549 |
| Sichuan | 3500 | 103.34 | 33.76 | natural | 15085.8034  | 294617.7847  | 0.0641 |
| Sichuan | 3500 | 102.93 | 34.20 | natural | 12721.3115  | 240950.8197  | 0.0915 |
| Sichuan | 3500 | 102.93 | 34.20 | natural | 12721.3115  | 240950.8197  | 0.0915 |
| Sichuan | 3243 | 103.82 | 33.27 | natural | 15729.3869  | 384799.1543  | 0.0473 |
| Sichuan | 3238 | 103.66 | 33.28 | natural | 13453.4161  | 235937.8882  | 0.0805 |
| Sichuan | 3500 | 103.30 | 33.52 | natural | 15271.0843  | 309171.6867  | 0.0664 |
| Sichuan | 3238 | 103.62 | 33.55 | natural | 18185.5670  | 535010.3093  | 0.0485 |
| Sichuan | 3500 | 103.32 | 33.57 | natural | 16686.9301  | 406671.7325  | 0.0658 |
| Sichuan | 3500 | 102.82 | 34.17 | natural | 11799.5690  | 189170.2586  | 0.0928 |
| Sichuan | 3500 | 103.28 | 33.58 | natural | 14756.7568  | 314445.9459  | 0.0740 |
| Sichuan | 3410 | 103.57 | 33.50 | natural | 15309.8592  | 311746.4789  | 0.0710 |
| Sichuan | 3500 | 105.40 | 33.52 | natural | 14133.6898  | 221133.6898  | 0.1870 |
| Sichuan | 3500 | 103.54 | 33.52 | natural | 18078.1250  | 463875.0000  | 0.0640 |
| Sichuan | 3500 | 102.92 | 34.25 | natural | 12085.7988  | 199748.5207  | 0.0676 |
| Sichuan | 3450 | 103.50 | 33.45 | natural | 13473.5202  | 292523.3645  | 0.0642 |
| Sichuan | 3325 | 103.60 | 32.60 | natural | 21452.7845  | 734309.9274  | 0.0413 |
| Sichuan | 3273 | 103.55 | 31.50 | natural | 16792.4528  | 158502.3585  | 0.0848 |
| Sichuan | 2900 | 102.70 | 30.10 | natural | 9229.0988   | 85678.6102   | 0.1842 |
| Sichuan | 3207 | 103.73 | 33.07 | natural | 10637.7079  | 113354.8983  | 0.1082 |
| Sichuan | 3208 | 102.33 | 30.90 | natural | 19177.0574  | 680299.2519  | 0.0401 |
| Sichuan | 3800 | 100.30 | 30.90 | natural | 24691.3580  | 1125135.8025 | 0.0405 |
| Sichuan | 3758 | 101.00 | 30.00 | natural | 17584.8303  | 433373.2535  | 0.0501 |
| Sichuan | 2805 | 103.10 | 30.90 | natural | 16863.3540  | 440559.0062  | 0.0644 |
| Tibet   | 2750 | 95.88  | 29.92 | natural | 225116.2791 | 9107790.6977 | 0.0172 |
| Tibet   | 3500 | 97.40  | 28.60 | natural | 30168.7764  | 2071856.5401 | 0.0237 |
| Tibet   | 3900 | 97.10  | 31.10 | natural | 12565.7071  | 168585.7322  | 0.0799 |
| Tibet   | 4150 | 94.70  | 30.90 | natural | 23319.6721  | 605450.8197  | 0.0244 |
| Tibet   | 2620 | 94.90  | 30.20 | natural | 16741.2141  | 316677.3163  | 0.0313 |
| Tibet   | 3237 | 95.70  | 29.80 | natural | 21422.9249  | 1829486.1660 | 0.0253 |
| Tibet   | 3900 | 98.20  | 31.50 | natural | 24720.0000  | 850000.0000  | 0.0250 |
| Tibet   | 3750 | 94.30  | 31.40 | natural | 20702.5761  | 376299.7658  | 0.0427 |
| Tibet   | 3800 | 96.50  | 31.20 | natural | 21305.7325  | 421305.7325  | 0.0314 |
| Tibet   | 3982 | 95.80  | 30.70 | natural | 19540.8163  | 375892.8571  | 0.0392 |
| Tibet   | 4180 | 98.50  | 29.60 | natural | 22204.1763  | 482134.5708  | 0.0431 |
| Tibet   | 3999 | 97.80  | 29.60 | natural | 19667.4058  | 483148.5588  | 0.0451 |
| Tibet   | 3642 | 93.30  | 29.90 | natural | 19192.5466  | 736925.4658  | 0.0322 |
| Tibet   | 3631 | 94.30  | 29.50 | natural | 21588.7850  | 1112429.9065 | 0.0214 |
| Tibet   | 3274 | 94.10  | 29.20 | natural | 18805.9701  | 1033880.5970 | 0.0268 |
| Tibet   | 3428 | 94.10  | 29.70 | natural | 23675.2137  | 1425683.7607 | 0.0234 |
| Tibet   | 3540 | 94.70  | 29.80 | natural | 17200.0000  | 585873.6842  | 0.0475 |

|          |      |        |       |         |            |              |        |
|----------|------|--------|-------|---------|------------|--------------|--------|
| Tibet    | 2590 | 85.90  | 28.10 | natural | 24345.2381 | 1912738.0952 | 0.0168 |
| Tibet    | 2786 | 85.20  | 28.90 | natural | 6238.1853  | 470283.5539  | 0.0529 |
| Tibet    | 3398 | 85.20  | 28.90 | natural | 11155.3785 | 320996.0159  | 0.0502 |
| Tibet    | 3350 | 85.90  | 27.90 | natural | 26480.0000 | 2026800.0000 | 0.0125 |
| Tibet    | 2710 | 85.90  | 27.90 | natural | 19136.3636 | 1423818.1818 | 0.0220 |
| Tibet    | 3835 | 93.10  | 29.00 | natural | 23890.9091 | 803636.3636  | 0.0275 |
| Tibet    | 2000 | 96.70  | 28.70 | natural | 21952.6627 | 1936094.6746 | 0.0169 |
| Tibet    | 3616 | 97.00  | 28.40 | natural | 25203.4884 | 1046104.6512 | 0.0344 |
| Tibet    | 3600 | 93.80  | 29.90 | natural | 17517.7305 | 922375.8865  | 0.0282 |
| Sinkiang | 2173 | 88.00  | 44.20 | natural | 19286.6407 | 257380.0259  | 0.0771 |
| Sinkiang | 1870 | 82.20  | 43.40 | natural | 45529.5950 | 721697.8193  | 0.0642 |
| Sinkiang | 1895 | 84.60  | 43.20 | natural | 81142.1320 | 1418807.1066 | 0.0394 |
| Sinkiang | 2197 | 89.10  | 44.00 | natural | 35287.5696 | 513562.1521  | 0.0539 |
| Sinkiang | 2050 | 86.20  | 44.30 | natural | 24402.0101 | 336864.3216  | 0.0995 |
| Sinkiang | 2210 | 90.30  | 43.80 | natural | 12497.5799 | 158170.3775  | 0.1033 |
| Sinkiang | 2240 | 85.60  | 44.30 | natural | 2772.8762  | 27078.3968   | 0.3967 |
| Sinkiang | 2133 | 85.60  | 44.30 | natural | 4123.3407  | 55752.2124   | 0.3616 |
| Sinkiang | 2500 | 81.80  | 43.20 | natural | 85815.3846 | 1467415.3846 | 0.0325 |
| Sinkiang | 2285 | 87.70  | 43.90 | natural | 25869.5652 | 368030.6905  | 0.0782 |
| Sinkiang | 2200 | 87.13  | 43.03 | natural | 13267.8133 | 178624.0786  | 0.1221 |
| Sinkiang | 2170 | 88.30  | 43.30 | natural | 14665.5377 | 186104.9958  | 0.1181 |
| Sinkiang | 2283 | 81.10  | 43.10 | natural | 29900.6211 | 439652.1739  | 0.0805 |
| Yunnan   | 3390 | 98.96  | 27.45 | natural | 22025.5183 | 457783.0941  | 0.0627 |
| Yunnan   | 2810 | 98.96  | 27.53 | natural | 18101.0453 | 277996.5157  | 0.0574 |
| Yunnan   | 3590 | 99.20  | 27.53 | natural | 19678.6758 | 330866.6018  | 0.1027 |
| Yunnan   | 3780 | 99.14  | 27.82 | natural | 18848.1338 | 300913.7709  | 0.1554 |
| Yunnan   | 3220 | 99.26  | 27.82 | natural | 26164.8746 | 1784050.1792 | 0.0279 |
| Yunnan   | 3790 | 99.15  | 28.00 | natural | 24482.7586 | 953029.5567  | 0.0406 |
| Yunnan   | 3720 | 98.96  | 28.18 | natural | 26328.1250 | 2070546.8750 | 0.0256 |
| Yunnan   | 3420 | 98.84  | 28.53 | natural | 25405.4054 | 1110765.7658 | 0.0222 |
| Yunnan   | 4120 | 98.65  | 28.62 | natural | 25911.3300 | 1497142.8571 | 0.0203 |
| Yunnan   | 4200 | 99.02  | 28.90 | natural | 20294.6593 | 356408.8398  | 0.0543 |
| Yunnan   | 3720 | 99.50  | 26.95 | natural | 23663.5945 | 631129.0323  | 0.0434 |
| Yunnan   | 3220 | 99.62  | 27.02 | natural | 26225.1656 | 1879536.4238 | 0.0151 |
| Yunnan   | 3240 | 99.44  | 27.10 | natural | 24662.3094 | 836296.2963  | 0.0459 |
| Yunnan   | 3120 | 99.57  | 27.17 | natural | 24778.4200 | 869460.5010  | 0.0519 |
| Yunnan   | 3880 | 100.20 | 26.80 | natural | 21207.2435 | 434587.5252  | 0.0497 |
| Yunnan   | 3820 | 100.66 | 27.32 | natural | 21837.6068 | 444017.0940  | 0.0468 |
| Yunnan   | 3500 | 100.60 | 27.53 | natural | 26200.0000 | 1829100.0000 | 0.0200 |
| Yunnan   | 4100 | 100.60 | 27.67 | natural | 9818.1818  | 133750.0000  | 0.0880 |
| Yunnan   | 3260 | 99.34  | 27.36 | natural | 24904.2146 | 1072375.4789 | 0.0261 |
| Yunnan   | 3559 | 99.20  | 27.10 | natural | 16743.4716 | 416052.2273  | 0.0651 |
| Yunnan   | 3055 | 99.38  | 26.14 | natural | 24939.7590 | 966947.7912  | 0.0249 |
| Yunnan   | 3200 | 99.70  | 27.70 | natural | 22953.2164 | 839561.4035  | 0.0342 |

**Boreal *Pinus sylvestris* var. *mongolica* forest**

|              |     |        |       |         |            |             |        |
|--------------|-----|--------|-------|---------|------------|-------------|--------|
| Heilongjiang | 500 | 124.70 | 52.30 | natural | 9443.1555  | 295661.2529 | 0.0431 |
| Heilongjiang | 608 | 126.60 | 51.70 | natural | 5122.4707  | 105665.6017 | 0.0939 |
| Heilongjiang | 560 | 122.00 | 52.70 | natural | 8272.2513  | 213961.6056 | 0.0573 |
| Heilongjiang | 600 | 122.40 | 53.00 | natural | 8234.3750  | 219890.6250 | 0.0640 |
| Heilongjiang | 900 | 124.20 | 52.60 | natural | 3752.0000  | 73488.0000  | 0.1250 |
| Heilongjiang | 890 | 126.40 | 50.20 | natural | 10707.7626 | 332968.0365 | 0.0438 |
| Mongolia     | 832 | 121.50 | 50.80 | natural | 7230.0469  | 180375.5869 | 0.0639 |
| Mongolia     | 793 | 120.60 | 52.60 | natural | 6727.4939  | 148503.6496 | 0.0822 |
| Mongolia     | 633 | 120.80 | 52.20 | natural | 11213.5922 | 371504.8544 | 0.0412 |
| Mongolia     | 700 | 121.70 | 50.40 | natural | 7322.8346  | 149685.0394 | 0.0635 |

**Temperate *Pinus tabulaeformis* forest**

|          |      |        |       |         |            |             |        |
|----------|------|--------|-------|---------|------------|-------------|--------|
| An'hui   | 400  | 118.00 | 32.60 | natural | 2369.5150  | 29898.3834  | 0.2165 |
| Sichuan  | 3200 | 103.84 | 33.22 | natural | 5416.6667  | 169226.1905 | 0.0840 |
| Shanxi   | 1670 | 108.50 | 33.33 | natural | 11329.9492 | 175553.2995 | 0.0985 |
| Sichuan  | 3114 | 103.79 | 33.64 | natural | 5151.8987  | 166683.5443 | 0.0790 |
| Shanxi   | 1520 | 107.30 | 34.00 | natural | 16910.2990 | 926079.7342 | 0.0301 |
| Shanxi   | 1589 | 112.12 | 35.43 | natural | 2960.3960  | 32287.1287  | 0.1010 |
| Shanxi   | 1242 | 112.02 | 35.58 | natural | 5736.8421  | 65828.9474  | 0.0760 |
| Shanxi   | 1150 | 112.08 | 35.60 | natural | 5703.8835  | 65497.5728  | 0.0824 |
| Shanxi   | 1180 | 112.10 | 35.68 | natural | 2572.6141  | 27775.9336  | 0.1205 |
| Shanxi   | 990  | 112.22 | 35.72 | natural | 2295.7461  | 24550.9791  | 0.1481 |
| Shanxi   | 1120 | 112.17 | 35.75 | natural | 4359.3750  | 49000.0000  | 0.0640 |
| Shanxi   | 980  | 112.28 | 35.77 | natural | 1910.5691  | 20111.7886  | 0.0984 |
| Shanxi   | 1350 | 113.11 | 35.95 | natural | 10554.2169 | 127698.7952 | 0.0830 |
| Shanxi   | 1300 | 112.06 | 35.98 | natural | 4203.6554  | 47056.1358  | 0.1532 |
| Shanxi   | 1200 | 112.40 | 36.00 | natural | 6099.2908  | 70449.1726  | 0.0423 |
| Shanxi   | 1380 | 111.07 | 36.08 | natural | 7240.2044  | 84752.9813  | 0.0587 |
| Shanxi   | 1100 | 112.29 | 36.17 | natural | 3288.3642  | 36163.5750  | 0.1186 |
| Shanxi   | 1250 | 112.47 | 36.17 | natural | 5815.6912  | 66824.4085  | 0.0803 |
| Shanxi   | 1150 | 112.16 | 36.32 | natural | 2821.2040  | 30601.9766  | 0.1113 |
| Shandong | 1000 | 117.20 | 36.40 | natural | 2122.8070  | 26216.3743  | 0.1710 |
| Shanxi   | 1065 | 112.25 | 36.42 | natural | 6333.7547  | 73312.2630  | 0.0791 |
| Shanxi   | 1332 | 112.47 | 36.42 | natural | 4742.6982  | 53630.0417  | 0.0719 |
| Shanxi   | 1900 | 111.87 | 36.43 | natural | 8424.9471  | 100000.0000 | 0.0946 |
| Shanxi   | 1550 | 111.22 | 36.45 | natural | 2279.2608  | 24380.5613  | 0.1461 |
| Shanxi   | 1440 | 111.36 | 36.45 | natural | 4317.5997  | 23644.3469  | 0.2733 |
| Shanxi   | 1135 | 112.29 | 36.45 | natural | 8325.4344  | 98704.5814  | 0.0633 |
| Shanxi   | 1130 | 112.41 | 36.47 | natural | 5802.9979  | 66723.7687  | 0.0934 |
| Shanxi   | 1210 | 112.43 | 36.48 | natural | 5029.9401  | 57245.5090  | 0.0668 |
| Shanxi   | 1250 | 112.45 | 36.48 | natural | 3119.0476  | 34178.5714  | 0.0840 |
| Shandong | 680  | 118.20 | 36.50 | natural | 2841.2256  | 28941.5042  | 0.2513 |
| Shanxi   | 1153 | 109.40 | 36.50 | natural | 6114.7327  | 153220.3390 | 0.0767 |
| Shanxi   | 1197 | 112.18 | 36.52 | natural | 4498.7775  | 50599.0220  | 0.0818 |

|          |      |        |       |         |            |             |        |
|----------|------|--------|-------|---------|------------|-------------|--------|
| Shanxi   | 1300 | 112.54 | 36.52 | natural | 4663.6086  | 52737.0031  | 0.0654 |
| Shanxi   | 1260 | 112.30 | 36.53 | natural | 4981.3433  | 56604.4776  | 0.1072 |
| Shanxi   | 1345 | 112.43 | 36.53 | natural | 9750.7788  | 117320.8723 | 0.0321 |
| Shanxi   | 1290 | 112.41 | 36.55 | natural | 3397.9475  | 37434.4356  | 0.0877 |
| Shanxi   | 1650 | 111.20 | 36.58 | natural | 5045.2781  | 57328.5899  | 0.1546 |
| Shanxi   | 1450 | 112.10 | 36.58 | natural | 7378.6408  | 86650.4854  | 0.0412 |
| Shanxi   | 1550 | 112.07 | 36.60 | natural | 11253.4060 | 136948.2289 | 0.0367 |
| Shanxi   | 1207 | 112.34 | 36.60 | natural | 2805.5965  | 30441.8262  | 0.1358 |
| Shanxi   | 1580 | 111.22 | 36.63 | natural | 3372.0930  | 37148.1028  | 0.1634 |
| Shanxi   | 1680 | 112.07 | 36.63 | natural | 12334.6304 | 151400.7782 | 0.0514 |
| Shanxi   | 1251 | 112.34 | 36.63 | natural | 2725.2747  | 29571.4286  | 0.0910 |
| Shanxi   | 1800 | 112.10 | 36.65 | natural | 7750.5330  | 91268.6567  | 0.0938 |
| Shanxi   | 1210 | 112.27 | 36.65 | natural | 5094.8509  | 57949.4128  | 0.1107 |
| Shanxi   | 1790 | 112.07 | 36.70 | natural | 9741.0604  | 117065.3514 | 0.0811 |
| Shanxi   | 1804 | 112.12 | 36.70 | natural | 16322.4181 | 205440.8060 | 0.0397 |
| Shandong | 250  | 121.10 | 36.70 | natural | 1027.4554  | 11616.1902  | 0.3533 |
| Shanxi   | 1445 | 112.00 | 36.70 | natural | 1018.1049  | 10581.9422  | 0.8506 |
| Shanxi   | 1352 | 112.23 | 36.73 | natural | 5533.4282  | 63328.5917  | 0.0703 |
| Shanxi   | 1352 | 112.34 | 36.77 | natural | 7926.4556  | 93626.1491  | 0.0979 |
| Shanxi   | 1322 | 112.37 | 36.77 | natural | 2685.8214  | 29088.0700  | 0.1601 |
| Shanxi   | 1810 | 112.12 | 36.78 | natural | 7523.9923  | 88416.5067  | 0.1042 |
| Shanxi   | 1600 | 112.17 | 36.82 | natural | 8676.8150  | 103278.6885 | 0.0854 |
| Shanxi   | 1527 | 112.34 | 36.82 | natural | 6023.3298  | 69501.5907  | 0.0943 |
| Shanxi   | 1421 | 112.41 | 36.83 | natural | 9796.6728  | 117763.4011 | 0.0541 |
| Shanxi   | 1610 | 113.04 | 36.85 | natural | 9748.2838  | 117185.3547 | 0.0874 |
| Shanxi   | 1583 | 112.37 | 36.90 | natural | 3776.6714  | 41941.6785  | 0.1406 |
| Shanxi   | 1470 | 112.41 | 36.90 | natural | 3625.5768  | 40131.8392  | 0.1517 |
| Shanxi   | 1820 | 112.04 | 36.92 | natural | 3722.0259  | 41272.0848  | 0.1698 |
| Shanxi   | 1600 | 112.30 | 36.92 | natural | 2287.2340  | 24445.2888  | 0.1316 |
| Shanxi   | 1680 | 112.39 | 36.92 | natural | 8373.8796  | 99321.3828  | 0.0781 |
| Shanxi   | 1720 | 112.35 | 36.93 | natural | 3769.6850  | 41865.1575  | 0.2032 |
| Shanxi   | 1819 | 112.30 | 36.97 | natural | 4295.1542  | 48193.8326  | 0.1362 |
| Shanxi   | 1781 | 112.35 | 36.97 | natural | 11866.0287 | 145263.1579 | 0.0418 |
| Shanxi   | 1850 | 112.28 | 36.98 | natural | 5546.4160  | 63525.2644  | 0.0851 |
| Shanxi   | 1813 | 112.37 | 36.98 | natural | 4282.5112  | 48082.9596  | 0.0892 |
| Shanxi   | 1820 | 112.30 | 37.00 | natural | 5329.1039  | 60888.1840  | 0.1261 |
| Shanxi   | 1670 | 112.35 | 37.00 | natural | 6726.3427  | 78286.4450  | 0.0782 |
| Shanxi   | 240  | 120.00 | 37.00 | natural | 434.1085   | 4287.5264   | 0.7095 |
| Shanxi   | 1690 | 112.33 | 37.02 | natural | 3673.9380  | 40734.7876  | 0.0871 |
| Shanxi   | 1865 | 112.37 | 37.02 | natural | 5000.0000  | 56725.0674  | 0.0742 |
| Shanxi   | 1630 | 112.42 | 37.02 | natural | 6452.5140  | 74818.4358  | 0.0716 |
| Shanxi   | 1600 | 113.45 | 37.12 | natural | 7606.9731  | 89413.6292  | 0.0631 |
| Shanxi   | 1856 | 113.52 | 37.18 | natural | 7066.4928  | 82620.5997  | 0.0767 |
| Shanxi   | 275  | 121.70 | 37.20 | natural | 1676.2854  | 20687.3033  | 0.3812 |

|        |      |        |       |         |            |             |        |
|--------|------|--------|-------|---------|------------|-------------|--------|
| Shanxi | 1320 | 112.51 | 37.23 | natural | 3127.5510  | 34209.1837  | 0.1960 |
| Shanxi | 1500 | 111.23 | 37.25 | natural | 5551.0480  | 28999.3239  | 0.1479 |
| Shanxi | 1700 | 113.59 | 37.27 | natural | 5639.1876  | 64671.4456  | 0.0837 |
| Shanxi | 1530 | 111.18 | 37.28 | natural | 3906.1851  | 21457.0361  | 0.2409 |
| Shanxi | 1395 | 111.23 | 37.30 | natural | 3489.1254  | 19504.8589  | 0.2161 |
| Shanxi | 1551 | 113.48 | 37.32 | natural | 8205.6075  | 97084.1121  | 0.0535 |
| Shanxi | 1520 | 113.37 | 37.33 | natural | 4207.3171  | 47103.6585  | 0.0984 |
| Shanxi | 1550 | 111.32 | 37.35 | natural | 2581.2712  | 27831.1499  | 0.2061 |
| Shanxi | 1445 | 113.48 | 37.40 | natural | 5965.2174  | 68817.3913  | 0.0575 |
| Shanxi | 1490 | 113.46 | 37.42 | natural | 4160.0000  | 46595.5556  | 0.1125 |
| Shanxi | 1575 | 111.77 | 37.47 | natural | 4214.0791  | 47184.1851  | 0.1037 |
| Shanxi | 1650 | 111.81 | 37.47 | natural | 18158.6402 | 230849.8584 | 0.0353 |
| Shanxi | 1430 | 113.31 | 37.47 | natural | 6504.6296  | 75462.9630  | 0.0864 |
| Shanxi | 1590 | 113.35 | 37.47 | natural | 7332.1555  | 85918.7279  | 0.0566 |
| Shanxi | 1595 | 111.70 | 37.47 | natural | 11334.3328 | 138140.9295 | 0.0667 |
| Shanxi | 1641 | 113.28 | 37.47 | natural | 7674.4186  | 90342.7173  | 0.0817 |
| Shanxi | 1582 | 113.33 | 37.47 | natural | 7574.6714  | 89080.0478  | 0.0837 |
| Shanxi | 1600 | 113.27 | 37.47 | natural | 12557.7558 | 154471.9472 | 0.0606 |
| Shanxi | 1620 | 111.75 | 37.48 | natural | 15987.6543 | 200843.6214 | 0.0486 |
| Shanxi | 1750 | 111.59 | 37.50 | natural | 19372.1973 | 247847.5336 | 0.0223 |
| Shanxi | 1680 | 111.72 | 37.50 | natural | 24346.1538 | 318384.6154 | 0.0260 |
| Shanxi | 1460 | 111.86 | 37.50 | natural | 3869.9690  | 43095.9752  | 0.1292 |
| Shanxi | 1645 | 111.66 | 37.52 | natural | 12308.6124 | 153373.2057 | 0.0836 |
| Shanxi | 1820 | 111.66 | 37.63 | natural | 5954.6539  | 68591.8854  | 0.0838 |
| Shanxi | 1680 | 111.70 | 37.63 | natural | 6064.0920  | 69983.5661  | 0.1217 |
| Shanxi | 1424 | 111.75 | 37.63 | natural | 9957.4468  | 119914.8936 | 0.0940 |
| Shanxi | 1300 | 111.84 | 37.63 | natural | 4439.5410  | 49920.5649  | 0.1133 |
| Shanxi | 1750 | 111.59 | 37.65 | natural | 20162.7486 | 258915.0090 | 0.0553 |
| Shanxi | 1575 | 111.63 | 37.65 | natural | 13325.8929 | 164799.1071 | 0.0448 |
| Shanxi | 1300 | 111.73 | 37.65 | natural | 9347.8261  | 111992.7536 | 0.0552 |
| Shanxi | 1450 | 111.82 | 37.65 | natural | 10726.9155 | 129901.7682 | 0.0509 |
| Shanxi | 1800 | 111.57 | 37.67 | natural | 23361.7021 | 304510.6383 | 0.0235 |
| Shanxi | 1230 | 111.97 | 37.67 | natural | 9801.5123  | 49829.8677  | 0.1058 |
| Shanxi | 1360 | 111.82 | 37.68 | natural | 5132.4965  | 58410.0418  | 0.0717 |
| Shanxi | 1985 | 111.43 | 37.70 | natural | 30202.8986 | 403420.2899 | 0.0345 |
| Shanxi | 1550 | 111.66 | 37.70 | natural | 7307.2061  | 85663.7168  | 0.0791 |
| Shanxi | 1420 | 111.70 | 37.70 | natural | 6209.2624  | 71801.0292  | 0.0583 |
| Shanxi | 1670 | 111.50 | 37.72 | natural | 20983.6066 | 270601.0929 | 0.0549 |
| Shanxi | 1600 | 111.86 | 37.72 | natural | 6884.1545  | 80252.9960  | 0.0751 |
| Shanxi | 1100 | 113.59 | 37.72 | natural | 5360.8247  | 61340.2062  | 0.0485 |
| Shanxi | 1670 | 111.48 | 37.73 | natural | 28904.1096 | 384452.0548 | 0.0146 |
| Shanxi | 1600 | 111.61 | 37.73 | natural | 9215.6863  | 110150.8296 | 0.0663 |
| Shanxi | 1650 | 111.66 | 37.73 | natural | 10698.6900 | 129636.0990 | 0.0687 |
| Shanxi | 1410 | 111.70 | 37.73 | natural | 14181.3602 | 176297.2292 | 0.0397 |



|                                                      |      |        |       |         |            |              |        |
|------------------------------------------------------|------|--------|-------|---------|------------|--------------|--------|
| Shanxi                                               | 1700 | 111.84 | 37.73 | natural | 13904.7619 | 172452.3810  | 0.0420 |
| Shanxi                                               | 1940 | 111.64 | 37.75 | natural | 12289.5126 | 150856.7208  | 0.0677 |
| Shanxi                                               | 1560 | 111.79 | 37.75 | natural | 6922.0246  | 80793.4337   | 0.0731 |
| Shanxi                                               | 1400 | 111.82 | 37.75 | natural | 12773.9726 | 157363.0137  | 0.0292 |
| Shanxi                                               | 1550 | 111.86 | 37.75 | natural | 9792.5311  | 117821.5768  | 0.0482 |
| Shanxi                                               | 1555 | 111.91 | 37.75 | natural | 8956.2764  | 106784.2031  | 0.0709 |
| Shanxi                                               | 1750 | 111.95 | 37.78 | natural | 3548.3871  | 39242.9230   | 0.1519 |
| Shanxi                                               | 1740 | 111.70 | 37.80 | natural | 10049.5050 | 121039.6040  | 0.0404 |
| Shanxi                                               | 1580 | 111.98 | 37.80 | natural | 4424.4984  | 49746.5681   | 0.0947 |
| Shanxi                                               | 1475 | 112.32 | 37.82 | natural | 4863.2580  | 55112.9608   | 0.0841 |
| Shanxi                                               | 1711 | 111.36 | 37.90 | natural | 9048.5830  | 108076.9231  | 0.0494 |
| Shanxi                                               | 1692 | 111.50 | 37.90 | natural | 4583.4716  | 53305.6754   | 0.3013 |
| Shanxi                                               | 1497 | 111.98 | 37.92 | natural | 3431.2878  | 37856.5255   | 0.1157 |
| Shanxi                                               | 1400 | 112.98 | 38.02 | natural | 2475.1656  | 26572.8477   | 0.1208 |
| Shanxi                                               | 1680 | 111.25 | 38.10 | natural | 8628.8089  | 102576.1773  | 0.0722 |
| Shanxi                                               | 1390 | 112.39 | 38.13 | natural | 7815.7895  | 92197.3684   | 0.0760 |
| Shanxi                                               | 1667 | 111.32 | 38.22 | natural | 9244.2882  | 110527.2408  | 0.0569 |
| Shanxi                                               | 1750 | 111.37 | 38.25 | natural | 18637.8738 | 237740.8638  | 0.0301 |
| Shanxi                                               | 1940 | 111.43 | 38.38 | natural | 6020.4082  | 69500.0000   | 0.0980 |
| Shanxi                                               | 1200 | 112.40 | 38.42 | natural | 2828.5256  | 30697.1154   | 0.1248 |
| Shanxi                                               | 1620 | 111.37 | 38.43 | natural | 7366.2967  | 86417.7598   | 0.0991 |
| Shanxi                                               | 1650 | 111.39 | 38.45 | natural | 9437.5000  | 113187.5000  | 0.0800 |
| Shanxi                                               | 1690 | 111.73 | 38.62 | natural | 5982.6947  | 68974.0420   | 0.0809 |
| Shanxi                                               | 1700 | 111.97 | 38.68 | natural | 2807.9393  | 30461.1792   | 0.1713 |
| Shanxi                                               | 1700 | 111.94 | 38.68 | natural | 6523.4375  | 75742.1875   | 0.1024 |
| Beijing                                              | 553  | 116.80 | 40.30 | natural | 7145.7627  | 38271.1864   | 0.1475 |
| Hebei                                                | 350  | 118.90 | 40.40 | natural | 2512.7802  | 19284.3099   | 0.2543 |
| Liaoning                                             | 600  | 123.20 | 40.50 | natural | 7367.6782  | 90063.5145   | 0.1417 |
| Hebei                                                | 1100 | 117.90 | 40.90 | natural | 4970.6458  | 44155.2511   | 0.1533 |
| Hebei                                                | 898  | 118.60 | 41.00 | natural | 8072.4638  | 76376.8116   | 0.1380 |
| Mongolia                                             | 1110 | 119.30 | 41.60 | natural | 2307.4636  | 37600.3568   | 0.3363 |
| Hebei                                                | 1140 | 117.30 | 42.00 | natural | 17281.8312 | 187281.8312  | 0.0699 |
| Mongolia                                             | 843  | 118.97 | 42.27 | natural | 3234.8020  | 64595.6497   | 0.1793 |
| Jilin                                                | 560  | 129.50 | 42.60 | natural | 2479.7268  | 31323.0901   | 0.2343 |
| <b>Temperate mixed coniferous-broadleaved forest</b> |      |        |       |         |            |              |        |
| Heilongjiang                                         | 300  | 127.20 | 50.70 | planted | 1068.6778  | 7984.5956    | 0.6232 |
| Heilongjiang                                         | 400  | 129.70 | 44.70 | natural | 21111.1111 | 897111.1111  | 0.0270 |
| Heilongjiang                                         | 350  | 129.00 | 47.00 | planted | 3200.0000  | 95245.4545   | 0.1100 |
| Heilongjiang                                         | 378  | 131.80 | 46.50 | natural | 14657.9805 | 630651.4658  | 0.0307 |
| Heilongjiang                                         | 264  | 133.50 | 46.30 | natural | 17489.3617 | 892297.8723  | 0.0235 |
| Heilongjiang                                         | 240  | 132.90 | 45.80 | natural | 17150.0000 | 1035500.0000 | 0.0200 |
| Heilongjiang                                         | 450  | 130.18 | 45.18 | planted | 1507.7178  | 11460.8600   | 0.3628 |
| Heilongjiang                                         | 600  | 130.20 | 44.50 | natural | 13775.0000 | 601900.0000  | 0.0400 |
| Heilongjiang                                         | 400  | 128.50 | 44.30 | natural | 9607.2508  | 295045.3172  | 0.0662 |

|                                                       |      |        |       |         |            |             |        |
|-------------------------------------------------------|------|--------|-------|---------|------------|-------------|--------|
| Heilongjiang                                          | 514  | 129.40 | 44.30 | natural | 16306.3063 | 558828.8288 | 0.0444 |
| Heilongjiang                                          | 300  | 127.50 | 45.20 | planted | 3105.7764  | 30082.5206  | 0.2666 |
| Heilongjiang                                          | 403  | 129.30 | 48.10 | natural | 11140.0000 | 474060.0000 | 0.0500 |
| Jilin                                                 | 650  | 128.20 | 42.42 | natural | 6433.7568  | 247994.5554 | 0.1102 |
| Jilin                                                 | 770  | 128.33 | 42.50 | natural | 10434.7826 | 606750.5721 | 0.0437 |
| Jilin                                                 | 250  | 125.30 | 43.90 | planted | 7519.8588  | 90406.0018  | 0.1133 |
| Jilin                                                 | 400  | 125.42 | 42.52 | planted | 2572.3906  | 26632.9966  | 0.2970 |
| Jilin                                                 | 696  | 128.20 | 43.30 | natural | 13950.3386 | 587878.1038 | 0.0443 |
| Jilin                                                 | 600  | 127.20 | 42.30 | natural | 6728.0453  | 258286.1190 | 0.0706 |
| Jilin                                                 | 300  | 127.00 | 41.90 | planted | 4408.4507  | 46136.1502  | 0.2130 |
| Jilin                                                 | 675  | 128.10 | 42.40 | natural | 8806.6826  | 279653.9379 | 0.0838 |
| Liaoning                                              | 233  | 123.90 | 40.88 | planted | 13076.9231 | 150809.1908 | 0.1001 |
| Liaoning                                              | 500  | 125.30 | 41.60 | planted | 2143.7126  | 18158.6826  | 0.3340 |
| <b>Temperate typical deciduous broadleaved forest</b> |      |        |       |         |            |             |        |
| Beijing                                               | 1365 | 115.43 | 39.97 | natural | 7386.0705  | 96173.6887  | 0.1163 |
| Guizhou                                               | 540  | 108.12 | 28.25 | natural | 3377.2652  | 65271.8287  | 0.1214 |
| Hebei                                                 | 1300 | 117.90 | 40.90 | natural | 685.7143   | 21184.4156  | 0.3850 |
| Hebei                                                 | 1200 | 118.40 | 40.60 | natural | 1052.8097  | 35829.3839  | 0.2954 |
| Hebei                                                 | 1150 | 118.60 | 41.00 | natural | 1609.4822  | 51915.1591  | 0.1603 |
| Hebei                                                 | 1100 | 118.70 | 40.50 | natural | 381.9361   | 12511.4100  | 0.8326 |
| Hebei                                                 | 1005 | 117.40 | 40.60 | natural | 1717.6634  | 81293.4631  | 0.1438 |
| Heilongjiang                                          | 293  | 130.50 | 45.70 | natural | 1021.6718  | 31037.1517  | 0.2584 |
| Heilongjiang                                          | 350  | 126.60 | 51.70 | natural | 8480.3922  | 204803.9216 | 0.0408 |
| Heilongjiang                                          | 177  | 133.50 | 46.30 | natural | 5039.3013  | 146899.5633 | 0.1145 |
| Heilongjiang                                          | 190  | 132.90 | 45.80 | natural | 4128.7284  | 166656.2009 | 0.0637 |
| Heilongjiang                                          | 218  | 134.00 | 46.80 | natural | 9689.7375  | 325489.2601 | 0.0419 |
| Heilongjiang                                          | 492  | 127.50 | 45.20 | natural | 4746.5438  | 111990.7834 | 0.1085 |
| Heilongjiang                                          | 400  | 127.60 | 45.43 | natural | 3566.6667  | 127475.0000 | 0.1200 |
| Heilongjiang                                          | 500  | 128.20 | 45.00 | natural | 6745.3416  | 165838.5093 | 0.0805 |
| Heilongjiang                                          | 383  | 127.60 | 44.90 | natural | 3397.3866  | 108047.6556 | 0.1301 |
| Heilongjiang                                          | 500  | 131.80 | 46.50 | natural | 5008.0000  | 146960.0000 | 0.0625 |
| Heilongjiang                                          | 240  | 130.70 | 47.00 | natural | 10715.6309 | 247476.4595 | 0.0531 |
| Jilin                                                 | 550  | 128.10 | 42.40 | natural | 7755.6818  | 560568.1818 | 0.0352 |
| Jilin                                                 | 800  | 127.50 | 40.70 | natural | 13456.5217 | 520000.0000 | 0.0460 |
| Jilin                                                 | 650  | 128.20 | 43.30 | natural | 30353.9823 | 863716.8142 | 0.0226 |
| Jilin                                                 | 615  | 129.00 | 42.50 | natural | 2216.2577  | 67346.6258  | 0.1304 |
| Jilin                                                 | 700  | 126.90 | 41.80 | natural | 7068.4039  | 517035.8306 | 0.0307 |
| Jilin                                                 | 650  | 130.20 | 44.50 | natural | 8400.8097  | 223117.4089 | 0.0494 |
| Jilin                                                 | 450  | 129.70 | 43.30 | natural | 10447.2272 | 311788.9088 | 0.0559 |
| Jilin                                                 | 450  | 129.70 | 43.30 | natural | 1325.4237  | 41010.1695  | 0.2950 |
| Jilin                                                 | 450  | 129.50 | 42.60 | natural | 427.2743   | 13345.2021  | 0.5617 |
| Jilin                                                 | 450  | 126.70 | 43.50 | natural | 750.0000   | 23950.0000  | 0.3200 |
| Jilin                                                 | 450  | 126.70 | 43.50 | natural | 489.0720   | 12581.5120  | 0.5582 |
| Jilin                                                 | 460  | 126.70 | 42.90 | natural | 2389.3333  | 78533.3333  | 0.1875 |

|          |      |        |       |         |            |             |        |
|----------|------|--------|-------|---------|------------|-------------|--------|
| Liaoning | 350  | 125.00 | 41.70 | natural | 7712.8548  | 252136.8948 | 0.0599 |
| Liaoning | 400  | 124.70 | 40.70 | natural | 753.1447   | 13402.5157  | 0.6360 |
| Liaoning | 350  | 121.70 | 42.00 | natural | 1333.3333  | 56413.0435  | 0.1380 |
| Mongolia | 498  | 124.00 | 50.40 | natural | 4923.9544  | 133840.3042 | 0.0526 |
| Ningxia  | 2050 | 106.27 | 35.60 | natural | 3385.0000  | 48825.0000  | 0.2000 |
| Shandong | 400  | 117.90 | 35.70 | natural | 6612.1495  | 131425.2336 | 0.0428 |
| Shandong | 700  | 117.20 | 36.40 | natural | 2701.0309  | 47505.1546  | 0.1455 |
| Shanxi   | 1250 | 111.41 | 34.97 | natural | 9260.2740  | 130986.3014 | 0.0730 |
| Shanxi   | 1100 | 111.42 | 34.98 | natural | 2605.2819  | 48336.9022  | 0.1401 |
| Shanxi   | 936  | 111.55 | 35.03 | natural | 5401.1461  | 65279.3696  | 0.1396 |
| Shanxi   | 830  | 111.66 | 35.13 | natural | 2164.2764  | 33168.1877  | 0.1534 |
| Shanxi   | 1100 | 111.57 | 35.15 | natural | 5842.0441  | 116573.7515 | 0.0861 |
| Shanxi   | 1050 | 111.57 | 35.20 | natural | 4833.3333  | 65755.5556  | 0.0900 |
| Shanxi   | 1490 | 112.32 | 35.23 | natural | 4147.8439  | 53855.2361  | 0.1948 |
| Shanxi   | 1350 | 112.30 | 35.25 | natural | 8384.7981  | 106389.5487 | 0.0421 |
| Shanxi   | 1500 | 112.45 | 35.27 | natural | 10745.5013 | 135681.2339 | 0.0389 |
| Shanxi   | 800  | 111.79 | 35.30 | natural | 2057.5080  | 31015.9744  | 0.1565 |
| Shanxi   | 1422 | 112.19 | 35.30 | natural | 6511.2406  | 125753.5387 | 0.1201 |
| Shanxi   | 850  | 111.99 | 35.32 | natural | 2815.6863  | 51725.4902  | 0.1275 |
| Shanxi   | 1180 | 111.44 | 35.33 | natural | 6824.3243  | 88952.7027  | 0.1184 |
| Shanxi   | 1200 | 111.99 | 35.35 | natural | 1439.2523  | 24747.6636  | 0.2140 |
| Shanxi   | 1220 | 111.79 | 35.37 | natural | 6934.8010  | 88518.2049  | 0.1181 |
| Shanxi   | 1380 | 111.68 | 35.38 | natural | 3947.9167  | 74713.5417  | 0.1920 |
| Shanxi   | 1675 | 112.01 | 35.40 | natural | 7826.8551  | 155918.7279 | 0.0566 |
| Shanxi   | 1500 | 111.79 | 35.45 | natural | 7075.9717  | 88533.5689  | 0.1132 |
| Shanxi   | 1214 | 112.08 | 35.47 | natural | 3276.6338  | 62345.5685  | 0.1117 |
| Shanxi   | 1300 | 111.84 | 35.48 | natural | 7245.6576  | 147220.8437 | 0.0403 |
| Shanxi   | 1280 | 113.16 | 35.52 | natural | 1215.2466  | 20448.4305  | 0.2230 |
| Shanxi   | 1280 | 113.29 | 35.52 | natural | 9115.6463  | 113551.0204 | 0.0735 |
| Shanxi   | 1500 | 111.84 | 35.55 | natural | 1431.8574  | 24197.8148  | 0.1739 |
| Shanxi   | 1250 | 112.15 | 35.63 | natural | 9871.1340  | 122525.7732 | 0.0776 |
| Shanxi   | 1300 | 112.15 | 35.67 | natural | 4034.9345  | 54681.2227  | 0.1145 |
| Shanxi   | 1385 | 113.52 | 35.67 | natural | 6329.9663  | 89006.7340  | 0.0594 |
| Shanxi   | 1400 | 112.04 | 35.72 | natural | 3479.6574  | 47071.7345  | 0.1868 |
| Shanxi   | 1500 | 110.98 | 35.82 | natural | 7862.9032  | 99677.4194  | 0.0496 |
| Shanxi   | 1247 | 110.00 | 35.97 | natural | 2556.7239  | 44786.9397  | 0.1807 |
| Shanxi   | 1440 | 110.96 | 36.10 | natural | 7372.2045  | 88107.0288  | 0.1252 |
| Shanxi   | 1300 | 111.07 | 36.12 | natural | 6982.9060  | 87786.3248  | 0.1170 |
| Shanxi   | 1630 | 110.91 | 36.13 | natural | 3410.8527  | 46887.2987  | 0.1677 |
| Shanxi   | 1490 | 111.02 | 36.15 | natural | 11349.8099 | 141730.0380 | 0.0526 |
| Shanxi   | 1620 | 111.04 | 36.17 | natural | 7453.3107  | 97249.5756  | 0.0589 |
| Shanxi   | 1510 | 110.64 | 36.27 | natural | 4100.9682  | 57655.6017  | 0.1446 |
| Shanxi   | 1410 | 110.96 | 36.27 | natural | 13376.2887 | 162345.3608 | 0.0388 |
| Shanxi   | 1270 | 111.67 | 36.30 | natural | 5094.9367  | 65759.4937  | 0.0632 |

|        |      |        |       |         |            |             |        |
|--------|------|--------|-------|---------|------------|-------------|--------|
| Shanxi | 1400 | 111.29 | 36.33 | natural | 3681.0631  | 47222.5914  | 0.1505 |
| Shanxi | 1450 | 111.87 | 36.37 | natural | 3619.4416  | 49369.1830  | 0.1934 |
| Shanxi | 1400 | 110.60 | 36.38 | natural | 3796.3945  | 75026.5111  | 0.0943 |
| Shanxi | 1900 | 111.29 | 36.42 | natural | 15553.3981 | 189320.3883 | 0.0515 |
| Shanxi | 1281 | 111.94 | 36.42 | natural | 10272.7273 | 126181.8182 | 0.0660 |
| Shanxi | 1015 | 111.94 | 36.45 | natural | 24389.5349 | 295290.6977 | 0.0344 |
| Shanxi | 1450 | 111.91 | 36.47 | natural | 7557.7558  | 97227.7228  | 0.0909 |
| Shanxi | 1633 | 111.85 | 36.48 | natural | 8896.7136  | 172370.8920 | 0.0426 |
| Shanxi | 1350 | 111.94 | 36.48 | natural | 5088.2353  | 67156.8627  | 0.1020 |
| Shanxi | 1500 | 111.92 | 36.52 | natural | 2602.2305  | 37486.9888  | 0.1345 |
| Shanxi | 1380 | 112.00 | 36.52 | natural | 1979.3564  | 29987.8567  | 0.1647 |
| Shanxi | 1400 | 111.92 | 36.55 | natural | 4800.2160  | 61177.1058  | 0.1852 |
| Shanxi | 1490 | 111.96 | 36.55 | natural | 3150.6849  | 43822.5701  | 0.1533 |
| Shanxi | 1460 | 111.94 | 36.57 | natural | 6291.6667  | 81486.1111  | 0.0720 |
| Shanxi | 1580 | 111.22 | 36.60 | natural | 3348.5454  | 63456.9310  | 0.1753 |
| Shanxi | 1450 | 111.94 | 36.60 | natural | 2627.3585  | 48995.2830  | 0.2120 |
| Shanxi | 1630 | 112.01 | 36.62 | natural | 7420.5268  | 96158.0381  | 0.1101 |
| Shanxi | 1670 | 113.33 | 36.63 | natural | 1955.1438  | 33866.4066  | 0.2051 |
| Shanxi | 1930 | 111.92 | 36.65 | natural | 14116.6937 | 177277.1475 | 0.0617 |
| Shanxi | 1650 | 111.27 | 36.67 | natural | 4033.7838  | 53013.5135  | 0.1480 |
| Shanxi | 1650 | 111.94 | 36.67 | natural | 6634.6922  | 84700.2398  | 0.1251 |
| Shanxi | 1770 | 112.07 | 36.67 | natural | 4299.9336  | 58652.9529  | 0.1507 |
| Shanxi | 1760 | 112.07 | 36.67 | natural | 10486.7257 | 130383.4808 | 0.0678 |
| Shanxi | 1700 | 112.10 | 36.68 | natural | 6172.5293  | 81088.7772  | 0.1194 |
| Shanxi | 1630 | 113.30 | 36.68 | natural | 6520.1123  | 85724.9766  | 0.1069 |
| Shanxi | 1740 | 113.28 | 36.70 | natural | 4924.6231  | 96231.1558  | 0.0796 |
| Shanxi | 1630 | 111.18 | 36.70 | natural | 14650.7666 | 183117.5468 | 0.0587 |
| Shanxi | 1290 | 111.29 | 36.73 | natural | 3198.6242  | 42381.7713  | 0.1163 |
| Shanxi | 1761 | 112.10 | 36.73 | natural | 14023.2558 | 173255.8140 | 0.0430 |
| Shanxi | 1699 | 111.99 | 36.75 | natural | 8049.0196  | 102117.6471 | 0.1020 |
| Shanxi | 1579 | 112.48 | 36.75 | natural | 12247.9339 | 151421.4876 | 0.0605 |
| Shanxi | 1650 | 111.20 | 36.77 | natural | 8620.2186  | 110450.8197 | 0.0732 |
| Shanxi | 2011 | 111.96 | 36.77 | natural | 3909.0445  | 52682.6776  | 0.1957 |
| Shanxi | 1811 | 112.05 | 36.77 | natural | 7012.1951  | 88609.7561  | 0.0820 |
| Shanxi | 1608 | 112.14 | 36.77 | natural | 4544.9735  | 60185.1852  | 0.1890 |
| Shanxi | 1605 | 112.17 | 36.78 | natural | 5852.3985  | 76553.5055  | 0.1355 |
| Shanxi | 1550 | 111.20 | 36.80 | natural | 23396.8254 | 291396.8254 | 0.0315 |
| Shanxi | 1703 | 111.92 | 36.80 | natural | 9362.2142  | 118555.9567 | 0.0831 |
| Shanxi | 1640 | 113.33 | 36.82 | natural | 8707.8652  | 112865.1685 | 0.0534 |
| Shanxi | 1470 | 111.20 | 36.83 | natural | 7807.6923  | 101833.3333 | 0.0780 |
| Shanxi | 1540 | 113.35 | 36.85 | natural | 6068.5484  | 123447.5806 | 0.0496 |
| Shanxi | 1200 | 110.71 | 36.87 | natural | 1483.1349  | 26408.7302  | 0.2016 |
| Shanxi | 1640 | 111.11 | 36.90 | natural | 5415.9445  | 71819.7574  | 0.1154 |
| Shanxi | 1750 | 111.99 | 36.90 | natural | 3881.5789  | 52286.1842  | 0.1216 |

|        |      |        |       |         |            |             |        |
|--------|------|--------|-------|---------|------------|-------------|--------|
| Shanxi | 2150 | 112.08 | 36.97 | natural | 7968.0000  | 102544.0000 | 0.0625 |
| Shanxi | 1555 | 111.11 | 37.03 | natural | 10620.6897 | 129448.2759 | 0.0870 |
| Shanxi | 1690 | 111.11 | 37.05 | natural | 5847.0336  | 77090.7791  | 0.1399 |
| Shanxi | 1150 | 111.29 | 37.05 | natural | 5369.4581  | 66472.9064  | 0.1015 |
| Shanxi | 1556 | 113.50 | 37.05 | natural | 13243.2432 | 165210.2102 | 0.0666 |
| Shanxi | 1430 | 111.31 | 37.07 | natural | 7314.8148  | 95532.4074  | 0.0864 |
| Shanxi | 1820 | 111.11 | 37.12 | natural | 7717.2875  | 98892.0726  | 0.1047 |
| Shanxi | 1750 | 111.20 | 37.12 | natural | 3535.9526  | 48287.6205  | 0.1349 |
| Shanxi | 1340 | 111.38 | 37.12 | natural | 5379.6095  | 68459.8698  | 0.0922 |
| Shanxi | 1482 | 111.38 | 37.20 | natural | 12125.8503 | 148605.4422 | 0.0588 |
| Shanxi | 1520 | 111.38 | 37.30 | natural | 3097.5610  | 41699.1870  | 0.1230 |
| Shanxi | 1780 | 111.38 | 37.37 | natural | 6806.3872  | 87704.5908  | 0.1002 |
| Shanxi | 1840 | 111.34 | 37.40 | natural | 17590.3614 | 217108.4337 | 0.0166 |
| Shanxi | 1500 | 113.35 | 37.43 | natural | 3711.3402  | 49436.9548  | 0.1261 |
| Shanxi | 1690 | 111.72 | 37.47 | natural | 3191.9092  | 44849.5313  | 0.2027 |
| Shanxi | 1620 | 111.75 | 37.47 | natural | 3333.3333  | 46886.5122  | 0.1683 |
| Shanxi | 1712 | 111.43 | 37.48 | natural | 3128.4530  | 44730.6630  | 0.1448 |
| Shanxi | 1620 | 111.79 | 37.48 | natural | 3458.1712  | 46687.7432  | 0.2056 |
| Shanxi | 1490 | 111.84 | 37.48 | natural | 5492.6387  | 72763.3069  | 0.0883 |
| Shanxi | 1550 | 111.90 | 37.48 | natural | 2581.7676  | 46666.6667  | 0.1437 |
| Shanxi | 1575 | 113.35 | 37.50 | natural | 4047.4244  | 53589.5339  | 0.1223 |
| Shanxi | 1484 | 111.79 | 37.52 | natural | 3724.2128  | 71824.1042  | 0.0921 |
| Shanxi | 1420 | 111.88 | 37.52 | natural | 3537.0370  | 47268.5185  | 0.1080 |
| Shanxi | 1670 | 111.68 | 37.57 | natural | 7328.9597  | 92380.5061  | 0.1067 |
| Shanxi | 1452 | 111.70 | 37.58 | natural | 8548.1240  | 106623.1648 | 0.0613 |
| Shanxi | 1650 | 111.88 | 37.63 | natural | 4649.3131  | 59826.4642  | 0.1383 |
| Shanxi | 1810 | 111.45 | 37.67 | natural | 7823.0088  | 103150.4425 | 0.0565 |
| Shanxi | 1500 | 111.88 | 37.67 | natural | 8967.0330  | 111626.3736 | 0.0455 |
| Shanxi | 1022 | 111.48 | 37.70 | natural | 11380.2817 | 143873.2394 | 0.0710 |
| Shanxi | 1691 | 111.84 | 37.70 | natural | 5234.3059  | 67621.5738  | 0.1131 |
| Shanxi | 1630 | 111.66 | 37.77 | natural | 4862.8258  | 63237.3114  | 0.1458 |
| Shanxi | 2020 | 111.75 | 37.77 | natural | 7724.6496  | 96438.5820  | 0.1213 |
| Shanxi | 1900 | 111.84 | 37.77 | natural | 4774.7748  | 63186.9369  | 0.1776 |
| Shanxi | 1880 | 111.91 | 37.78 | natural | 3599.4707  | 48989.8544  | 0.2267 |
| Shanxi | 1621 | 111.32 | 37.90 | natural | 3767.6349  | 50141.0788  | 0.1205 |
| Shanxi | 2120 | 111.48 | 38.07 | natural | 7296.5116  | 96744.1860  | 0.0688 |
| Shanxi | 1630 | 112.30 | 38.10 | natural | 4923.4694  | 61658.1633  | 0.0784 |
| Shanxi | 1410 | 112.41 | 38.12 | natural | 2869.5234  | 39817.0438  | 0.2077 |
| Shanxi | 1710 | 111.32 | 38.18 | natural | 11163.9344 | 145737.7049 | 0.0610 |
| Shanxi | 1990 | 111.34 | 38.20 | natural | 2584.0038  | 37737.8135  | 0.2113 |
| Shanxi | 2117 | 112.06 | 38.80 | natural | 2911.3067  | 37772.5118  | 0.1477 |
| Shanxi | 1785 | 111.10 | 37.50 | natural | 10179.1045 | 188611.9403 | 0.0670 |
| Shanxi | 1810 | 112.30 | 36.50 | natural | 6519.6078  | 119566.9935 | 0.1224 |
| Shanxi | 1400 | 112.00 | 36.70 | natural | 3397.8495  | 54822.5806  | 0.1860 |

|                                                                      |      |        |       |         |            |             |        |
|----------------------------------------------------------------------|------|--------|-------|---------|------------|-------------|--------|
| Shanxi                                                               | 1400 | 112.00 | 36.70 | natural | 6737.2881  | 138771.1864 | 0.0472 |
| Sichuan                                                              | 2160 | 104.20 | 33.20 | natural | 8093.3333  | 157266.6667 | 0.0750 |
| Sichuan                                                              | 2600 | 103.00 | 32.60 | natural | 9918.5889  | 198561.7368 | 0.0737 |
| <b>Temperate/subtropical montane Populus-Betula deciduous forest</b> |      |        |       |         |            |             |        |
| Beijing                                                              | 1500 | 115.60 | 39.80 | natural | 863.2479   | 20555.5556  | 0.2340 |
| Beijing                                                              | 1492 | 115.43 | 39.97 | natural | 4539.5349  | 78576.7442  | 0.1075 |
| Guizhou                                                              | 680  | 107.85 | 27.78 | natural | 3913.7380  | 105031.9489 | 0.0626 |
| Guizhou                                                              | 1800 | 105.90 | 26.70 | natural | 5871.6981  | 141426.4151 | 0.1325 |
| Guizhou                                                              | 748  | 108.09 | 25.75 | natural | 9530.3867  | 304654.6961 | 0.0724 |
| Hebei                                                                | 1170 | 117.90 | 40.90 | natural | 2203.8981  | 54722.6387  | 0.2001 |
| Hebei                                                                | 1600 | 115.20 | 40.90 | natural | 3729.4686  | 108753.6232 | 0.1035 |
| Hebei                                                                | 1300 | 116.30 | 41.20 | natural | 1514.7059  | 39936.2745  | 0.2040 |
| Hebei                                                                | 1400 | 118.40 | 40.60 | natural | 4807.0175  | 144128.6550 | 0.0855 |
| Hebei                                                                | 1260 | 117.20 | 41.60 | natural | 2038.4615  | 55493.5897  | 0.1560 |
| Hebei                                                                | 1600 | 117.60 | 41.90 | natural | 3049.1803  | 86743.1694  | 0.0915 |
| Hebei                                                                | 1600 | 117.30 | 42.00 | natural | 1443.0894  | 37808.9431  | 0.2460 |
| Heilongjiang                                                         | 350  | 130.50 | 45.70 | natural | 9633.2046  | 310772.2008 | 0.0518 |
| Heilongjiang                                                         | 450  | 129.70 | 44.70 | natural | 7685.0095  | 253624.2884 | 0.0527 |
| Heilongjiang                                                         | 400  | 128.40 | 44.30 | natural | 11141.4392 | 360967.7419 | 0.0403 |
| Heilongjiang                                                         | 261  | 126.60 | 51.70 | natural | 1579.9373  | 41724.1379  | 0.1595 |
| Heilongjiang                                                         | 507  | 126.60 | 51.70 | natural | 3976.5458  | 119275.0533 | 0.0938 |
| Heilongjiang                                                         | 400  | 124.70 | 52.00 | natural | 7270.9552  | 179210.5263 | 0.1026 |
| Heilongjiang                                                         | 226  | 133.50 | 46.30 | natural | 12474.0484 | 260882.3529 | 0.0578 |
| Heilongjiang                                                         | 880  | 130.20 | 46.30 | natural | 7429.6675  | 226445.0128 | 0.0782 |
| Heilongjiang                                                         | 800  | 130.20 | 44.50 | natural | 14728.2609 | 484402.1739 | 0.0184 |
| Heilongjiang                                                         | 650  | 129.20 | 43.80 | natural | 6087.5000  | 160775.0000 | 0.0800 |
| Heilongjiang                                                         | 170  | 134.00 | 46.80 | natural | 34763.7795 | 612874.0157 | 0.0254 |
| Heilongjiang                                                         | 450  | 128.20 | 45.00 | natural | 4823.6092  | 95820.8955  | 0.1474 |
| Heilongjiang                                                         | 455  | 127.55 | 45.32 | natural | 1710.6549  | 82815.2493  | 0.2046 |
| Heilongjiang                                                         | 500  | 124.50 | 52.50 | natural | 9040.0000  | 147260.0000 | 0.0500 |
| Heilongjiang                                                         | 533  | 127.60 | 44.90 | natural | 8437.5000  | 197731.4815 | 0.0864 |
| Heilongjiang                                                         | 700  | 128.40 | 49.50 | natural | 6944.0459  | 211032.9986 | 0.0697 |
| Heilongjiang                                                         | 600  | 129.00 | 47.00 | natural | 17954.5455 | 393333.3333 | 0.0396 |
| Heilongjiang                                                         | 400  | 131.80 | 46.50 | natural | 12063.8821 | 333882.0639 | 0.0407 |
| Jilin                                                                | 600  | 128.27 | 42.75 | natural | 1988.0716  | 29973.4924  | 0.3018 |
| Jilin                                                                | 590  | 128.10 | 42.40 | natural | 3614.8848  | 86284.7017  | 0.1693 |
| Jilin                                                                | 845  | 126.90 | 41.80 | natural | 12997.2376 | 284558.0110 | 0.0724 |
| Jilin                                                                | 817  | 128.10 | 43.50 | natural | 993.5484   | 19022.2222  | 0.6975 |
| Jilin                                                                | 650  | 128.80 | 42.40 | natural | 2759.4937  | 60898.7342  | 0.3160 |
| Jilin                                                                | 550  | 126.40 | 41.90 | natural | 4106.7961  | 82718.4466  | 0.1030 |
| Jilin                                                                | 600  | 125.70 | 42.20 | natural | 5413.7931  | 112413.7931 | 0.1450 |
| Jilin                                                                | 550  | 126.90 | 44.40 | natural | 13138.1381 | 292897.8979 | 0.0666 |
| Jilin                                                                | 590  | 127.20 | 44.00 | natural | 2388.4157  | 51649.0630  | 0.2935 |
| Jilin                                                                | 650  | 129.70 | 43.30 | natural | 5972.6688  | 147652.7331 | 0.1244 |

|          |      |        |       |         |            |             |        |
|----------|------|--------|-------|---------|------------|-------------|--------|
| Jilin    | 800  | 129.20 | 43.30 | natural | 7394.0021  | 182368.1489 | 0.0967 |
| Jilin    | 700  | 129.40 | 42.70 | natural | 12692.3077 | 238447.8022 | 0.0728 |
| Jilin    | 847  | 129.50 | 42.60 | natural | 2633.4647  | 63321.3902  | 0.2791 |
| Jilin    | 650  | 126.70 | 43.50 | natural | 1448.5981  | 31310.8706  | 0.4066 |
| Jilin    | 684  | 127.10 | 42.90 | natural | 7241.0546  | 174943.5028 | 0.1062 |
| Liaoning | 500  | 119.40 | 42.00 | natural | 4959.2476  | 105962.3824 | 0.1595 |
| Mongolia | 712  | 121.50 | 50.80 | natural | 4112.5828  | 91403.9735  | 0.1510 |
| Mongolia | 1750 | 119.00 | 42.30 | natural | 273.2240   | 14153.0055  | 0.7320 |
| Mongolia | 1434 | 119.30 | 41.60 | natural | 2152.4202  | 52615.8599  | 0.2913 |
| Mongolia | 150  | 122.00 | 49.50 | natural | 9395.8076  | 236806.4118 | 0.0811 |
| Mongolia | 677  | 124.00 | 50.40 | natural | 3080.8081  | 91893.9394  | 0.1188 |
| Mongolia | 800  | 126.60 | 51.70 | natural | 9081.8859  | 300049.6278 | 0.0403 |
| Mongolia | 800  | 109.40 | 40.70 | natural | 1454.7591  | 30495.8872  | 0.4255 |
| Mongolia | 600  | 122.10 | 48.50 | natural | 3968.1668  | 115060.3732 | 0.1822 |
| Ningxia  | 2125 | 106.27 | 35.60 | natural | 1385.0000  | 35035.0000  | 0.2000 |
| Qinghai  | 2650 | 101.80 | 37.00 | natural | 3388.6085  | 23594.0880  | 0.2774 |
| Shanxi   | 1838 | 111.98 | 35.43 | natural | 2589.5876  | 48519.2698  | 0.1479 |
| Shanxi   | 1675 | 111.99 | 35.47 | natural | 4034.2679  | 79018.6916  | 0.0642 |
| Shanxi   | 1590 | 111.02 | 36.18 | natural | 782.4989   | 19225.9150  | 0.2377 |
| Shanxi   | 1700 | 111.00 | 36.27 | natural | 2020.4082  | 54989.7959  | 0.0980 |
| Shanxi   | 1420 | 111.89 | 36.53 | natural | 7826.0870  | 248586.9565 | 0.0460 |
| Shanxi   | 1980 | 112.05 | 36.65 | natural | 2661.4699  | 74665.9243  | 0.0898 |
| Shanxi   | 1480 | 113.30 | 36.65 | natural | 3329.6582  | 61835.7222  | 0.1814 |
| Shanxi   | 1900 | 112.05 | 36.80 | natural | 1525.2153  | 40184.5018  | 0.1626 |
| Shanxi   | 2210 | 112.03 | 36.86 | natural | 4892.9664  | 148226.2997 | 0.0654 |
| Shanxi   | 1550 | 113.36 | 36.87 | natural | 2461.9517  | 81996.4190  | 0.1117 |
| Shanxi   | 1750 | 112.08 | 36.97 | natural | 3183.7607  | 98824.7863  | 0.0936 |
| Shanxi   | 1910 | 111.23 | 37.08 | natural | 1725.6011  | 46315.4173  | 0.1414 |
| Shanxi   | 1845 | 113.50 | 37.12 | natural | 2008.0591  | 66783.0759  | 0.1489 |
| Shanxi   | 2000 | 113.55 | 37.20 | natural | 2385.5165  | 66240.6816  | 0.0939 |
| Shanxi   | 1680 | 111.14 | 37.22 | natural | 5434.1737  | 164789.9160 | 0.0357 |
| Shanxi   | 1659 | 111.41 | 37.42 | natural | 2887.5380  | 96068.8956  | 0.0987 |
| Shanxi   | 1880 | 111.57 | 37.48 | natural | 2936.5854  | 99453.6585  | 0.1025 |
| Shanxi   | 1810 | 111.68 | 37.48 | natural | 5856.7775  | 211163.6829 | 0.0782 |
| Shanxi   | 1772 | 111.57 | 37.52 | natural | 1234.8574  | 46889.4099  | 0.2559 |
| Shanxi   | 1750 | 111.66 | 37.55 | natural | 4259.8870  | 121841.8079 | 0.0885 |
| Shanxi   | 1925 | 111.63 | 37.57 | natural | 2439.8625  | 67617.4112  | 0.0873 |
| Shanxi   | 1550 | 111.39 | 37.67 | natural | 2063.1720  | 80026.8817  | 0.1488 |
| Shanxi   | 2230 | 111.52 | 37.67 | natural | 3648.3740  | 105975.6098 | 0.0984 |
| Shanxi   | 1805 | 111.86 | 37.68 | natural | 3194.6755  | 91198.0033  | 0.0601 |
| Shanxi   | 1447 | 111.52 | 37.70 | natural | 3425.4992  | 98955.4531  | 0.0651 |
| Shanxi   | 2100 | 111.45 | 37.72 | natural | 6298.5075  | 194835.8209 | 0.0335 |
| Shanxi   | 1952 | 111.45 | 37.75 | natural | 5649.8674  | 172068.9655 | 0.0377 |
| Shanxi   | 1965 | 111.57 | 37.75 | natural | 4782.6087  | 146585.3659 | 0.0943 |

|         |      |        |       |         |            |             |        |
|---------|------|--------|-------|---------|------------|-------------|--------|
| Shanxi  | 1798 | 111.48 | 37.77 | natural | 1939.2917  | 71039.9101  | 0.1779 |
| Shanxi  | 2050 | 111.59 | 37.78 | natural | 5484.8967  | 167011.1288 | 0.0629 |
| Shanxi  | 1810 | 111.39 | 37.85 | natural | 2632.5247  | 88095.2381  | 0.1113 |
| Shanxi  | 1850 | 111.36 | 37.93 | natural | 4643.7346  | 157248.1572 | 0.0814 |
| Shanxi  | 2000 | 111.57 | 37.93 | natural | 4496.5278  | 133975.6944 | 0.0576 |
| Shanxi  | 1947 | 111.59 | 37.93 | natural | 2648.8352  | 74219.1544  | 0.1159 |
| Shanxi  | 1799 | 111.55 | 37.97 | natural | 1823.1047  | 48916.9675  | 0.1108 |
| Shanxi  | 1680 | 111.43 | 37.98 | natural | 1449.8807  | 42440.3341  | 0.1676 |
| Shanxi  | 1780 | 111.32 | 38.08 | natural | 5114.2132  | 152043.1472 | 0.0788 |
| Shanxi  | 1751 | 111.32 | 38.25 | natural | 5384.6154  | 163333.3333 | 0.0585 |
| Shanxi  | 2078 | 111.43 | 38.32 | natural | 4612.5461  | 137546.1255 | 0.0542 |
| Shanxi  | 1990 | 111.39 | 38.35 | natural | 4215.2466  | 124633.7818 | 0.0669 |
| Shanxi  | 1888 | 111.43 | 38.35 | natural | 3315.2502  | 95376.7330  | 0.1659 |
| Shanxi  | 1580 | 111.37 | 38.47 | natural | 2205.8824  | 71078.4314  | 0.1224 |
| Shanxi  | 1970 | 111.62 | 38.52 | natural | 2313.9881  | 63861.6071  | 0.1344 |
| Shanxi  | 2020 | 111.78 | 38.65 | natural | 4089.7098  | 127770.4485 | 0.0758 |
| Shanxi  | 2030 | 112.95 | 39.30 | natural | 2820.5128  | 79446.6937  | 0.0741 |
| Shanxi  | 2010 | 113.97 | 39.93 | natural | 943.2421   | 23666.8028  | 0.2449 |
| Shanxi  | 2637 | 107.90 | 33.50 | natural | 1255.0996  | 32843.7725  | 0.4167 |
| Shanxi  | 2060 | 106.10 | 33.30 | natural | 12597.0149 | 243940.2985 | 0.0335 |
| Shanxi  | 2137 | 108.30 | 33.30 | natural | 2773.7226  | 69169.0062  | 0.1781 |
| Shanxi  | 1950 | 108.40 | 33.40 | natural | 10555.5556 | 177870.3704 | 0.0432 |
| Shanxi  | 2210 | 108.50 | 33.50 | natural | 4113.6364  | 107522.7273 | 0.1320 |
| Shanxi  | 1700 | 108.00 | 33.50 | natural | 13656.2500 | 463812.5000 | 0.0320 |
| Shanxi  | 1700 | 107.50 | 33.20 | natural | 3308.6420  | 94921.8107  | 0.1215 |
| Sichuan | 3200 | 104.19 | 32.98 | natural | 8960.0000  | 252920.0000 | 0.0500 |
| Sichuan | 3300 | 98.80  | 31.20 | natural | 3152.1739  | 72995.6522  | 0.2300 |
| Sichuan | 2580 | 102.70 | 30.60 | natural | 5411.9318  | 166235.7955 | 0.0704 |
| Sichuan | 2600 | 103.10 | 31.40 | natural | 7958.3746  | 237770.0694 | 0.1009 |
| Sichuan | 3200 | 104.83 | 33.50 | natural | 3230.7692  | 89884.6154  | 0.0780 |
| Sichuan | 3200 | 104.91 | 33.53 | natural | 5679.4872  | 156858.9744 | 0.0780 |
| Sichuan | 3180 | 103.69 | 33.57 | natural | 6408.3333  | 138158.3333 | 0.1200 |
| Sichuan | 3200 | 103.77 | 33.33 | natural | 8835.8209  | 196014.9254 | 0.0670 |
| Sichuan | 2850 | 102.30 | 30.90 | natural | 7511.0457  | 236642.1208 | 0.0679 |
| Sichuan | 2185 | 103.10 | 30.90 | natural | 9162.7907  | 273000.0000 | 0.0430 |
| Tibet   | 2300 | 95.00  | 30.10 | natural | 21391.1290 | 581370.9677 | 0.0496 |
| Tibet   | 3355 | 93.30  | 29.50 | natural | 4151.7857  | 125803.5714 | 0.0672 |
| Tibet   | 3500 | 85.20  | 28.90 | natural | 12416.1074 | 416107.3826 | 0.0149 |
| Tibet   | 2335 | 96.70  | 28.70 | natural | 24100.7194 | 605323.7410 | 0.0278 |
| Tibet   | 2010 | 97.00  | 28.40 | natural | 3064.3612  | 63924.1114  | 0.2082 |
| Yunnan  | 3012 | 99.20  | 27.10 | natural | 5486.2658  | 161343.7268 | 0.1347 |
| Yunnan  | 3640 | 107.80 | 27.10 | natural | 4240.0000  | 140275.5556 | 0.2250 |
| Yunnan  | 3400 | 99.70  | 27.70 | natural | 1014.8125  | 25694.9259  | 0.3173 |

**Desert riverside woodland**



|                                                                 |      |        |       |         |             |              |        |
|-----------------------------------------------------------------|------|--------|-------|---------|-------------|--------------|--------|
| Sinkiang                                                        | 900  | 80.80  | 38.40 | natural | 2000.0000   | 126242.8571  | 0.0700 |
| Sinkiang                                                        | 900  | 88.10  | 40.10 | natural | 4200.0000   | 329400.0000  | 0.0100 |
| Sinkiang                                                        | 900  | 80.60  | 40.40 | natural | 5250.0000   | 418083.3333  | 0.0120 |
| Sinkiang                                                        | 925  | 85.20  | 41.50 | natural | 2487.5000   | 74037.5000   | 0.0800 |
| Sinkiang                                                        | 900  | 82.90  | 41.70 | natural | 7000.0000   | 555142.8571  | 0.0140 |
| Sinkiang                                                        | 900  | 80.80  | 40.40 | natural | 1004.0161   | 66224.8996   | 0.0498 |
| Sinkiang                                                        | 950  | 84.30  | 41.70 | natural | 1469.9332   | 119665.9243  | 0.0449 |
| Sinkiang                                                        | 650  | 86.20  | 44.30 | natural | 951.7872    | 34904.4057   | 0.2406 |
| Sinkiang                                                        | 500  | 86.40  | 48.00 | natural | 5632.1839   | 178007.6628  | 0.0261 |
| <b>Subtropical mixed evergreen-deciduous broadleaved forest</b> |      |        |       |         |             |              |        |
| Fujian                                                          | 1330 | 117.30 | 27.10 | natural | 5160.9756   | 122736.5854  | 0.2050 |
| Fujian                                                          | 470  | 117.30 | 27.30 | natural | 8417.8322   | 130052.4476  | 0.1144 |
| Guizhou                                                         | 1093 | 106.70 | 26.40 | natural | 5977.6536   | 169056.4867  | 0.1611 |
| Guizhou                                                         | 1580 | 107.00 | 28.20 | natural | 7114.5686   | 174389.4389  | 0.2121 |
| Guizhou                                                         | 600  | 107.98 | 25.25 | natural | 1886.6667   | 104066.6667  | 0.1500 |
| Guizhou                                                         | 1985 | 106.80 | 28.10 | natural | 7710.4785   | 220423.9855  | 0.1651 |
| Guizhou                                                         | 2150 | 104.20 | 26.80 | natural | 2046.8998   | 37110.4928   | 0.2516 |
| Guizhou                                                         | 1420 | 108.00 | 26.00 | natural | 2086.9565   | 46060.8696   | 0.2300 |
| Henan                                                           | 1296 | 111.60 | 33.60 | natural | 3549.4505   | 74258.2418   | 0.1820 |
| Henan                                                           | 1080 | 111.30 | 33.60 | natural | 2128.4501   | 39973.4607   | 0.1884 |
| Henan                                                           | 500  | 114.80 | 31.60 | natural | 2344.6328   | 46065.3753   | 0.2478 |
| Henan                                                           | 1142 | 111.70 | 33.50 | natural | 4212.5000   | 85562.5000   | 0.1600 |
| Hubei                                                           | 1827 | 110.60 | 31.70 | natural | 7142.8571   | 159730.6122  | 0.1225 |
| Hubei                                                           | 1600 | 110.70 | 32.00 | natural | 6396.8411   | 131510.3653  | 0.1013 |
| Hubei                                                           | 1730 | 110.30 | 31.13 | natural | 4499.3234   | 108322.0568  | 0.1478 |
| Hunan                                                           | 500  | 110.40 | 29.10 | natural | 4972.2222   | 84944.4444   | 0.1080 |
| Hunan                                                           | 1210 | 110.10 | 29.30 | natural | 15231.9109  | 362059.3692  | 0.0539 |
| Shanxi                                                          | 1800 | 108.20 | 33.00 | natural | 18504.3478  | 290086.9565  | 0.0575 |
| Sichuan                                                         | 1635 | 106.80 | 32.30 | natural | 6838.4279   | 168829.6943  | 0.1145 |
| Tibet                                                           | 2075 | 96.70  | 28.70 | natural | 30465.9498  | 1333763.4409 | 0.0279 |
| Yunnan                                                          | 2518 | 99.20  | 27.10 | natural | 4439.9460   | 168697.7058  | 0.1482 |
| Yunnan                                                          | 2600 | 99.70  | 27.70 | natural | 6687.9489   | 237797.2865  | 0.1253 |
| <b>Subtropical evergreen broadleaved forest</b>                 |      |        |       |         |             |              |        |
| Fujian                                                          | 400  | 116.30 | 25.80 | natural | 6158.4158   | 122000.0000  | 0.1515 |
| Fujian                                                          | 400  | 119.30 | 26.00 | natural | 36153.8462  | 883020.6379  | 0.0533 |
| Fujian                                                          | 400  | 117.20 | 24.70 | natural | 11968.3544  | 248329.1139  | 0.1580 |
| Fujian                                                          | 870  | 118.10 | 27.00 | natural | 4317.3913   | 87673.9130   | 0.2300 |
| Fujian                                                          | 380  | 118.10 | 27.10 | natural | 16510.6383  | 333540.4255  | 0.1175 |
| Fujian                                                          | 650  | 118.70 | 26.30 | natural | 5235.0877   | 104487.7193  | 0.2850 |
| Fujian                                                          | 860  | 118.00 | 26.70 | natural | 151333.3333 | 3768400.0000 | 0.0150 |
| Fujian                                                          | 1100 | 118.10 | 26.60 | natural | 1466.6667   | 37127.7778   | 0.5400 |
| Fujian                                                          | 550  | 118.50 | 27.60 | natural | 5373.7043   | 112089.4708  | 0.1833 |
| Fujian                                                          | 423  | 117.40 | 26.10 | natural | 36240.0000  | 880288.0000  | 0.0625 |
| Fujian                                                          | 750  | 116.40 | 25.00 | natural | 9055.1839   | 183720.7358  | 0.1196 |

|           |      |        |       |         |            |              |        |
|-----------|------|--------|-------|---------|------------|--------------|--------|
| Fujian    | 750  | 117.10 | 27.20 | natural | 11762.2610 | 261438.0715  | 0.1203 |
| Fujian    | 793  | 117.60 | 27.10 | natural | 7394.3925  | 146844.8598  | 0.2675 |
| Fujian    | 438  | 117.40 | 27.30 | natural | 54700.2398 | 1209088.7290 | 0.0417 |
| Fujian    | 415  | 117.60 | 27.00 | natural | 50207.8522 | 1144711.3164 | 0.0433 |
| Fujian    | 450  | 117.50 | 25.20 | natural | 10460.0000 | 209746.6667  | 0.1500 |
| Guangdong | 270  | 112.58 | 23.13 | natural | 18556.5476 | 633139.8810  | 0.0672 |
| Guangdong | 80   | 110.00 | 20.70 | natural | 16085.7143 | 196523.8095  | 0.1050 |
| Guangdong | 380  | 111.88 | 23.45 | natural | 3979.6737  | 94549.3447   | 0.3739 |
| Guangdong | 400  | 115.60 | 22.90 | natural | 17276.1905 | 361923.8095  | 0.0525 |
| Guangdong | 500  | 114.00 | 24.90 | natural | 5264.2416  | 104337.6802  | 0.1457 |
| Guangxi   | 500  | 110.82 | 24.83 | natural | 2740.9091  | 100981.8182  | 0.2200 |
| Guangxi   | 1002 | 108.62 | 25.10 | natural | 17183.6735 | 371292.5170  | 0.0735 |
| Guangxi   | 820  | 109.97 | 25.45 | natural | 13675.0000 | 288550.0000  | 0.0800 |
| Guangxi   | 1085 | 109.93 | 25.45 | natural | 6906.5232  | 139361.1298  | 0.1487 |
| Guangxi   | 1680 | 109.98 | 25.60 | natural | 16838.7097 | 355580.6452  | 0.0620 |
| Guangxi   | 550  | 110.64 | 25.17 | natural | 13907.8156 | 284989.9800  | 0.0499 |
| Guangxi   | 835  | 110.28 | 25.67 | natural | 11592.4276 | 240835.1893  | 0.0898 |
| Guangxi   | 450  | 110.28 | 25.97 | natural | 1992.5611  | 45961.7428   | 0.1882 |
| Guangxi   | 500  | 110.10 | 25.90 | natural | 3792.7873  | 78493.2763   | 0.3272 |
| Guangxi   | 700  | 108.36 | 23.57 | natural | 6117.5236  | 67208.8143   | 0.1906 |
| Guangxi   | 700  | 109.63 | 25.10 | natural | 26583.1435 | 573986.3326  | 0.0439 |
| Guangxi   | 1160 | 107.71 | 21.85 | natural | 4806.9936  | 50978.6558   | 0.4404 |
| Guangxi   | 1550 | 106.34 | 24.45 | natural | 27993.1973 | 767823.1293  | 0.0294 |
| Guangxi   | 1978 | 106.40 | 24.52 | natural | 13630.9524 | 361646.8254  | 0.0504 |
| Guangxi   | 1100 | 104.41 | 24.23 | natural | 4783.4101  | 111244.2396  | 0.1085 |
| Guangxi   | 1172 | 104.68 | 24.58 | natural | 5112.4260  | 128000.0000  | 0.0845 |
| Guangxi   | 305  | 109.93 | 25.17 | natural | 2284.3701  | 51014.1140   | 0.1913 |
| Guangxi   | 468  | 109.75 | 25.38 | natural | 18931.4195 | 393110.0478  | 0.0627 |
| Guangxi   | 500  | 110.60 | 26.00 | natural | 16615.3846 | 370717.9487  | 0.0585 |
| Guangxi   | 560  | 110.00 | 25.70 | natural | 16329.3468 | 357010.1196  | 0.1087 |
| Guangxi   | 700  | 110.60 | 26.00 | natural | 1678.5714  | 28208.3333   | 0.1680 |
| Guizhou   | 965  | 106.00 | 24.75 | natural | 4982.3633  | 122345.6790  | 0.1134 |
| Guizhou   | 540  | 105.80 | 25.00 | natural | 24367.6471 | 763941.1765  | 0.0680 |
| Guizhou   | 1543 | 105.87 | 28.32 | natural | 2597.4982  | 57954.3782   | 0.2718 |
| Guizhou   | 1400 | 105.70 | 28.32 | natural | 3198.9597  | 75123.5371   | 0.1538 |
| Guizhou   | 1073 | 105.83 | 28.35 | natural | 2326.5742  | 52801.4941   | 0.1874 |
| Guizhou   | 800  | 106.20 | 28.53 | natural | 1754.6778  | 37367.9834   | 0.2405 |
| Guizhou   | 840  | 106.16 | 28.65 | natural | 2520.7861  | 59051.3983   | 0.2646 |
| Guizhou   | 750  | 108.45 | 25.50 | natural | 2253.1646  | 51417.7215   | 0.2765 |
| Guizhou   | 1200 | 108.33 | 25.58 | natural | 1401.9746  | 31743.3004   | 0.3545 |
| Guizhou   | 1400 | 108.29 | 25.62 | natural | 5638.4181  | 143175.1412  | 0.0885 |
| Guizhou   | 560  | 107.97 | 26.20 | natural | 3338.3234  | 71347.3054   | 0.2004 |
| Guizhou   | 892  | 108.00 | 26.23 | natural | 1078.7081  | 21640.0125   | 0.6378 |
| Guizhou   | 1080 | 107.93 | 26.27 | natural | 1912.5249  | 41602.3857   | 0.2515 |

|         |      |        |       |         |            |             |        |
|---------|------|--------|-------|---------|------------|-------------|--------|
| Guizhou | 900  | 107.97 | 26.30 | natural | 2737.3237  | 59370.9493  | 0.2623 |
| Guizhou | 1415 | 107.44 | 29.22 | natural | 1751.1067  | 39837.6783  | 0.2033 |
| Guizhou | 1280 | 107.71 | 28.68 | natural | 2205.9349  | 45770.4684  | 0.2797 |
| Guizhou | 1340 | 107.68 | 25.90 | natural | 6242.2635  | 152298.8506 | 0.1131 |
| Guizhou | 1900 | 104.57 | 27.13 | natural | 7447.6987  | 184748.9540 | 0.0478 |
| Guizhou | 1190 | 107.63 | 26.95 | natural | 2829.9204  | 68324.8009  | 0.3516 |
| Guizhou | 870  | 108.55 | 26.45 | natural | 3895.7346  | 92559.2417  | 0.1055 |
| Guizhou | 700  | 108.83 | 26.52 | natural | 2362.2181  | 55738.5111  | 0.5897 |
| Guizhou | 700  | 108.71 | 26.73 | natural | 24278.9598 | 663144.2080 | 0.0423 |
| Guizhou | 860  | 109.39 | 26.55 | natural | 1619.7416  | 36767.1414  | 0.9057 |
| Guizhou | 950  | 107.98 | 26.52 | natural | 2505.2720  | 56242.0919  | 0.2371 |
| Guizhou | 1600 | 108.16 | 26.33 | natural | 3561.9940  | 85262.0366  | 0.2347 |
| Guizhou | 1430 | 108.27 | 26.42 | natural | 3063.1527  | 70004.9727  | 0.2011 |
| Guizhou | 1865 | 108.23 | 26.52 | natural | 3820.5980  | 90730.8970  | 0.1505 |
| Guizhou | 915  | 108.20 | 26.40 | natural | 7307.6923  | 177224.0803 | 0.1196 |
| Guizhou | 1785 | 108.00 | 26.30 | natural | 8809.5238  | 227823.1293 | 0.0882 |
| Guizhou | 490  | 108.92 | 25.95 | natural | 3072.8825  | 73000.6566  | 0.1523 |
| Guizhou | 780  | 108.96 | 25.95 | natural | 2659.5745  | 60494.3680  | 0.1598 |
| Guizhou | 800  | 109.36 | 26.02 | natural | 6798.6799  | 164174.9175 | 0.1212 |
| Guizhou | 780  | 109.40 | 26.08 | natural | 2194.3973  | 50382.0034  | 0.2356 |
| Guizhou | 670  | 109.28 | 26.20 | natural | 3866.5526  | 87647.5620  | 0.1169 |
| Guizhou | 750  | 109.32 | 26.23 | natural | 2077.9934  | 47638.2278  | 0.5462 |
| Guizhou | 800  | 107.79 | 25.21 | natural | 4012.5000  | 94156.2500  | 0.1600 |
| Guizhou | 800  | 107.91 | 25.21 | natural | 3448.1062  | 78165.2730  | 0.2033 |
| Guizhou | 815  | 107.95 | 25.21 | natural | 1980.4699  | 42648.7641  | 0.3277 |
| Guizhou | 750  | 107.99 | 25.21 | natural | 3101.7573  | 70498.5697  | 0.2447 |
| Guizhou | 790  | 107.95 | 25.25 | natural | 2089.4006  | 46065.0186  | 0.2953 |
| Guizhou | 850  | 107.99 | 25.25 | natural | 2901.0239  | 64618.8851  | 0.2637 |
| Guizhou | 900  | 107.87 | 25.30 | natural | 3038.9817  | 67549.7216  | 0.1257 |
| Guizhou | 953  | 107.91 | 25.33 | natural | 2574.7508  | 57296.5116  | 0.2408 |
| Guizhou | 600  | 108.06 | 25.37 | natural | 1260.1969  | 26334.7398  | 0.3555 |
| Guizhou | 650  | 108.14 | 25.37 | natural | 1717.1717  | 36310.7263  | 0.2079 |
| Guizhou | 700  | 107.99 | 25.40 | natural | 3333.3333  | 82559.1398  | 0.1395 |
| Guizhou | 760  | 108.02 | 25.40 | natural | 1310.2119  | 27055.8767  | 0.2595 |
| Guizhou | 970  | 107.67 | 25.43 | natural | 2363.7138  | 56379.8978  | 0.2348 |
| Guizhou | 850  | 108.14 | 25.43 | natural | 2496.3645  | 57716.9171  | 0.2063 |
| Guizhou | 700  | 107.79 | 25.47 | natural | 2323.8950  | 52796.9613  | 0.2896 |
| Guizhou | 800  | 108.10 | 25.52 | natural | 1882.0786  | 40176.5490  | 0.3002 |
| Guizhou | 800  | 108.14 | 25.52 | natural | 2150.7863  | 46951.8964  | 0.2162 |
| Guizhou | 1500 | 107.04 | 25.55 | natural | 1282.0513  | 25817.0685  | 0.2613 |
| Guizhou | 1000 | 107.88 | 25.55 | natural | 1640.0426  | 33874.3344  | 0.4695 |
| Guizhou | 650  | 107.92 | 25.55 | natural | 3529.4118  | 81880.4243  | 0.1037 |
| Guizhou | 540  | 107.96 | 25.55 | natural | 4484.1675  | 101103.1665 | 0.1958 |
| Guizhou | 850  | 108.05 | 25.58 | natural | 1853.9326  | 38968.3350  | 0.1958 |

|         |      |        |       |         |            |             |        |
|---------|------|--------|-------|---------|------------|-------------|--------|
| Guizhou | 700  | 108.09 | 25.58 | natural | 4275.3623  | 96280.1932  | 0.1242 |
| Guizhou | 1462 | 106.97 | 26.37 | natural | 12573.1895 | 328382.1263 | 0.0649 |
| Guizhou | 710  | 106.96 | 25.43 | natural | 6049.5283  | 148360.8491 | 0.0848 |
| Guizhou | 1090 | 107.13 | 26.02 | natural | 3309.3525  | 74532.3741  | 0.1668 |
| Guizhou | 754  | 108.05 | 25.75 | natural | 2281.4070  | 52517.5879  | 0.1990 |
| Guizhou | 1032 | 108.12 | 26.02 | natural | 3310.6961  | 77674.0238  | 0.1767 |
| Guizhou | 620  | 108.20 | 26.02 | natural | 8328.2365  | 206085.6269 | 0.0981 |
| Guizhou | 810  | 107.93 | 26.02 | natural | 4781.7558  | 108813.1437 | 0.2039 |
| Guizhou | 950  | 108.05 | 27.17 | natural | 2078.3373  | 43377.2982  | 0.2502 |
| Guizhou | 980  | 108.45 | 27.53 | natural | 9320.6951  | 235418.6414 | 0.0633 |
| Guizhou | 850  | 109.25 | 28.13 | natural | 5679.5132  | 140507.0994 | 0.0986 |
| Guizhou | 1619 | 108.31 | 26.55 | natural | 3134.0405  | 77531.3404  | 0.2074 |
| Guizhou | 500  | 109.35 | 26.73 | natural | 4034.2429  | 90117.7100  | 0.1869 |
| Guizhou | 700  | 109.02 | 27.10 | natural | 19727.8912 | 532891.1565 | 0.0588 |
| Guizhou | 420  | 109.34 | 27.70 | natural | 7086.3971  | 168630.5147 | 0.1088 |
| Guizhou | 885  | 106.12 | 25.03 | natural | 6618.8769  | 166045.4002 | 0.0837 |
| Guizhou | 680  | 106.24 | 25.07 | natural | 18561.6438 | 478664.3836 | 0.0292 |
| Guizhou | 740  | 107.23 | 27.02 | natural | 1834.2800  | 41132.6428  | 0.2993 |
| Guizhou | 1030 | 107.63 | 27.02 | natural | 2685.3984  | 62441.2713  | 0.2171 |
| Guizhou | 1210 | 107.59 | 27.05 | natural | 1976.1800  | 43242.1703  | 0.2267 |
| Guizhou | 1030 | 107.67 | 27.13 | natural | 2231.3204  | 51069.6008  | 0.1954 |
| Guizhou | 1500 | 106.70 | 27.10 | natural | 12738.6692 | 328341.3693 | 0.1037 |
| Guizhou | 1120 | 106.03 | 28.35 | natural | 3355.0186  | 81821.5613  | 0.1076 |
| Guizhou | 1180 | 106.03 | 28.40 | natural | 3735.4651  | 80283.4302  | 0.1376 |
| Guizhou | 1320 | 106.07 | 28.40 | natural | 3072.7273  | 73000.0000  | 0.1650 |
| Guizhou | 1100 | 106.07 | 28.43 | natural | 3212.5604  | 79130.4348  | 0.1242 |
| Guizhou | 1380 | 106.19 | 28.43 | natural | 1743.5321  | 35753.6558  | 0.3556 |
| Guizhou | 1360 | 106.32 | 28.50 | natural | 4548.6111  | 109222.2222 | 0.1440 |
| Guizhou | 990  | 106.24 | 28.53 | natural | 5680.6084  | 140501.9011 | 0.1315 |
| Guizhou | 1120 | 106.28 | 28.53 | natural | 3072.5943  | 72999.4373  | 0.1777 |
| Guizhou | 1210 | 106.40 | 28.57 | natural | 3072.5943  | 72999.4373  | 0.1777 |
| Guizhou | 1460 | 106.48 | 28.57 | natural | 1761.6034  | 42410.3376  | 0.1896 |
| Guizhou | 1186 | 104.61 | 25.75 | natural | 7102.9836  | 175909.5284 | 0.1039 |
| Guizhou | 740  | 108.43 | 28.25 | natural | 4442.1199  | 106338.9121 | 0.1434 |
| Guizhou | 727  | 108.14 | 28.68 | natural | 2228.7145  | 47992.4875  | 0.2396 |
| Guizhou | 760  | 108.19 | 28.97 | natural | 1311.3855  | 27111.1111  | 0.3645 |
| Guizhou | 1030 | 108.60 | 27.97 | natural | 1666.0733  | 35382.6985  | 0.2809 |
| Guizhou | 1010 | 108.30 | 27.17 | natural | 2065.4149  | 52337.9770  | 0.1651 |
| Guizhou | 1160 | 106.36 | 25.40 | natural | 4916.3347  | 118342.6295 | 0.1255 |
| Guizhou | 1072 | 108.65 | 27.90 | natural | 4001.6779  | 98292.7852  | 0.2384 |
| Guizhou | 851  | 108.13 | 25.77 | natural | 3754.6012  | 84539.8773  | 0.1630 |
| Guizhou | 864  | 108.53 | 25.90 | natural | 3076.3689  | 72997.1182  | 0.1388 |
| Guizhou | 645  | 108.32 | 25.98 | natural | 4041.1523  | 94032.9218  | 0.1215 |
| Guizhou | 1290 | 108.60 | 26.08 | natural | 5364.5485  | 123525.0836 | 0.1495 |

|         |      |        |       |         |            |              |        |
|---------|------|--------|-------|---------|------------|--------------|--------|
| Guizhou | 600  | 108.48 | 26.30 | natural | 4091.3508  | 100029.1545  | 0.1029 |
| Guizhou | 710  | 108.47 | 26.42 | natural | 2450.7874  | 54335.6299   | 0.2032 |
| Hunan   | 1390 | 110.16 | 26.18 | natural | 2241.3793  | 50240.6609   | 0.2784 |
| Hunan   | 650  | 110.20 | 26.35 | natural | 4792.8026  | 97502.7263   | 0.1834 |
| Hunan   | 870  | 110.56 | 26.53 | natural | 5078.0829  | 104119.5477  | 0.1857 |
| Hunan   | 1150 | 110.20 | 26.20 | natural | 26318.9270 | 618196.7213  | 0.0671 |
| Hunan   | 450  | 109.75 | 26.83 | natural | 13537.7778 | 309653.3333  | 0.1125 |
| Hunan   | 1120 | 111.55 | 24.70 | natural | 59409.4488 | 1505472.4409 | 0.0254 |
| Hunan   | 550  | 111.70 | 24.90 | natural | 29171.7791 | 672085.8896  | 0.0978 |
| Hunan   | 910  | 110.96 | 25.02 | natural | 12410.4859 | 249520.4604  | 0.1564 |
| Hunan   | 1332 | 111.95 | 25.20 | natural | 19271.1864 | 406135.5932  | 0.0590 |
| Hunan   | 650  | 111.36 | 25.50 | natural | 5793.5200  | 117935.2004  | 0.1821 |
| Hunan   | 650  | 111.30 | 25.20 | natural | 6208.4257  | 128203.9911  | 0.1353 |
| Hunan   | 500  | 109.51 | 26.62 | natural | 8533.9943  | 172507.0822  | 0.1412 |
| Hunan   | 700  | 112.80 | 24.90 | natural | 10677.7778 | 224777.7778  | 0.0900 |
| Hunan   | 510  | 113.78 | 25.50 | natural | 4390.9586  | 89217.2457   | 0.2389 |
| Hunan   | 1440 | 110.13 | 29.78 | natural | 2857.5320  | 61329.3381   | 0.3671 |
| Hunan   | 430  | 111.76 | 25.88 | natural | 2836.6317  | 60845.9449   | 0.2577 |
| Hunan   | 870  | 110.12 | 26.43 | natural | 8938.4289  | 180859.8726  | 0.0942 |
| Hunan   | 740  | 110.12 | 26.72 | natural | 11178.3439 | 229466.5605  | 0.1256 |
| Hunan   | 768  | 110.36 | 26.72 | natural | 4118.0203  | 84302.0305   | 0.1576 |
| Hunan   | 860  | 110.12 | 26.78 | natural | 7621.8487  | 153436.9748  | 0.1190 |
| Hunan   | 880  | 110.19 | 26.93 | natural | 8197.4922  | 163385.5799  | 0.1914 |
| Hunan   | 390  | 110.90 | 29.10 | natural | 5107.4956  | 116647.2981  | 0.1721 |
| Hunan   | 580  | 109.84 | 26.35 | natural | 2201.0399  | 49569.6129   | 0.3462 |
| Hunan   | 1260 | 110.60 | 26.70 | natural | 12361.6734 | 276504.7233  | 0.0741 |
| Hunan   | 1050 | 112.86 | 24.95 | natural | 2503.5162  | 54989.4515   | 0.2844 |
| Hunan   | 1110 | 112.74 | 24.98 | natural | 3511.2564  | 72730.5737   | 0.2754 |
| Hunan   | 910  | 112.82 | 24.98 | natural | 1796.0763  | 42594.6394   | 0.3619 |
| Hunan   | 1480 | 112.98 | 24.98 | natural | 3565.1007  | 74204.0268   | 0.3725 |
| Hunan   | 600  | 110.26 | 28.73 | natural | 3320.2568  | 69418.6876   | 0.2804 |
| Hunan   | 570  | 110.26 | 28.82 | natural | 4123.3244  | 83667.5603   | 0.1865 |
| Hunan   | 570  | 113.36 | 26.25 | natural | 9054.7703  | 188454.0636  | 0.1132 |
| Hunan   | 700  | 110.47 | 28.13 | natural | 13501.5448 | 282409.8867  | 0.0971 |
| Hunan   | 740  | 110.59 | 28.23 | natural | 4842.3773  | 97317.8295   | 0.1935 |
| Hunan   | 670  | 110.63 | 28.27 | natural | 5027.7778  | 100597.2222  | 0.1440 |
| Hunan   | 410  | 113.69 | 28.38 | natural | 2463.8193  | 54182.8450   | 0.2833 |
| Hunan   | 633  | 113.68 | 26.25 | natural | 5574.7410  | 111687.2225  | 0.2027 |
| Hunan   | 550  | 113.64 | 26.28 | natural | 5002.1863  | 101836.4670  | 0.2287 |
| Hunan   | 1300 | 113.76 | 26.10 | natural | 5470.5882  | 109470.5882  | 0.1530 |
| Hunan   | 1200 | 113.84 | 26.25 | natural | 6408.8670  | 127704.4335  | 0.2030 |
| Hunan   | 680  | 113.64 | 26.35 | natural | 6880.4665  | 143542.2741  | 0.1372 |
| Hunan   | 575  | 113.73 | 26.43 | natural | 11277.0563 | 234033.1890  | 0.1386 |
| Hunan   | 250  | 114.05 | 26.50 | natural | 3395.4727  | 71181.7577   | 0.3004 |

|         |      |        |       |         |            |              |        |
|---------|------|--------|-------|---------|------------|--------------|--------|
| Hunan   | 827  | 113.70 | 26.50 | natural | 11597.0962 | 252749.5463  | 0.1102 |
| Hunan   | 500  | 112.30 | 28.80 | natural | 1838.8489  | 43738.1295   | 0.3475 |
| Hunan   | 360  | 114.02 | 28.23 | natural | 1405.7101  | 36117.4759   | 0.5499 |
| Hunan   | 1040 | 114.15 | 28.48 | natural | 2969.2058  | 63076.1750   | 0.3085 |
| Jiangxi | 600  | 114.40 | 26.50 | natural | 9630.9524  | 188654.7619  | 0.1680 |
| Jiangxi | 688  | 114.50 | 28.40 | natural | 1589.1865  | 25156.6448   | 0.3958 |
| Jiangxi | 601  | 114.50 | 28.40 | natural | 11131.1054 | 251593.8303  | 0.0778 |
| Jiangxi | 483  | 114.60 | 28.40 | natural | 19865.0927 | 429005.0590  | 0.0593 |
| Jiangxi | 538  | 114.70 | 28.30 | natural | 16057.8035 | 352693.6416  | 0.0865 |
| Jiangxi | 813  | 114.70 | 28.30 | natural | 1164.8250  | 25209.4843   | 0.4344 |
| Sichuan | 1900 | 103.40 | 28.30 | natural | 40372.3404 | 1181968.0851 | 0.0188 |
| Sichuan | 1520 | 103.50 | 28.80 | natural | 17618.1474 | 464404.5369  | 0.0529 |
| Sichuan | 1200 | 106.39 | 28.64 | natural | 9286.5780  | 216517.5333  | 0.0827 |
| Tibet   | 1900 | 97.40  | 28.60 | natural | 8625.0000  | 236401.7857  | 0.1120 |
| Tibet   | 2670 | 94.90  | 30.20 | natural | 15916.9550 | 607785.4671  | 0.0289 |
| Tibet   | 2980 | 85.20  | 28.90 | natural | 3577.8175  | 116994.6333  | 0.1118 |
| Tibet   | 2020 | 97.00  | 28.40 | natural | 8104.8387  | 306431.4516  | 0.0992 |
| Tibet   | 2020 | 85.90  | 27.90 | natural | 6234.1463  | 247892.6829  | 0.1025 |
| Yunnan  | 2823 | 99.32  | 27.53 | natural | 7663.3663  | 304811.8812  | 0.1010 |
| Yunnan  | 3385 | 98.96  | 27.97 | natural | 6768.0180  | 241689.1892  | 0.0888 |
| Yunnan  | 2550 | 101.00 | 24.53 | natural | 1820.0000  | 245585.0000  | 0.2000 |
| Yunnan  | 2394 | 99.68  | 25.28 | natural | 3467.9021  | 119497.0218  | 0.1511 |
| Yunnan  | 2488 | 99.73  | 25.28 | natural | 8122.2222  | 328644.4444  | 0.0900 |
| Yunnan  | 2645 | 99.68  | 25.43 | natural | 8370.4235  | 308033.0223  | 0.1393 |
| Yunnan  | 3460 | 98.78  | 28.10 | natural | 3224.0964  | 117195.1807  | 0.2075 |
| Yunnan  | 3340 | 98.90  | 28.18 | natural | 6537.7176  | 239825.9188  | 0.1034 |
| Yunnan  | 4160 | 99.02  | 28.75 | natural | 2810.0775  | 92577.5194   | 0.2064 |
| Yunnan  | 3135 | 99.56  | 26.08 | natural | 5222.9299  | 189851.3800  | 0.0942 |
| Yunnan  | 2480 | 99.62  | 26.08 | natural | 5004.4366  | 149103.8154  | 0.1127 |
| Yunnan  | 3450 | 100.10 | 26.37 | natural | 34297.1888 | 1069076.3052 | 0.0249 |
| Yunnan  | 2783 | 100.34 | 26.52 | natural | 4056.6038  | 138799.3139  | 0.1166 |
| Yunnan  | 2040 | 101.19 | 26.45 | natural | 4779.3190  | 149489.2812  | 0.1586 |
| Yunnan  | 2903 | 99.56  | 26.23 | natural | 17869.1983 | 542911.3924  | 0.0474 |
| Yunnan  | 3060 | 99.80  | 26.67 | natural | 3922.6974  | 141167.7632  | 0.1216 |
| Yunnan  | 2860 | 100.35 | 27.02 | natural | 7874.8524  | 261109.7993  | 0.0847 |
| Yunnan  | 2860 | 99.44  | 27.17 | natural | 25309.0333 | 793280.5071  | 0.0631 |
| Yunnan  | 2780 | 99.75  | 27.17 | natural | 11875.0000 | 415777.0270  | 0.0592 |
| Yunnan  | 3240 | 100.23 | 27.17 | natural | 12969.3487 | 480000.0000  | 0.0522 |
| Yunnan  | 2900 | 99.44  | 27.38 | natural | 3506.3663  | 126513.2223  | 0.1021 |
| Yunnan  | 3300 | 100.89 | 26.73 | natural | 6908.8812  | 241914.6482  | 0.0867 |
| Yunnan  | 2920 | 100.72 | 27.17 | natural | 7539.2670  | 224149.2147  | 0.0764 |
| Yunnan  | 2570 | 100.90 | 27.32 | natural | 5115.6069  | 177061.6570  | 0.1038 |
| Yunnan  | 3280 | 100.54 | 27.67 | natural | 2633.0832  | 82100.7503   | 0.2799 |
| Yunnan  | 2900 | 98.78  | 25.58 | natural | 18415.1786 | 652857.1429  | 0.0448 |

|                                                                   |      |        |       |         |             |              |        |
|-------------------------------------------------------------------|------|--------|-------|---------|-------------|--------------|--------|
| Yunnan                                                            | 930  | 100.85 | 23.20 | natural | 3083.7438   | 78300.4926   | 0.2030 |
| Yunnan                                                            | 2850 | 99.92  | 25.58 | natural | 6859.8383   | 270040.4313  | 0.0742 |
| Yunnan                                                            | 2526 | 99.14  | 25.50 | natural | 6526.1514   | 234441.8423  | 0.1281 |
| Yunnan                                                            | 2790 | 99.08  | 25.80 | natural | 6612.9032   | 221388.8889  | 0.1116 |
| Yunnan                                                            | 2240 | 99.38  | 26.23 | natural | 7040.6732   | 246353.4362  | 0.0713 |
| Zhejiang                                                          | 275  | 120.17 | 30.25 | natural | 2906.9069   | 64498.4985   | 0.1665 |
| Zhejiang                                                          | 438  | 119.27 | 29.48 | natural | 1511.7801   | 29018.3246   | 0.4584 |
| <b>Sclerophyllous evergreen Quercus forest</b>                    |      |        |       |         |             |              |        |
| Sichuan                                                           | 3800 | 101.50 | 29.00 | natural | 8402.3669   | 259664.6943  | 0.1014 |
| Sichuan                                                           | 3800 | 101.20 | 27.90 | natural | 9059.2334   | 279895.4704  | 0.1148 |
| Tibet                                                             | 3000 | 97.40  | 28.60 | natural | 19002.6247  | 670419.9475  | 0.0381 |
| Tibet                                                             | 3281 | 96.10  | 29.70 | natural | 20100.7557  | 624836.2720  | 0.0397 |
| Tibet                                                             | 3020 | 95.70  | 29.80 | natural | 16723.3010  | 555024.2718  | 0.0412 |
| Tibet                                                             | 2925 | 94.30  | 29.50 | natural | 13101.4493  | 456405.7971  | 0.0345 |
| Tibet                                                             | 2375 | 85.90  | 27.90 | natural | 29333.3333  | 967636.3636  | 0.0165 |
| Tibet                                                             | 3103 | 91.90  | 27.90 | natural | 38793.9698  | 1464924.6231 | 0.0199 |
| Yunnan                                                            | 3400 | 99.70  | 27.70 | natural | 10581.0056  | 266446.9274  | 0.0895 |
| <b>Tropical rainforest and monsoon forest</b>                     |      |        |       |         |             |              |        |
| Hainan                                                            | 790  | 109.82 | 19.23 | natural | 7763.9752   | 508296.3620  | 0.1127 |
| Hainan                                                            | 15   | 110.73 | 19.50 | planted | 3965.4296   | 45526.1820   | 0.1967 |
| Hainan                                                            | 15   | 110.62 | 19.88 | planted | 10572.7273  | 375172.7273  | 0.1100 |
| Guangxi                                                           | 10   | 109.40 | 21.40 | natural | 11234.2857  | 132754.2857  | 0.0875 |
| Guangxi                                                           | 15   | 109.72 | 21.47 | planted | 950.0000    | 39148.6486   | 0.7400 |
| Yunnan                                                            | 585  | 110.42 | 21.68 | natural | 4372.0930   | 78217.0543   | 0.1290 |
| Guangxi                                                           | 20   | 109.60 | 21.70 | natural | 74800.0000  | 1772433.3333 | 0.0300 |
| Guangxi                                                           | 10   | 108.30 | 21.70 | natural | 13066.6667  | 164939.3939  | 0.1650 |
| Fujian                                                            | 15   | 117.92 | 24.40 | planted | 294.7115    | 7691.3462    | 2.0800 |
| Hainan                                                            | 875  | 108.68 | 18.62 | natural | 7809.6677   | 256621.3494  | 0.1986 |
| Hainan                                                            | 679  | 108.80 | 18.70 | natural | 6305.8590   | 322323.7339  | 0.1007 |
| Guangxi                                                           | 35   | 109.10 | 21.50 | planted | 6823.3618   | 76880.3419   | 0.1404 |
| Guangxi                                                           | 28   | 108.70 | 21.85 | natural | 7257.6636   | 82228.6661   | 0.1207 |
| <b>Subtropical montane Pinus yunnanensis and P. khasya forest</b> |      |        |       |         |             |              |        |
| Tibet                                                             | 2200 | 97.40  | 28.60 | natural | 36491.2281  | 2116257.3099 | 0.0171 |
| Yunnan                                                            | 2636 | 99.08  | 26.15 | natural | 57303.9216  | 1028676.4706 | 0.0204 |
| Yunnan                                                            | 2880 | 99.32  | 26.30 | natural | 108988.7640 | 2063595.5056 | 0.0089 |
| Yunnan                                                            | 3050 | 99.32  | 27.82 | natural | 7550.1114   | 120133.6303  | 0.0898 |
| Yunnan                                                            | 2020 | 99.38  | 25.72 | natural | 29756.9444  | 508854.1667  | 0.0288 |
| Yunnan                                                            | 2715 | 99.38  | 26.02 | natural | 18625.0000  | 309550.0000  | 0.0400 |
| Yunnan                                                            | 2940 | 99.44  | 27.23 | natural | 8640.1674   | 138190.3766  | 0.0956 |
| Yunnan                                                            | 2940 | 99.44  | 27.32 | natural | 47238.8060  | 834776.1194  | 0.0134 |
| Yunnan                                                            | 2550 | 99.50  | 25.72 | natural | 106732.6733 | 2017128.7129 | 0.0101 |
| Yunnan                                                            | 2980 | 99.50  | 27.17 | natural | 23753.2134  | 400282.7763  | 0.0389 |
| Yunnan                                                            | 3040 | 99.57  | 27.32 | natural | 142747.2527 | 2768131.8681 | 0.0091 |
| Yunnan                                                            | 2104 | 99.62  | 25.43 | natural | 3569.9039   | 55885.8058   | 0.1874 |

|                                            |      |        |       |         |             |              |        |
|--------------------------------------------|------|--------|-------|---------|-------------|--------------|--------|
| Yunnan                                     | 2340 | 99.62  | 25.58 | natural | 9537.8151   | 153277.3109  | 0.0714 |
| Yunnan                                     | 2635 | 99.62  | 25.87 | natural | 56517.4129  | 1020845.7711 | 0.0201 |
| Yunnan                                     | 3120 | 99.68  | 26.80 | natural | 1766.7436   | 27780.6005   | 0.4330 |
| Yunnan                                     | 2540 | 99.69  | 27.10 | natural | 12960.7843  | 211156.8627  | 0.0510 |
| Yunnan                                     | 2900 | 99.70  | 27.70 | natural | 1138.3260   | 18225.5507   | 0.5675 |
| Yunnan                                     | 2092 | 99.74  | 25.37 | natural | 46530.6122  | 821700.6803  | 0.0147 |
| Yunnan                                     | 2750 | 99.74  | 25.43 | natural | 8249.5667   | 131698.4402  | 0.1154 |
| Yunnan                                     | 2400 | 99.74  | 25.87 | natural | 15567.6856  | 255873.3624  | 0.0458 |
| Yunnan                                     | 2780 | 99.75  | 26.95 | natural | 8492.9577   | 135760.5634  | 0.0710 |
| Yunnan                                     | 1950 | 99.79  | 25.28 | natural | 27927.2727  | 475818.1818  | 0.0275 |
| Yunnan                                     | 1800 | 99.80  | 25.58 | natural | 12545.8248  | 203930.7536  | 0.0491 |
| Yunnan                                     | 1951 | 99.85  | 25.28 | natural | 22018.9274  | 369305.9937  | 0.0317 |
| Yunnan                                     | 2800 | 100.20 | 26.80 | natural | 7357.0948   | 125299.2603  | 0.1487 |
| Yunnan                                     | 2210 | 100.34 | 26.37 | natural | 11849.1921  | 158671.4542  | 0.0557 |
| Yunnan                                     | 3060 | 100.48 | 27.45 | natural | 2048.1530   | 32110.8179   | 0.3032 |
| Yunnan                                     | 3300 | 100.54 | 27.75 | natural | 16528.5996  | 272781.0651  | 0.0507 |
| Yunnan                                     | 2540 | 100.59 | 27.10 | natural | 78581.3149  | 1447266.4360 | 0.0289 |
| Yunnan                                     | 2940 | 100.60 | 27.82 | natural | 8941.3265   | 143214.2857  | 0.0784 |
| Yunnan                                     | 2730 | 100.65 | 27.10 | natural | 5522.0522   | 87056.7057   | 0.2222 |
| Yunnan                                     | 3278 | 100.66 | 27.67 | natural | 14733.1787  | 241438.5151  | 0.0431 |
| Yunnan                                     | 2779 | 100.70 | 26.70 | natural | 21200.0000  | 374433.3333  | 0.0600 |
| Yunnan                                     | 3110 | 100.72 | 27.32 | natural | 4375.0000   | 68659.7938   | 0.1552 |
| Yunnan                                     | 2735 | 100.76 | 26.45 | natural | 16497.5845  | 272101.4493  | 0.0414 |
| Yunnan                                     | 2850 | 100.89 | 26.45 | natural | 105605.0955 | 1994140.1274 | 0.0157 |
| Yunnan                                     | 2241 | 101.20 | 26.60 | natural | 12413.4078  | 218547.4860  | 0.0895 |
| Sichuan                                    | 2850 | 101.20 | 27.90 | natural | 8743.9614   | 150712.5604  | 0.0828 |
| Yunnan                                     | 2039 | 101.34 | 26.73 | natural | 21074.2188  | 357871.0938  | 0.0512 |
| Yunnan                                     | 2210 | 101.70 | 26.00 | natural | 12472.6477  | 213205.6893  | 0.0914 |
| Sichuan                                    | 2068 | 102.50 | 28.00 | natural | 3566.6667   | 52672.2222   | 0.1800 |
| Guizhou                                    | 2344 | 104.13 | 26.77 | natural | 828.8438    | 13564.0282   | 0.7239 |
| Guizhou                                    | 1697 | 104.41 | 26.73 | natural | 12747.8261  | 171165.2174  | 0.0575 |
| Guangxi                                    | 970  | 106.23 | 24.73 | natural | 70896.5517  | 1294000.0000 | 0.0145 |
| Guangxi                                    | 1011 | 106.29 | 24.80 | natural | 62212.3894  | 1123716.8142 | 0.0113 |
| Guangxi                                    | 206  | 106.29 | 24.95 | natural | 53553.7190  | 955785.1240  | 0.0121 |
| <b>Subtropical Pinus massoniana forest</b> |      |        |       |         |             |              |        |
| Guangxi                                    | 175  | 110.65 | 23.00 | planted | 18066.5281  | 258336.7983  | 0.0481 |
| Guangdong                                  | 200  | 113.70 | 23.00 | planted | 7750.2296   | 119274.5638  | 0.1089 |
| Guangdong                                  | 270  | 112.35 | 23.08 | planted | 7016.0000   | 86452.0000   | 0.2500 |
| Guangdong                                  | 500  | 115.10 | 23.60 | planted | 7633.8028   | 117596.2441  | 0.1065 |
| Guangxi                                    | 300  | 105.08 | 23.75 | planted | 20689.6552  | 465747.1264  | 0.0435 |
| Guangxi                                    | 380  | 111.77 | 24.23 | natural | 13856.0886  | 203210.3321  | 0.0542 |
| Guangxi                                    | 255  | 111.77 | 24.45 | planted | 17637.3626  | 252912.0879  | 0.0546 |
| Guangxi                                    | 215  | 108.28 | 24.58 | planted | 14388.8889  | 210388.8889  | 0.0540 |
| Jiangxi                                    | 600  | 114.50 | 24.70 | planted | 11656.1404  | 164343.8596  | 0.1425 |



|           |      |        |       |         |            |             |        |
|-----------|------|--------|-------|---------|------------|-------------|--------|
| Guangxi   | 490  | 108.80 | 24.80 | planted | 13770.4918 | 202071.5350 | 0.0671 |
| Jiangxi   | 600  | 114.40 | 24.80 | planted | 11726.3158 | 165263.1579 | 0.1425 |
| Hunan     | 380  | 111.30 | 25.30 | natural | 18134.9911 | 660071.0480 | 0.0563 |
| Guizhou   | 1390 | 105.13 | 25.58 | planted | 5719.2076  | 95951.7657  | 0.1161 |
| Fujian    | 820  | 116.90 | 25.70 | natural | 5755.2743  | 191409.2827 | 0.1185 |
| Guangxi   | 500  | 110.60 | 25.80 | natural | 9716.1290  | 147032.2581 | 0.0775 |
| Guangxi   | 500  | 110.10 | 25.90 | natural | 15468.1648 | 455205.9925 | 0.0534 |
| Guizhou   | 1050 | 106.65 | 26.23 | natural | 9723.2704  | 237270.4403 | 0.0795 |
| Guizhou   | 520  | 108.59 | 26.52 | natural | 12900.6085 | 327545.6389 | 0.0493 |
| Guizhou   | 500  | 109.35 | 26.63 | natural | 4362.8510  | 76025.9179  | 0.1389 |
| Hunan     | 410  | 109.59 | 26.83 | planted | 22678.5714 | 294030.6122 | 0.0392 |
| Hunan     | 300  | 109.75 | 26.83 | natural | 5160.0000  | 57165.7143  | 0.1750 |
| Hunan     | 275  | 109.90 | 26.90 | natural | 4544.8276  | 68279.3103  | 0.2900 |
| Guizhou   | 500  | 109.13 | 27.03 | natural | 9081.9209  | 140706.2147 | 0.0708 |
| Hunan     | 615  | 109.58 | 27.62 | natural | 14615.3846 | 200972.4238 | 0.0689 |
| Guizhou   | 1012 | 107.61 | 27.70 | natural | 14362.4161 | 202662.1924 | 0.0447 |
| Guizhou   | 540  | 108.12 | 28.25 | natural | 3264.1509  | 73193.3962  | 0.2120 |
| Hunan     | 500  | 111.10 | 28.30 | natural | 4322.9814  | 64637.6812  | 0.2415 |
| Guizhou   | 1330 | 106.97 | 28.47 | natural | 14425.6121 | 203258.0038 | 0.0531 |
| Hubei     | 680  | 109.30 | 29.40 | planted | 6852.7132  | 100875.9690 | 0.1290 |
| Hubei     | 1100 | 109.40 | 30.20 | planted | 2071.7489  | 30221.2257  | 0.3345 |
| Henan     | 400  | 114.80 | 31.60 | natural | 2418.7500  | 49925.0000  | 0.3200 |
| An'hui    | 400  | 118.20 | 32.20 | planted | 4818.4818  | 71920.7921  | 0.1515 |
| Guangxi   | 10   | 108.40 | 21.75 | natural | 5580.6597  | 70090.3751  | 0.2213 |
| Guangdong | 250  | 113.71 | 23.22 | planted | 6276.4706  | 101758.8235 | 0.1700 |
| Guangdong | 200  | 113.20 | 23.20 | planted | 5319.8653  | 83142.5365  | 0.1782 |
| Guangxi   | 450  | 111.50 | 24.10 | planted | 7737.1833  | 118043.6064 | 0.1697 |
| Guangxi   | 520  | 110.00 | 25.70 | natural | 13651.9387 | 202831.3796 | 0.1109 |
| Hunan     | 500  | 113.30 | 25.70 | natural | 4465.3465  | 67732.6733  | 0.2020 |
| Fujian    | 550  | 117.20 | 25.80 | natural | 8617.1063  | 123461.2310 | 0.1251 |
| Guangxi   | 800  | 110.60 | 26.00 | natural | 6722.4670  | 102757.7093 | 0.1135 |
| Guangxi   | 530  | 110.40 | 26.00 | natural | 10971.1846 | 162881.5368 | 0.0937 |
| Hunan     | 483  | 110.10 | 26.50 | natural | 14893.0818 | 461547.1698 | 0.0795 |
| Hunan     | 350  | 109.60 | 26.70 | natural | 9308.8858  | 134802.5388 | 0.1418 |
| Hunan     | 440  | 109.90 | 26.80 | natural | 16047.6788 | 497804.2660 | 0.0797 |
| Jiangxi   | 571  | 114.70 | 28.30 | natural | 9610.8491  | 235719.3396 | 0.0848 |
| Jiangxi   | 217  | 115.80 | 29.00 | planted | 8207.6503  | 135540.9836 | 0.0915 |
| An'hui    | 500  | 117.90 | 32.70 | planted | 3252.7964  | 42125.2796  | 0.2235 |
| Guangxi   | 475  | 107.65 | 21.92 | natural | 2447.9167  | 39385.4167  | 0.1920 |
| Guangxi   | 350  | 107.07 | 21.98 | planted | 2552.9265  | 41046.0772  | 0.1606 |
| Guangxi   | 300  | 105.08 | 23.75 | planted | 1623.1884  | 92637.6812  | 0.1725 |
| Guangxi   | 220  | 108.68 | 24.42 | planted | 4940.3341  | 310417.6611 | 0.0838 |
| Guizhou   | 1420 | 106.09 | 26.17 | planted | 2984.1270  | 54198.4127  | 0.1260 |
| Guizhou   | 1070 | 108.24 | 26.27 | natural | 9820.2614  | 149852.9412 | 0.0612 |

|          |      |        |       |         |            |             |        |
|----------|------|--------|-------|---------|------------|-------------|--------|
| Guizhou  | 700  | 108.00 | 26.33 | natural | 13235.2941 | 189936.9748 | 0.0476 |
| Guizhou  | 1106 | 106.73 | 26.33 | planted | 3223.2232  | 58158.1582  | 0.0999 |
| Guizhou  | 920  | 107.83 | 26.88 | natural | 7724.2303  | 123306.5596 | 0.0747 |
| Guizhou  | 760  | 106.60 | 28.00 | natural | 3224.7115  | 58173.7950  | 0.1473 |
| Guizhou  | 900  | 108.11 | 28.03 | natural | 4080.9444  | 71677.9089  | 0.1186 |
| Zhejiang | 500  | 119.90 | 28.40 | planted | 2094.3953  | 58943.9528  | 0.1695 |
| Zhejiang | 300  | 119.60 | 29.10 | planted | 3205.7971  | 38602.8986  | 0.1725 |
| Sichuan  | 450  | 106.63 | 29.72 | planted | 952.7778   | 10183.3333  | 0.3600 |
| An'hui   | 500  | 118.15 | 30.13 | planted | 2259.6491  | 76968.4211  | 0.1425 |
| Hubei    | 120  | 112.80 | 30.80 | planted | 2769.6477  | 41121.9512  | 0.1845 |
| Hubei    | 650  | 111.20 | 31.80 | planted | 2461.9640  | 36325.4956  | 0.2169 |
| Zhejiang | 369  | 120.00 | 28.50 | natural | 2546.1648  | 52070.3125  | 0.2816 |
| Zhejiang | 200  | 120.60 | 28.00 | planted | 5360.6463  | 66658.9729  | 0.1733 |

**Subtropical montane *Pinus armandii*, *P. taiwanensis* and *P. densata* forest**

|          |      |        |       |         |            |             |        |
|----------|------|--------|-------|---------|------------|-------------|--------|
| An'hui   | 1700 | 116.10 | 31.00 | natural | 5127.2727  | 51690.9091  | 0.2200 |
| An'hui   | 1050 | 116.30 | 30.80 | natural | 5635.5932  | 92720.3390  | 0.2360 |
| Fujian   | 845  | 119.30 | 26.00 | natural | 11830.9859 | 299450.7042 | 0.0710 |
| Fujian   | 1200 | 118.90 | 27.00 | natural | 5371.4286  | 118328.5714 | 0.2100 |
| Fujian   | 1200 | 117.10 | 27.20 | natural | 3576.0000  | 52964.0000  | 0.2500 |
| Gansu    | 1625 | 105.88 | 34.55 | natural | 1951.4286  | 18360.0000  | 0.3500 |
| Guizhou  | 1850 | 105.62 | 27.17 | planted | 1170.5475  | 12343.1928  | 0.4767 |
| Guizhou  | 1940 | 104.65 | 27.05 | planted | 972.7947   | 10362.7370  | 0.3639 |
| Guizhou  | 1443 | 104.89 | 27.13 | planted | 8745.4324  | 80621.1937  | 0.0821 |
| Guizhou  | 1400 | 106.82 | 27.05 | planted | 10370.9199 | 114480.7122 | 0.0674 |
| Guizhou  | 1680 | 105.37 | 26.73 | planted | 5776.3158  | 56611.8421  | 0.1520 |
| Guizhou  | 1700 | 105.13 | 25.68 | planted | 5545.2436  | 52720.4176  | 0.1724 |
| Guizhou  | 2200 | 103.84 | 26.70 | natural | 3151.6184  | 71712.0954  | 0.1174 |
| Guizhou  | 2360 | 104.33 | 26.88 | planted | 6629.5884  | 60411.5684  | 0.0899 |
| Guizhou  | 2300 | 104.16 | 27.02 | planted | 4277.3723  | 42948.9051  | 0.1370 |
| Guizhou  | 2225 | 104.20 | 26.80 | natural | 8295.4545  | 190123.9669 | 0.0968 |
| Guizhou  | 1920 | 104.65 | 24.90 | planted | 3718.8020  | 39808.6522  | 0.1202 |
| Henan    | 802  | 115.50 | 31.50 | natural | 4139.2801  | 60352.1127  | 0.2556 |
| Henan    | 718  | 114.80 | 31.60 | natural | 6373.0929  | 89368.9320  | 0.1442 |
| Hubei    | 1638 | 110.30 | 31.00 | planted | 4302.0222  | 34983.6921  | 0.3066 |
| Hubei    | 1190 | 111.70 | 30.80 | natural | 5136.8421  | 85431.5789  | 0.0950 |
| Hubei    | 1800 | 110.60 | 31.70 | natural | 5004.6083  | 71465.4378  | 0.1085 |
| Hubei    | 1700 | 113.60 | 31.40 | planted | 1046.0048  | 10861.9855  | 0.6195 |
| Hubei    | 1140 | 108.90 | 30.30 | natural | 21011.9048 | 392571.4286 | 0.0840 |
| Hubei    | 1350 | 115.70 | 31.00 | planted | 2551.2618  | 34112.7760  | 0.2536 |
| Hubei    | 925  | 113.80 | 29.20 | planted | 4825.3968  | 44463.4921  | 0.1575 |
| Hubei    | 120  | 114.30 | 29.70 | planted | 3549.0196  | 40643.1373  | 0.2550 |
| Hubei    | 1500 | 111.30 | 30.70 | planted | 18272.1893 | 147834.3195 | 0.0845 |
| Hunan    | 1433 | 113.80 | 28.90 | natural | 2497.9547  | 31153.5315  | 0.3667 |
| Shandong | 1000 | 117.20 | 36.40 | planted | 2408.6444  | 22499.0177  | 0.2545 |

|                                                   |      |        |       |         |            |              |        |
|---------------------------------------------------|------|--------|-------|---------|------------|--------------|--------|
| Shanxi                                            | 1435 | 105.60 | 32.67 | natural | 1204.7619  | 19352.3810   | 0.4200 |
| Shanxi                                            | 2040 | 106.60 | 33.50 | natural | 5141.3043  | 122347.8261  | 0.0920 |
| Shanxi                                            | 1787 | 108.35 | 33.35 | natural | 2336.2832  | 32877.8761   | 0.2825 |
| Shanxi                                            | 1700 | 107.50 | 33.20 | natural | 12437.5000 | 216156.2500  | 0.0640 |
| Shanxi                                            | 2120 | 107.20 | 33.90 | natural | 3326.9962  | 81150.1901   | 0.2104 |
| Sichuan                                           | 3445 | 101.20 | 27.90 | natural | 9667.6737  | 105599.1944  | 0.0993 |
| Sichuan                                           | 3100 | 101.00 | 30.00 | natural | 9085.9799  | 102680.0930  | 0.1291 |
| Tibet                                             | 2414 | 95.00  | 30.10 | natural | 24340.2778 | 509270.8333  | 0.0288 |
| Tibet                                             | 2400 | 94.90  | 30.20 | natural | 23387.6221 | 523745.9283  | 0.0307 |
| Tibet                                             | 2864 | 95.70  | 29.80 | natural | 29774.4361 | 1171165.4135 | 0.0266 |
| Tibet                                             | 2866 | 95.70  | 29.80 | natural | 25040.6504 | 680189.7019  | 0.0369 |
| Tibet                                             | 3210 | 94.10  | 29.20 | natural | 21213.0178 | 370177.5148  | 0.0338 |
| Tibet                                             | 3219 | 94.10  | 29.70 | natural | 12637.7491 | 206764.3611  | 0.0853 |
| Tibet                                             | 2651 | 85.20  | 28.90 | natural | 16774.1935 | 303259.7623  | 0.0589 |
| Tibet                                             | 2880 | 91.90  | 27.90 | natural | 6248.8307  | 78699.7194   | 0.1069 |
| Tibet                                             | 3558 | 93.10  | 29.00 | natural | 20949.3671 | 423734.1772  | 0.0316 |
| Tibet                                             | 2900 | 92.30  | 28.40 | natural | 20973.7828 | 363146.0674  | 0.0267 |
| Tibet                                             | 2350 | 96.70  | 28.70 | natural | 28524.5902 | 1177377.0492 | 0.0183 |
| Tibet                                             | 3000 | 96.70  | 28.70 | natural | 10288.6248 | 110976.2309  | 0.1178 |
| Tibet                                             | 2900 | 88.90  | 27.40 | natural | 23536.3458 | 441630.6483  | 0.0509 |
| Yunnan                                            | 3360 | 99.20  | 28.25 | natural | 8066.3507  | 75251.1848   | 0.1055 |
| Yunnan                                            | 3450 | 100.11 | 26.67 | natural | 3444.4014  | 20871.7551   | 0.2581 |
| Yunnan                                            | 3152 | 100.48 | 27.38 | natural | 9877.7293  | 103973.7991  | 0.1145 |
| Yunnan                                            | 3300 | 99.51  | 27.53 | natural | 12095.8084 | 144481.0379  | 0.1002 |
| Yunnan                                            | 3220 | 100.96 | 27.23 | natural | 2832.7292  | 15820.8182   | 0.1931 |
| <b>Subtropical Cunninghamia lanceolata forest</b> |      |        |       |         |            |              |        |
| Hainan                                            | 780  | 108.80 | 18.70 | planted | 3310.0349  | 64822.7659   | 0.2003 |
| Guangxi                                           | 500  | 110.30 | 21.68 | planted | 2287.2727  | 46516.3636   | 0.2750 |
| Guangxi                                           | 460  | 111.10 | 23.10 | planted | 1635.7724  | 17391.8699   | 0.3075 |
| Taiwan                                            | 1526 | 120.90 | 23.70 | planted | 12939.8254 | 129871.3826  | 0.2177 |
| Guangxi                                           | 250  | 109.70 | 23.80 | planted | 7688.4058  | 151065.2174  | 0.1380 |
| Guangxi                                           | 490  | 110.88 | 23.88 | planted | 3524.2930  | 43226.9761   | 0.1379 |
| Taiwan                                            | 1287 | 121.12 | 24.03 | planted | 14053.8462 | 194638.4615  | 0.1300 |
| Guangxi                                           | 405  | 106.23 | 24.27 | planted | 2955.3957  | 22365.4676   | 0.3475 |
| Fujian                                            | 400  | 117.60 | 24.40 | planted | 2454.1667  | 28875.0000   | 0.2400 |
| Taiwan                                            | 1707 | 121.10 | 24.52 | planted | 16280.4878 | 124615.8537  | 0.1640 |
| Guangxi                                           | 205  | 108.75 | 24.58 | planted | 3285.0780  | 39766.1470   | 0.1796 |
| Fujian                                            | 400  | 117.20 | 24.70 | planted | 7650.3067  | 59325.1534   | 0.1630 |
| Taiwan                                            | 460  | 121.57 | 24.83 | planted | 14176.4706 | 119529.4118  | 0.1700 |
| Hunan                                             | 624  | 111.04 | 25.17 | planted | 2651.0989  | 44107.1429   | 0.2184 |
| Hunan                                             | 810  | 111.12 | 25.23 | planted | 2457.8059  | 40959.9156   | 0.1896 |
| Guangxi                                           | 419  | 109.09 | 25.30 | planted | 4187.5000  | 53085.9375   | 0.1280 |
| Guizhou                                           | 1445 | 105.21 | 25.40 | planted | 4767.5569  | 33862.5124   | 0.2022 |
| Guizhou                                           | 461  | 107.17 | 25.48 | planted | 4307.6923  | 129435.8974  | 0.1950 |

|         |      |        |       |         |            |             |        |
|---------|------|--------|-------|---------|------------|-------------|--------|
| Guizhou | 365  | 108.61 | 25.50 | planted | 6156.7568  | 57059.4595  | 0.1850 |
| Guangxi | 966  | 110.10 | 25.53 | planted | 4213.4831  | 53417.6030  | 0.1068 |
| Guangxi | 750  | 109.80 | 25.75 | planted | 5012.6422  | 65752.2124  | 0.1582 |
| Guangxi | 380  | 110.00 | 25.80 | planted | 5392.8571  | 83492.8571  | 0.1400 |
| Guizhou | 430  | 109.40 | 26.12 | planted | 4533.8567  | 30618.2532  | 0.2038 |
| Hunan   | 450  | 109.50 | 26.20 | planted | 5964.9854  | 97532.3051  | 0.2399 |
| Jiangxi | 220  | 114.50 | 26.30 | planted | 7102.7027  | 113670.2703 | 0.1850 |
| Guizhou | 1402 | 106.17 | 26.48 | planted | 5840.9091  | 51164.7727  | 0.1760 |
| Jiangxi | 300  | 114.40 | 26.50 | planted | 5542.6918  | 87091.1722  | 0.2073 |
| Guizhou | 860  | 108.91 | 26.53 | planted | 6576.8194  | 65597.4843  | 0.1113 |
| Fujian  | 450  | 118.10 | 26.60 | planted | 6472.2222  | 113152.7778 | 0.2160 |
| Fujian  | 450  | 118.10 | 26.60 | planted | 5990.6760  | 382307.6923 | 0.1716 |
| Fujian  | 400  | 117.90 | 26.60 | planted | 8523.7484  | 164435.1733 | 0.1558 |
| Guizhou | 1400 | 105.77 | 26.62 | planted | 5046.6805  | 37935.6846  | 0.1928 |
| Fujian  | 400  | 118.20 | 26.80 | planted | 7526.1324  | 138815.3310 | 0.1435 |
| Guizhou | 790  | 108.99 | 26.85 | planted | 5353.0864  | 42780.2469  | 0.2025 |
| Guizhou | 380  | 109.43 | 27.03 | planted | 6805.2516  | 70477.0241  | 0.2285 |
| Guizhou | 400  | 109.35 | 27.10 | planted | 4586.7769  | 31313.1313  | 0.2178 |
| Guizhou | 700  | 110.23 | 27.12 | natural | 2324.2972  | 38765.0602  | 0.1992 |
| Guizhou | 1010 | 107.56 | 27.27 | planted | 5214.7016  | 40560.4076  | 0.2748 |
| Jiangxi | 400  | 114.60 | 27.30 | planted | 4673.8072  | 299795.5209 | 0.1027 |
| Guizhou | 760  | 108.37 | 27.53 | planted | 4188.7338  | 26186.8079  | 0.4154 |
| Guizhou | 715  | 108.60 | 27.82 | planted | 4799.7284  | 34324.5078  | 0.1473 |
| Hunan   | 220  | 111.00 | 28.10 | natural | 934.1101   | 15907.9952  | 0.4978 |
| Guizhou | 560  | 108.92 | 28.13 | planted | 5145.2991  | 39495.7265  | 0.1170 |
| Guizhou | 1427 | 106.56 | 28.13 | planted | 5525.6724  | 45590.8720  | 0.1227 |
| Guizhou | 660  | 108.80 | 28.22 | planted | 5098.2318  | 38673.8703  | 0.1018 |
| Guizhou | 712  | 108.45 | 28.25 | planted | 5079.3651  | 38418.8034  | 0.1638 |
| Guizhou | 1167 | 105.87 | 28.35 | planted | 5666.5181  | 48100.7579  | 0.2243 |
| Jiangxi | 500  | 114.50 | 28.40 | natural | 1972.2849  | 28930.0677  | 0.3103 |
| Guizhou | 1060 | 107.54 | 28.47 | planted | 5353.3191  | 42805.1392  | 0.1401 |
| Guizhou | 1200 | 107.18 | 28.65 | planted | 5101.2536  | 38717.4542  | 0.1037 |
| Jiangxi | 220  | 115.72 | 28.75 | planted | 7366.0714  | 73412.6984  | 0.2016 |
| Guizhou | 1100 | 107.92 | 28.87 | planted | 5446.5849  | 44337.4197  | 0.1713 |
| Hunan   | 450  | 111.13 | 28.90 | planted | 3153.5818  | 36011.1023  | 0.3783 |
| Hubei   | 500  | 113.80 | 29.20 | planted | 11639.5864 | 110302.8065 | 0.1354 |
| Hubei   | 1910 | 109.10 | 29.60 | planted | 3396.0047  | 26180.9636  | 0.1702 |
| An'hui  | 450  | 117.70 | 29.80 | planted | 1633.9286  | 44104.1667  | 0.3360 |
| Sichuan | 1200 | 103.37 | 29.92 | planted | 11670.8229 | 64324.1895  | 0.2005 |
| Hubei   | 600  | 109.40 | 30.20 | planted | 9082.7338  | 82494.0048  | 0.1668 |
| Hubei   | 500  | 115.70 | 31.00 | planted | 6892.1967  | 59733.8746  | 0.2217 |
| An'hui  | 400  | 116.30 | 31.30 | planted | 5211.1111  | 43083.3333  | 0.1800 |
| Jiangsu | 400  | 119.80 | 31.30 | planted | 4083.3333  | 32433.3333  | 0.3000 |
| An'hui  | 400  | 115.80 | 31.60 | planted | 2437.0370  | 17829.6296  | 0.2700 |

|                                                        |      |        |       |         |            |             |        |
|--------------------------------------------------------|------|--------|-------|---------|------------|-------------|--------|
| Jiangsu                                                | 50   | 119.51 | 31.64 | planted | 3213.8114  | 24448.8712  | 0.3765 |
| Henan                                                  | 200  | 114.08 | 32.12 | planted | 4447.2727  | 36480.0000  | 0.2750 |
| Guangxi                                                | 400  | 109.50 | 22.20 | planted | 2076.4120  | 23210.1329  | 0.2408 |
| Guangdong                                              | 200  | 114.70 | 22.90 | planted | 2266.6667  | 36643.1373  | 0.2550 |
| Guangdong                                              | 400  | 111.88 | 23.12 | planted | 2023.8095  | 38420.6349  | 0.2520 |
| Guangxi                                                | 400  | 111.50 | 24.10 | planted | 3575.2688  | 44413.9785  | 0.1860 |
| Guangxi                                                | 720  | 106.33 | 24.28 | planted | 6746.6667  | 87260.0000  | 0.1500 |
| Guangdong                                              | 400  | 114.40 | 24.30 | planted | 2145.9370  | 30311.7745  | 0.3015 |
| Guangxi                                                | 1373 | 106.31 | 24.40 | planted | 3984.3750  | 48246.5278  | 0.2304 |
| Jiangxi                                                | 600  | 114.50 | 24.70 | planted | 6808.3990  | 100204.7244 | 0.1905 |
| Jiangxi                                                | 600  | 114.40 | 24.80 | planted | 6808.3990  | 100204.7244 | 0.1905 |
| Hunan                                                  | 500  | 111.50 | 24.80 | natural | 3118.5410  | 51671.7325  | 0.1645 |
| Hunan                                                  | 439  | 111.70 | 24.90 | planted | 3326.6833  | 57715.7107  | 0.2005 |
| Guangxi                                                | 400  | 109.20 | 25.00 | planted | 5853.6585  | 79750.0000  | 0.1640 |
| Hunan                                                  | 343  | 111.70 | 25.00 | planted | 3706.1273  | 61041.0470  | 0.1681 |
| Guangdong                                              | 500  | 113.30 | 25.10 | planted | 3096.3773  | 79712.9187  | 0.1463 |
| Hunan                                                  | 302  | 111.30 | 25.20 | planted | 2262.0170  | 37728.5580  | 0.2122 |
| Fujian                                                 | 865  | 116.90 | 25.68 | natural | 3281.0458  | 120882.3529 | 0.1530 |
| Fujian                                                 | 400  | 117.50 | 26.10 | planted | 3282.5279  | 47907.0632  | 0.2690 |
| Fujian                                                 | 400  | 118.10 | 26.50 | planted | 6530.1205  | 115908.4337 | 0.2075 |
| Guizhou                                                | 434  | 109.10 | 26.60 | planted | 7938.3117  | 104017.8571 | 0.2464 |
| Hunan                                                  | 450  | 109.60 | 26.70 | planted | 6468.9936  | 105577.7702 | 0.2951 |
| Guizhou                                                | 425  | 109.35 | 26.75 | planted | 5468.5176  | 44645.5131  | 0.2017 |
| Fujian                                                 | 403  | 118.30 | 26.80 | planted | 5317.3949  | 166636.4386 | 0.1213 |
| Hunan                                                  | 417  | 109.50 | 26.80 | planted | 4480.7777  | 216619.5316 | 0.2263 |
| Fujian                                                 | 210  | 117.92 | 26.80 | planted | 3270.9187  | 50295.4944  | 0.3418 |
| Hunan                                                  | 400  | 109.75 | 26.83 | planted | 4876.8737  | 110910.0642 | 0.1868 |
| Fujian                                                 | 400  | 118.60 | 27.10 | planted | 4624.2300  | 73712.5257  | 0.2435 |
| Fujian                                                 | 703  | 117.60 | 27.50 | natural | 5808.0808  | 194507.5758 | 0.1584 |
| Jiangxi                                                | 400  | 114.60 | 27.70 | planted | 2805.3171  | 28490.7228  | 0.3611 |
| An'hui                                                 | 1050 | 116.20 | 31.30 | planted | 5114.0351  | 46144.7368  | 0.2280 |
| Shanxi                                                 | 680  | 109.30 | 32.30 | natural | 6057.4413  | 59399.4778  | 0.1532 |
| Jiangsu                                                | 20   | 121.18 | 32.33 | planted | 9483.4835  | 47333.3333  | 0.1665 |
| Zhejiang                                               | 50   | 120.50 | 30.48 | planted | 2433.7349  | 49429.7189  | 0.2490 |
| Guangdong                                              | 500  | 112.10 | 23.90 | planted | 3200.2706  | 87868.7415  | 0.1478 |
| Guangxi                                                | 355  | 109.99 | 22.55 | planted | 3725.0294  | 46351.3514  | 0.1702 |
| <b>Subtropical montane Cupressus and Sabina forest</b> |      |        |       |         |            |             |        |
| Hunan                                                  | 1235 | 110.25 | 25.50 | natural | 5226.9780  | 181861.2192 | 0.1542 |
| Guizhou                                                | 1336 | 106.20 | 27.40 | natural | 5982.6087  | 78602.8986  | 0.1725 |
| Hunan                                                  | 200  | 113.10 | 27.70 | planted | 5520.5205  | 37832.8328  | 0.1998 |
| Guizhou                                                | 780  | 106.44 | 28.25 | planted | 3829.2104  | 31758.7259  | 0.2951 |
| Guizhou                                                | 1280 | 105.87 | 28.28 | natural | 8227.1062  | 93267.3993  | 0.1365 |
| Guizhou                                                | 1060 | 106.48 | 28.32 | natural | 9383.0846  | 112995.0249 | 0.1005 |
| Sichuan                                                | 3100 | 102.10 | 28.50 | natural | 17327.5862 | 284752.1552 | 0.0928 |

|         |      |        |       |         |            |             |        |
|---------|------|--------|-------|---------|------------|-------------|--------|
| Guizhou | 500  | 108.59 | 28.65 | natural | 5827.5862  | 56870.6897  | 0.1160 |
| Tibet   | 3445 | 85.20  | 28.90 | natural | 8838.7824  | 132322.4352 | 0.0887 |
| Tibet   | 2300 | 95.00  | 30.10 | natural | 12674.2301 | 447763.3712 | 0.0617 |
| Sichuan | 3270 | 102.40 | 30.90 | natural | 22234.0426 | 491303.1915 | 0.0376 |
| Sichuan | 3300 | 98.80  | 31.20 | natural | 7224.3590  | 82858.9744  | 0.1560 |
| Sichuan | 484  | 105.15 | 31.65 | planted | 6631.0497  | 38975.4871  | 0.3182 |
| Sichuan | 484  | 105.18 | 31.68 | planted | 9022.2222  | 60874.0741  | 0.1350 |
| Sichuan | 3500 | 103.39 | 33.45 | natural | 12227.9412 | 170352.9412 | 0.1360 |
| Sichuan | 3293 | 103.57 | 33.59 | natural | 10077.6197 | 142147.4774 | 0.0773 |

Note: Where the Alt. is altitude, Long. is longitude, Lat. Is latitude, L is leaf mass, M is body mass, and D is density.
