# Supplementary material for: Trade-Offs between the Metabolic Rate and Population Density of Plants
Source: PubMed Central journal article supplement (PMC2265546; doi:10.1371/journal.pone.0001799), 2008-03-19
Supplement: pone.0001799.s002.pdf [file pone.0001799.s002.pdf]

| <b>Dataset S2. Desert shrubs data</b> |           |                         |                                       |           |                         |           |
|---------------------------------------|-----------|-------------------------|---------------------------------------|-----------|-------------------------|-----------|
| For the analysis of metabolic rate    |           |                         | For the analysis of allometric growth |           |                         |           |
| M(g/no.)                              | L (g/no.) | D (no./m <sup>2</sup> ) | D (no./m <sup>2</sup> )               | M(g/no.)  | D (no./m <sup>2</sup> ) | M(g/no.)  |
| 964.2857                              | 100.0000  | 0.0750                  | 0.0750                                | 950.0000  | 0.8889                  | 962.4087  |
| 160.8696                              | 12.1739   | 0.2700                  | 0.2700                                | 242.0378  | 18.0000                 | 57.7336   |
| 185.3333                              | 33.3333   | 3.3600                  | 3.3600                                | 59.9586   | 17.0000                 | 26.8115   |
| 9120.0000                             | 706.6667  | 3.0000                  | 3.0000                                | 63.7111   | 10.0000                 | 4.0000    |
| 600.0000                              | 64.2857   | 4.0000                  | 4.0000                                | 84.4173   | 27.0000                 | 23.3037   |
| 6122.8571                             | 225.7143  | 0.1667                  | 0.1667                                | 4274.1780 | 5.7500                  | 38.6667   |
| 423.0769                              | 70.0000   | 2.2500                  | 2.2500                                | 152.3465  | 0.9089                  | 932.4087  |
| 1318.6567                             | 80.7463   | 0.1750                  | 0.1750                                | 1314.2857 | 33.5239                 | 3.6908    |
| 1100.0000                             | 80.0000   | 1.3333                  | 1.3333                                | 1012.5000 | 1.3000                  | 176.5188  |
| 918.3721                              | 76.7442   | 0.3600                  | 0.3600                                | 466.7028  | 0.0500                  | 1998.8026 |
| 107.6471                              | 8.2353    | 4.2000                  | 4.2000                                | 44.6698   | 0.7375                  | 1464.2635 |
| 702.6667                              | 8.3333    | 0.3333                  | 0.3333                                | 750.0000  | 0.2245                  | 1758.4035 |
| 211.5385                              | 48.1538   | 2.1111                  | 2.1111                                | 159.0148  | 0.1750                  | 964.2857  |
| 483.0000                              | 57.4800   | 0.6000                  | 0.6000                                | 568.7297  | 0.5750                  | 160.8696  |
| 1314.2857                             | 118.5714  | 0.5889                  | 0.5889                                | 1462.4087 | 1.5000                  | 185.3333  |
| 246.0177                              | 22.6549   | 3.0000                  | 3.0000                                | 59.7147   | 0.0750                  | 9120.0000 |
| 4200.0000                             | 236.6667  | 0.2500                  | 0.2500                                | 4898.2000 | 1.5750                  | 600.0000  |
| 1200.0000                             | 50.0000   | 4.3200                  | 4.3200                                | 152.5788  | 41.7864                 | 5.7872    |
| 302.3529                              | 6.0784    | 7.5000                  | 7.5000                                | 37.7507   | 0.3250                  | 423.0769  |
| 700.0000                              | 73.9130   | 0.8000                  | 0.8000                                | 371.1005  | 1.6750                  | 1318.6567 |
| 96.6667                               | 10.2000   | 2.0000                  | 2.0000                                | 134.5372  | 0.2500                  | 1100.0000 |
| 5560.0000                             | 880.0000  | 0.2500                  | 0.2500                                | 3303.5520 | 76.0000                 | 0.5150    |
| 1400.0000                             | 122.5000  | 12.5000                 | 12.5000                               | 84.5853   | 0.4250                  | 107.6471  |
| 575.3398                              | 48.5437   | 16.2500                 | 16.2500                               | 10.1627   | 0.7500                  | 702.6667  |
| 1576.9231                             | 146.1538  | 0.8333                  | 0.8333                                | 990.0000  | 0.3250                  | 211.5385  |
| 460.3333                              | 66.3333   | 15.2500                 | 15.2500                               | 37.7089   | 1.2500                  | 483.0000  |
| 300.0000                              | 26.6667   | 11.1111                 | 11.1111                               | 26.4765   | 0.3600                  | 265.1438  |
| 162.6667                              | 18.0000   | 33.3333                 | 33.3333                               | 6.2402    | 2.8250                  | 246.0177  |
| 1257.1429                             | 128.7143  | 0.1667                  | 0.1667                                | 1242.0000 | 27.6964                 | 26.3217   |
| 380.2500                              | 40.6667   | 5.2500                  | 5.2500                                | 28.5000   | 0.0750                  | 1200.0000 |
| 2666.6667                             | 264.6667  | 0.7500                  | 0.7500                                | 2686.6667 | 3.8250                  | 302.3529  |
| 32.0809                               | 5.7803    | 1.0000                  | 1.0000                                | 120.3277  | 0.5750                  | 700.0000  |
| 950.0000                              | 106.6667  | 5.5556                  | 5.5556                                | 47.3387   | 3.7500                  | 96.6667   |
| 465.2023                              | 41.1561   | 1.7778                  | 1.7778                                | 300.0000  | 34.3100                 | 9.1721    |
| 57.9000                               | 3.9000    | 4.5000                  | 4.5000                                | 94.1842   | 0.5000                  | 1400.0000 |
| 141.0000                              | 9.6000    | 6.2500                  | 6.2500                                | 61.0225   | 2.5750                  | 575.3398  |
| 31.5000                               | 2.4000    | 23.5556                 | 23.5556                               | 13.8071   | 0.3250                  | 1576.9231 |
| 191.6140                              | 44.6000   | 1.7500                  | 1.7500                                | 148.5732  | 0.7500                  | 460.3333  |
| 637.0620                              | 93.6150   | 1.6000                  | 1.6000                                | 500.3105  | 0.7500                  | 300.0000  |
| 37.7235                               | 4.2300    | 2.2500                  | 2.2500                                | 117.5248  | 3.0000                  | 162.6667  |
| 165.0792                              | 13.8840   | 95.0000                 | 95.0000                               | 0.4211    | 45.0342                 | 9.1721    |

|           |           |           |           |           |          |           |
|-----------|-----------|-----------|-----------|-----------|----------|-----------|
| 51.7500   | 4.3500    | 11.0000   | 11.0000   | 20.1729   | 3.0000   | 380.2500  |
| 76.5300   | 6.5300    | 5.0000    | 5.0000    | 72.2757   | 2.7500   | 57.0000   |
| 41.0000   | 4.5000    | 220.0000  | 220.0000  | 2.6000    | 4.3250   | 32.0809   |
| 14.0400   | 2.8860    | 1.5556    | 1.5556    | 121.0000  | 2.1600   | 245.6458  |
| 120.0000  | 19.0000   | 1418.7500 | 1418.7500 | 0.8319    | 4.3250   | 465.2023  |
| 214.5000  | 30.2025   | 5.2500    | 5.2500    | 32.2500   | 0.4167   | 57.9000   |
| 926.5665  | 114.8100  | 1.0750    | 1.0750    | 918.3721  | 0.0893   | 181.0000  |
| 210.0158  | 16.4620   | 102.0000  | 102.0000  | 0.3854    | 0.2500   | 191.6140  |
| 30.7500   | 1.3500    | 2.8889    | 2.8889    | 50.4000   | 43.8958  | 3.4279    |
| 60.3878   | 2.7150    | 2.1111    | 2.1111    | 68.3333   | 0.5000   | 37.7235   |
| 43.2000   | 3.0000    | 64.0000   | 64.0000   | 11.5625   | 0.4167   | 165.0792  |
| 121.6050  | 11.6300   | 675.0000  | 675.0000  | 0.1019    | 0.3333   | 91.7500   |
| 2208.0000 | 291.6000  | 0.0833    | 0.0833    | 2418.0000 | 0.2500   | 76.5300   |
| 1242.0000 | 180.0000  | 0.1750    | 0.1750    | 1257.1429 | 0.5000   | 41.0000   |
| 354.5455  | 23.4545   | 213.9908  | 213.9908  | 1.3302    | 0.5000   | 120.0000  |
| 827.6633  | 66.9675   | 0.6667    | 0.6667    | 1185.4639 | 0.3933   | 214.5000  |
| 1012.5000 | 74.2500   | 0.1667    | 0.1667    | 926.5665  | 72.5095  | 1.2999    |
| 1526.6103 | 123.4560  | 0.4167    | 0.4167    | 1576.6272 | 1.2500   | 210.0158  |
| 600.0000  | 73.6364   | 13.8811   | 13.8811   | 10.7500   | 1.2500   | 43.2000   |
| 1079.0931 | 190.6410  | 13.3482   | 13.3482   | 44.9727   | 0.5000   | 121.6050  |
| 1128.8485 | 201.2300  | 19.7435   | 19.7435   | 21.3544   | 16.0000  | 5.0625    |
| 1125.0000 | 111.0000  | 16.1619   | 16.1619   | 27.4708   | 51.0000  | 2.9890    |
| 4898.2000 | 619.4300  | 0.0750    | 0.0750    | 5560.0000 | 0.9167   | 354.5455  |
| 67.5000   | 5.5000    | 201.3500  | 201.3500  | 0.7735    | 0.6667   | 827.6633  |
| 195.0000  | 17.3775   | 27.6964   | 27.6964   | 20.7029   | 2.1111   | 120.5387  |
| 750.0000  | 111.0000  | 15.9787   | 15.9787   | 9.6744    | 127.0433 | 0.6111    |
| 417.8800  | 57.4767   | 96.9224   | 96.9224   | 3.1852    | 0.9167   | 600.0000  |
| 985.7143  | 85.7143   | 63.7151   | 63.7151   | 5.6275    | 0.8333   | 1079.0931 |
| 1080.6210 | 76.6913   | 0.1667    | 0.1667    | 637.0620  | 0.5000   | 1128.8485 |
| 990.0000  | 150.0000  | 73.1547   | 73.1547   | 6.1704    | 0.6667   | 1125.0000 |
| 3303.5520 | 601.4500  | 0.0750    | 0.0750    | 4200.0000 | 5.2222   | 41.0968   |
| 1185.4639 | 188.3025  | 51.3865   | 51.3865   | 4.8718    | 0.5000   | 67.5000   |
| 7948.8150 | 1482.8400 | 0.1750    | 0.1750    | 6122.8571 | 0.3333   | 195.0000  |
| 145.2548  | 4.4025    | 10.8498   | 10.8498   | 12.4809   | 2.2222   | 89.1747   |
| 4274.1780 | 744.4800  | 0.3889    | 0.3889    | 2862.4087 | 0.7500   | 417.8800  |
| 145.4545  | 12.2727   | 17.9284   | 17.9284   | 6.4934    | 0.5833   | 985.7143  |
| 220.0000  | 19.0000   | 319.1182  | 319.1182  | 0.4063    | 0.6667   | 1080.6210 |
| 163.3147  | 25.7486   | 1464.2722 | 1464.2722 | 0.1179    | 21.2500  | 12.0348   |
| 6.6200    | 1.6000    | 2320.7150 | 2320.7150 | 0.0477    | 2.0400   | 238.0206  |
| 28.7900   | 0.2600    | 1843.4094 | 1843.4094 | 0.1478    | 218.5327 | 0.5115    |
| 9.2000    | 0.3600    | 1605.5425 | 1605.5425 | 0.0656    | 0.0833   | 7948.8150 |
| 17.0000   | 0.8200    | 22.0000   | 22.0000   | 10.7500   | 0.8333   | 145.2548  |
| 20.0000   | 0.6400    | 576.1853  | 576.1853  | 0.0828    | 5.2500   | 52.4114   |
| 2.8600    | 0.3900    | 4531.2500 | 4531.2500 | 0.0475    | 0.5500   | 145.4545  |

|          |         |           |           |          |         |          |
|----------|---------|-----------|-----------|----------|---------|----------|
| 22.0000  | 1.0800  | 9.0000    | 9.0000    | 23.4146  | 0.2500  | 220.0000 |
| 46.8500  | 2.3000  | 5.8822    | 5.8822    | 44.6156  | 12.5000 | 163.3147 |
| 5.0000   | 0.2200  | 6.2434    | 6.2434    | 32.4112  | 0.5500  | 145.4545 |
| 12.6600  | 0.6300  | 587.1030  | 587.1030  | 0.1534   | 0.2500  | 220.0000 |
| 8.6000   | 0.3000  | 469.2745  | 469.2745  | 0.1894   | 12.5000 | 163.3147 |
| 28.0000  | 0.9810  | 676.3000  | 676.3000  | 0.1984   |         |          |
| 4.0000   | 0.1200  | 1654.6810 | 1654.6810 | 0.0361   |         |          |
| 24.5000  | 6.2000  | 936.3258  | 936.3258  | 0.0971   |         |          |
| 20.0000  | 6.3100  | 851.4113  | 851.4113  | 0.2277   |         |          |
| 1.2000   | 0.0800  | 12.1600   | 12.1600   | 48.8821  |         |          |
| 46.4600  | 6.5000  | 34.3100   | 34.3100   | 17.4040  |         |          |
| 11.0000  | 1.0900  | 201.3500  | 201.3500  | 1.2319   |         |          |
| 15.0300  | 2.0000  | 2859.0255 | 2859.0255 | 0.0632   |         |          |
| 12.0000  | 0.2300  | 17.4690   | 17.4690   | 55.1250  |         |          |
| 10.9100  | 0.2100  | 9.6437    | 9.6437    | 82.0052  |         |          |
| 7.0000   | 0.4000  | 47.3614   | 47.3614   | 62.8032  |         |          |
| 16.5200  | 0.9500  | 743.7500  | 743.7500  | 0.4499   |         |          |
| 2.4100   | 0.2700  | 14.1167   | 14.1167   | 9.7800   |         |          |
| 42.8300  | 4.9000  | 26.0000   | 26.0000   | 9.7800   |         |          |
| 4.1000   | 0.2000  | 676.3000  | 676.3000  | 2.7780   |         |          |
| 32.8800  | 1.6800  | 44.1282   | 44.1282   | 0.9289   |         |          |
| 25.8000  | 0.1020  | 6.2079    | 6.2079    | 34.7999  |         |          |
| 3.2000   | 0.0180  | 1199.9179 | 1199.9179 | 0.0302   |         |          |
| 35.0000  | 4.5000  | 37.0085   | 37.0085   | 3.5324   |         |          |
| 36.0000  | 4.6000  | 48.1963   | 48.1963   | 2.7421   |         |          |
| 55.1400  | 22.9900 | 456.2500  | 456.2500  | 0.0438   |         |          |
| 65.4700  | 40.1500 | 517.9285  | 517.9285  | 0.0748   |         |          |
| 50.0500  | 26.7300 | 17.4380   | 17.4380   | 2.7022   |         |          |
| 27.9900  | 14.7600 | 34.2351   | 34.2351   | 9.6830   |         |          |
| 24.1100  | 15.5300 | 34.2351   | 34.2351   | 1.0256   |         |          |
| 25.1600  | 17.2300 | 17.4380   | 17.4380   | 1.6490   |         |          |
| 50.2300  | 29.3700 | 22.1165   | 22.1165   | 5.7730   |         |          |
| 80.3900  | 22.4400 | 7.8152    | 7.8152    | 20.9690  |         |          |
| 91.3800  | 33.7700 | 1035.5048 | 1035.5048 | 0.1541   |         |          |
| 58.8600  | 11.0800 | 1956.6593 | 1956.6593 | 0.0300   |         |          |
| 62.8700  | 29.7000 | 778.9601  | 778.9601  | 0.0963   |         |          |
| 86.7500  | 39.5900 | 757.0970  | 757.0970  | 0.0274   |         |          |
| 42.5800  | 19.2300 | 67.6300   | 67.6300   | 2.7421   |         |          |
| 36.7100  | 13.3600 | 0.4808    | 0.4808    | 365.9299 |         |          |
| 56.1700  | 17.6600 | 0.3999    | 0.3999    | 271.6307 |         |          |
| 326.6700 | 93.4100 | 583.3380  | 583.3380  | 0.0210   |         |          |
| 46.8690  | 19.5415 | 1284.4413 | 1284.4413 | 0.0094   |         |          |
| 55.6495  | 34.1275 | 6.3437    | 6.3437    | 4.4989   |         |          |
| 42.5425  | 22.7205 | 10.5539   | 10.5539   | 4.8207   |         |          |

|          |          |          |          |           |
|----------|----------|----------|----------|-----------|
| 23.7915  | 12.5460  | 17.1455  | 17.1455  | 1.6245    |
| 20.4935  | 13.2005  | 17.5677  | 17.5677  | 12.5029   |
| 21.3860  | 14.6455  | 28.0000  | 28.0000  | 0.9750    |
| 42.6955  | 24.9645  | 15.4630  | 15.4630  | 7.9722    |
| 94.8602  | 26.4792  | 8.5000   | 8.5000   | 36.1209   |
| 107.8284 | 39.8486  | 618.7500 | 618.7500 | 0.0547    |
| 69.4548  | 13.0744  | 579.4473 | 579.4473 | 0.2112    |
| 74.1866  | 35.0460  | 676.3000 | 676.3000 | 0.5780    |
| 102.3650 | 46.7162  | 0.4900   | 0.4900   | 172.4010  |
| 50.2444  | 22.6914  | 924.5285 | 924.5285 | 0.0339    |
| 43.3178  | 15.7648  | 997.0439 | 997.0439 | 0.0125    |
| 66.2806  | 20.8388  | 26.0000  | 26.0000  | 1.6245    |
| 385.4706 | 110.2238 | 1.5000   | 1.5000   | 176.5188  |
| 187.8284 | 69.8486  | 0.0600   | 0.0600   | 2298.8026 |
| 202.3650 | 46.7162  | 0.4375   | 0.4375   | 1634.2635 |
| 285.4706 | 75.2238  | 0.1224   | 0.1224   | 2398.4035 |
| 137.8284 | 19.8486  | 0.1800   | 0.1800   | 459.6718  |
| 122.3650 | 36.7162  | 0.1400   | 0.1400   | 1440.0640 |
| 165.4706 | 65.2238  | 12.7500  | 12.7500  | 62.2318   |

Note: Where L is leaf mass, M is body mass, and D is density. For the description on sites, see Materials and Methods of the main text.
