# Supplementary material for: Trade-Offs between the Metabolic Rate and Population Density of Plants
Source: PubMed Central journal article supplement (PMC2265546; doi:10.1371/journal.pone.0001799), 2008-03-19
Supplement: pone.0001799.s003.pdf [file pone.0001799.s003.pdf]

| <b>Dataset S3. Spring wheat data</b> |          |            |                         |            |                         |
|--------------------------------------|----------|------------|-------------------------|------------|-------------------------|
| Time                                 | M(g/no.) | L (g/no.)  | D (no./m <sup>2</sup> ) | M(g/no.)   | D (no./m <sup>2</sup> ) |
| 2004                                 | 0.4955   | 0.2237     | 2001                    | 0.4955     | 2001                    |
|                                      | 0.7933   | 0.1701     | 1963                    | 0.7933     | 1963                    |
|                                      | 1.2003   | 0.1112     | 1902                    | 1.2003     | 1902                    |
|                                      | 0.1076   | 0.0324     | 5985                    | 0.1076     | 5985                    |
|                                      | 0.1181   | 0.0817     | 5970                    | 0.1181     | 5970                    |
|                                      | 0.1535   | 0.1082     | 5862                    | 0.1535     | 5862                    |
|                                      | 0.3507   | 0.0700     | 3217                    | 0.3507     | 3217                    |
|                                      | 0.6581   | 0.0422     | 2363                    | 0.6581     | 2363                    |
|                                      | 0.0328   | 0.0342     | 10231                   | 0.0328     | 10231                   |
|                                      | 0.0463   | 0.0335     | 9925                    | 0.0463     | 9925                    |
|                                      | 0.0849   | 0.0616     | 9196                    | 0.0849     | 9196                    |
|                                      | 0.1489   | 0.0335     | 4513                    | 0.1489     | 4513                    |
|                                      | 0.1764   | 0.0242     | 3842                    | 0.1764     | 3842                    |
|                                      | 0.0228   | 0.0159     | 16673                   | 0.0228     | 16673                   |
|                                      | 0.0346   | 0.0327     | 14673                   | 0.0346     | 14673                   |
|                                      | 0.0749   | 0.0634     | 10031                   | 0.0749     | 10031                   |
|                                      | 0.1149   | 0.0335     | 7862                    | 0.1149     | 7862                    |
|                                      | 0.1336   | 0.0260     | 6677                    | 0.1336     | 6677                    |
|                                      | 0.0123   | 0.0083     | 29469                   | 0.0123     | 29469                   |
|                                      | 0.0246   | 0.0252     | 24469                   | 0.0246     | 24469                   |
| 0.0463                               | 0.0452   | 16623      | 0.0463                  | 16623      |                         |
| 0.0894                               | 0.0260   | 10424.0710 | 0.0894                  | 10424.0710 |                         |
| 0.1006                               | 0.0218   | 6314.2100  | 0.1006                  | 6314.2100  |                         |
| 2003                                 | 0.0820   | 0.0332     | 2812                    | 0.0820     | 2812                    |
|                                      | 0.1670   | 0.0514     | 2388                    | 0.1670     | 2388                    |
|                                      | 0.4950   | 0.1113     | 2480                    | 0.4950     | 2480                    |
|                                      | 0.6850   | 0.0558     | 2288                    | 0.6850     | 2288                    |
|                                      | 0.7810   | 0.0622     | 1992                    | 0.7810     | 1992                    |
|                                      | 0.0410   | 0.0210     | 10112                   | 0.0410     | 10112                   |
|                                      | 0.0640   | 0.0253     | 9220                    | 0.0640     | 9220                    |
|                                      | 0.1300   | 0.0559     | 7464                    | 0.1300     | 7464                    |
|                                      | 0.2510   | 0.0400     | 5424                    | 0.2510     | 5424                    |
|                                      | 0.3710   | 0.0512     | 2868                    | 0.3710     | 2868                    |
| 2002                                 | 0.2132   | 0.0723     | 1200                    | 0.2132     | 1200                    |
|                                      | 0.2759   | 0.1300     | 1315                    | 0.2759     | 1315                    |
|                                      | 0.4633   | 0.1805     | 1315                    | 0.4633     | 1315                    |
|                                      | 0.6570   | 0.1901     | 1315                    | 0.6570     | 1315                    |
|                                      | 1.1688   | 0.1696     | 1315                    | 1.1688     | 1315                    |
|                                      | 0.0567   | 0.0339     | 4720                    | 0.0567     | 4720                    |
|                                      | 0.0710   | 0.0426     | 4740                    | 0.0710     | 4740                    |
|                                      | 0.1425   | 0.0663     | 4255                    | 0.1425     | 4255                    |

|        |        |           |        |           |
|--------|--------|-----------|--------|-----------|
| 0.2406 | 0.0696 | 2915      | 0.2406 | 2915      |
| 0.6073 | 0.0716 | 2225      | 0.6073 | 2225      |
| 0.0316 | 0.0364 | 10640     | 0.0316 | 10640     |
| 0.0390 | 0.0246 | 10267     | 0.0390 | 10267     |
| 0.0757 | 0.0389 | 9546.6670 | 0.0757 | 9546.6670 |
| 0.1319 | 0.0665 | 6226.6670 | 0.1319 | 6226.6670 |
| 0.1559 | 0.0466 | 2945      | 0.1559 | 2945      |

Note: Where L is leaf mass, M is body mass, and D is density.
